# Supplementary material
Source: publisher site journal article supplement (https://www.dovepress.com/article/356621)
Supplement: Supplementary file 1 [file get_supplementary_file.php]

# **Design, Synthesis and Biological Evaluation of 1,4-Benzenesulfonamide Derivatives as Glyoxalase I Inhibitors**

$^1\text{H}$  NMR and  $^{13}\text{C}$  NMR for the Synthesized Compounds

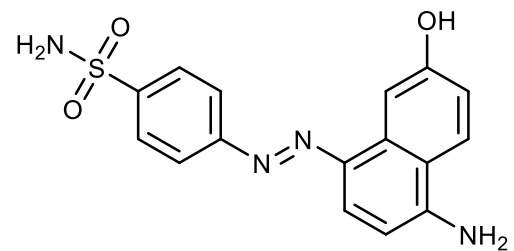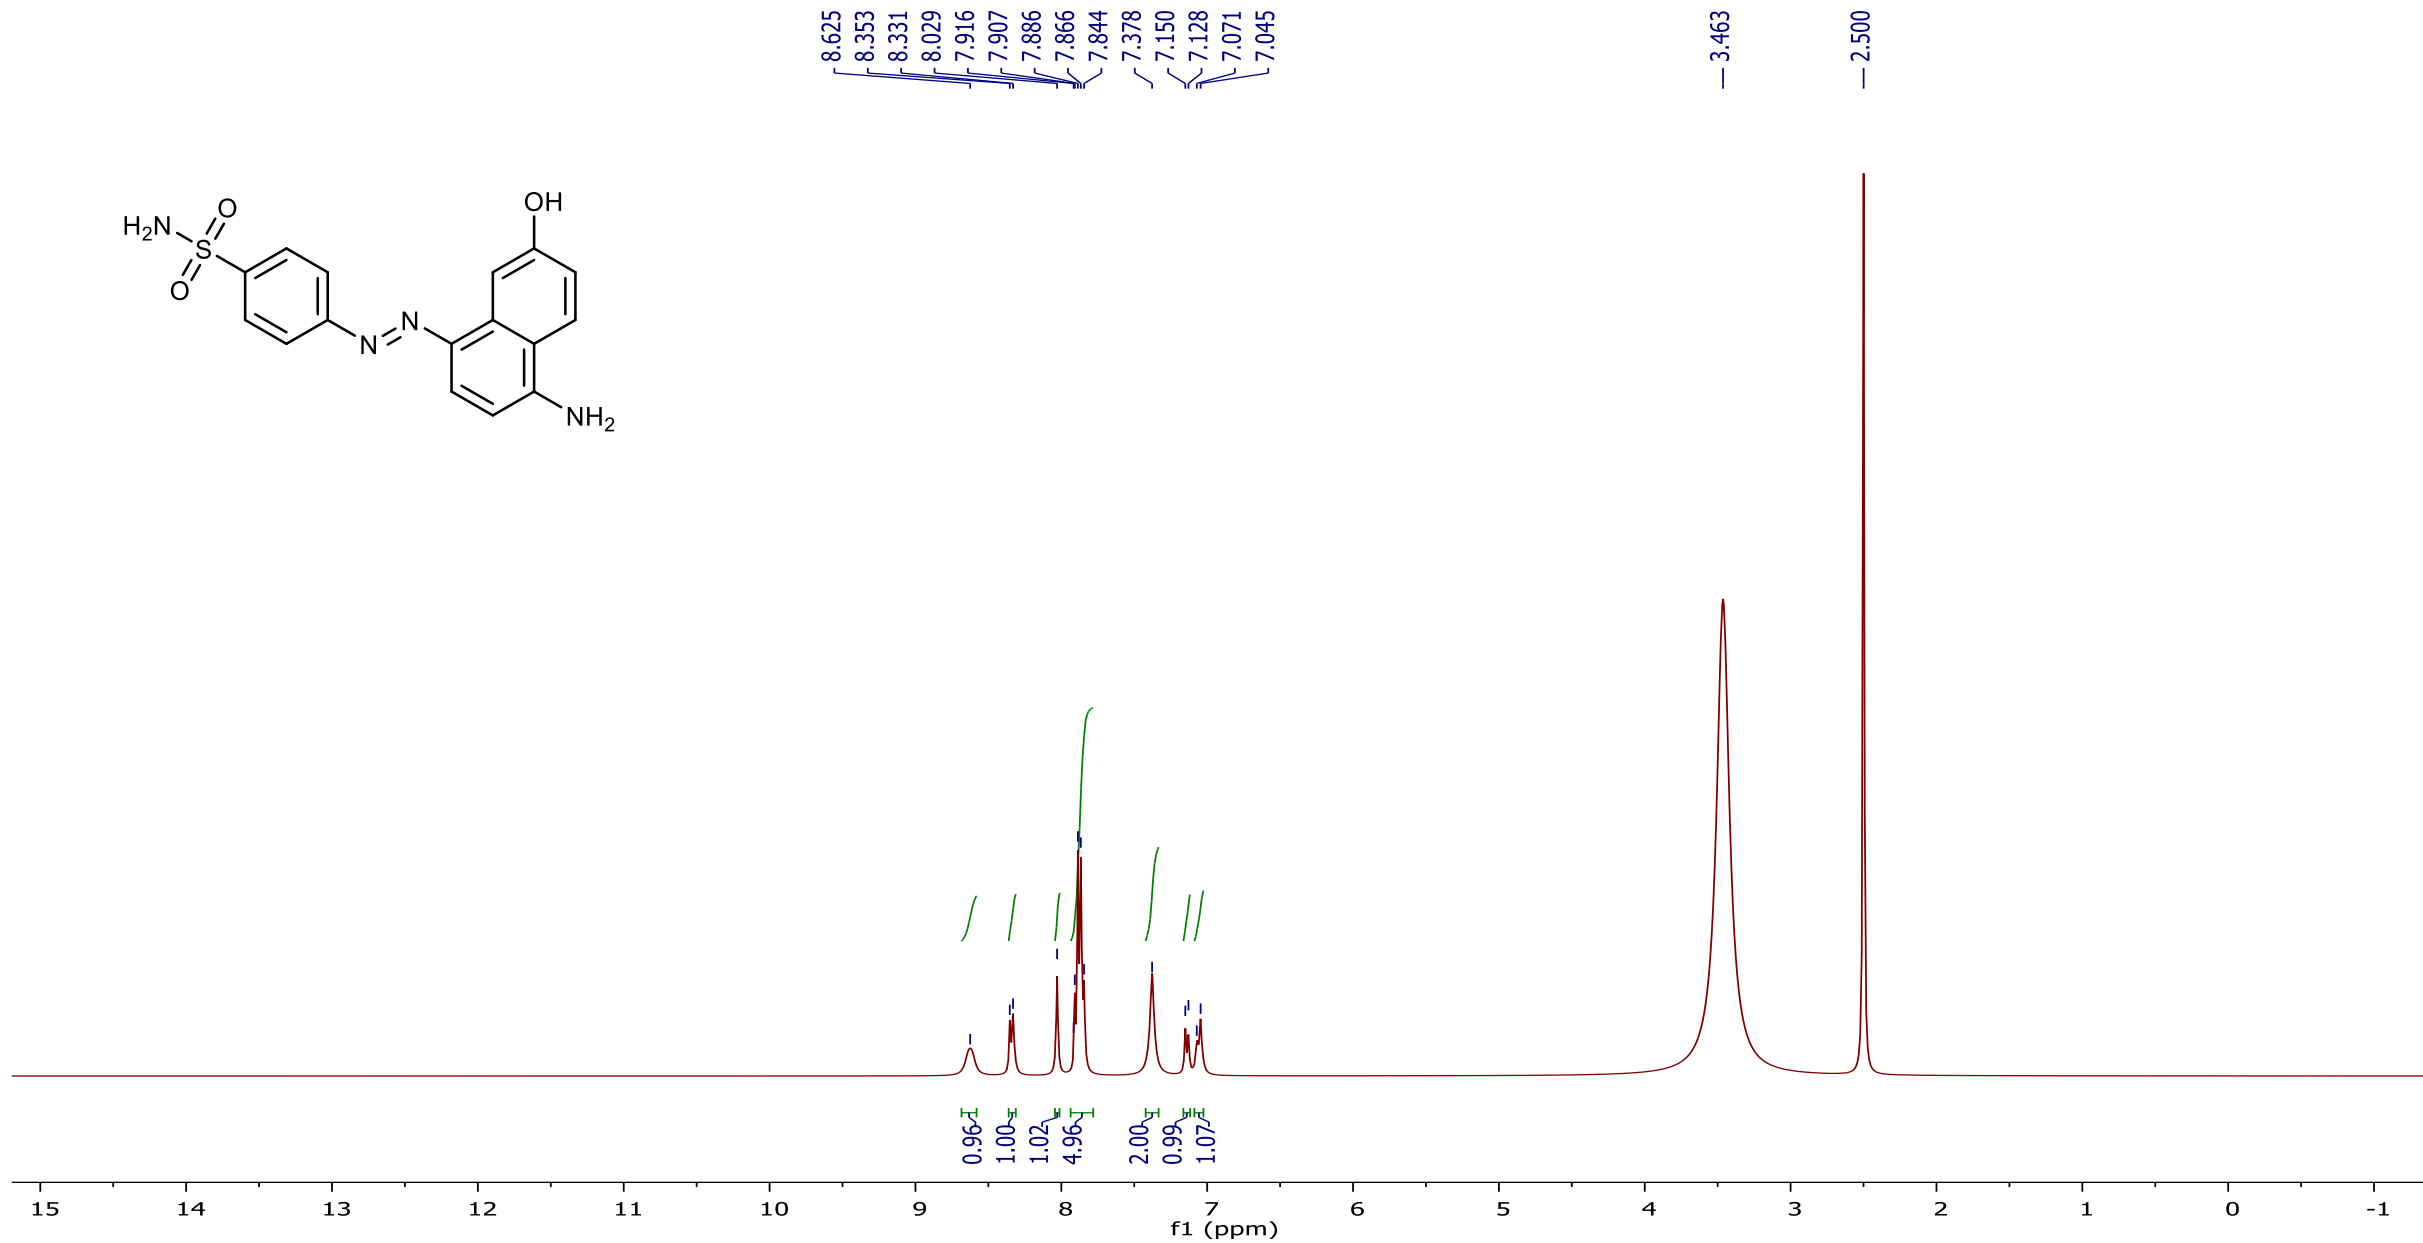

S1: <sup>1</sup>H NMR of Compound 13

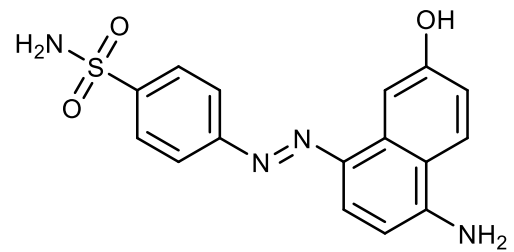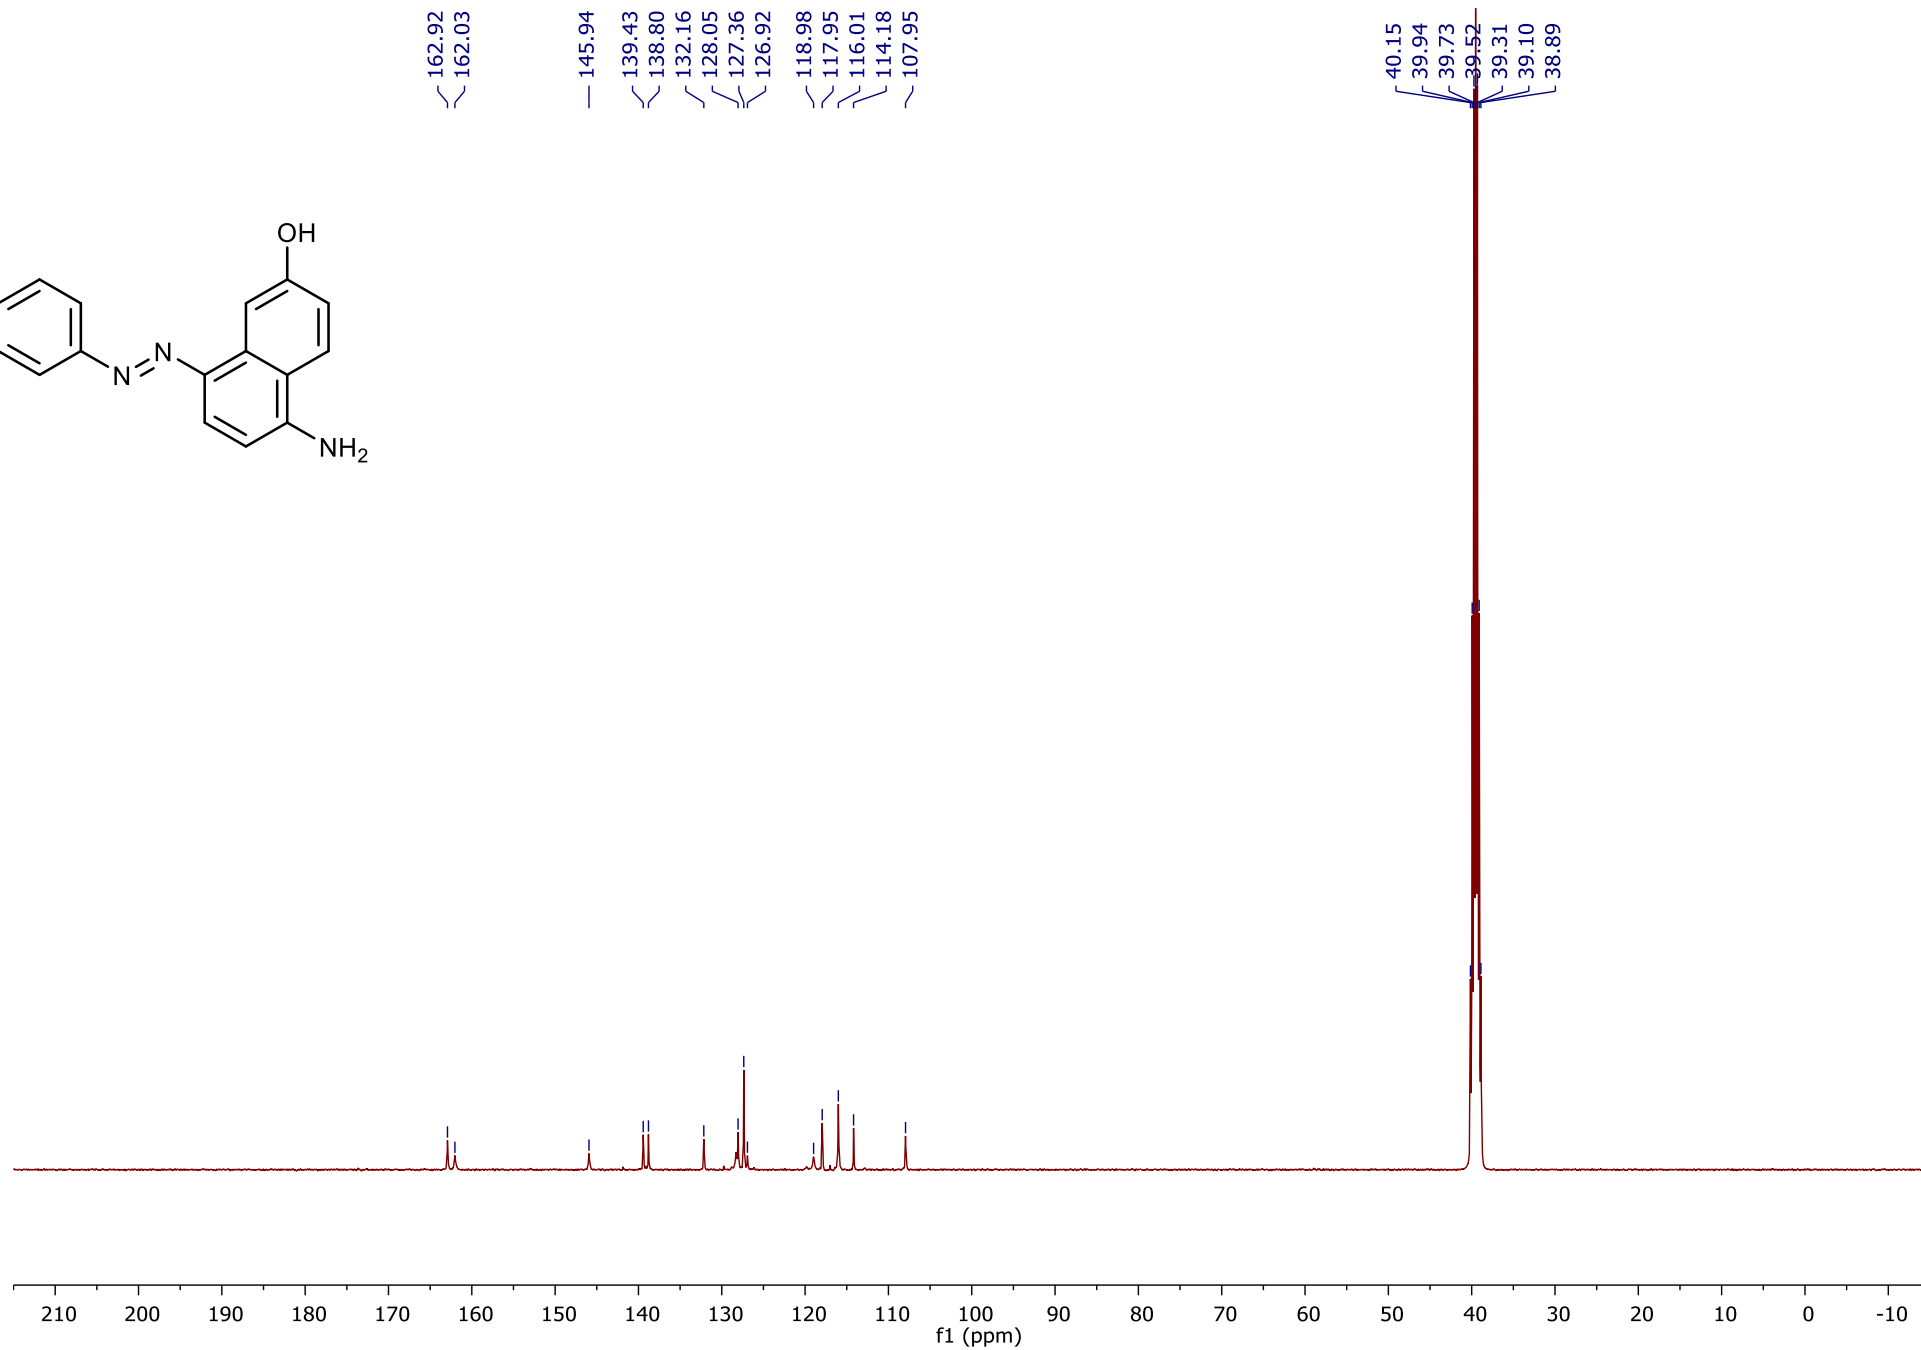

S2. <sup>13</sup>C NMR of Compound 13

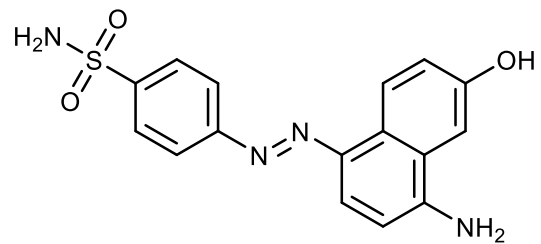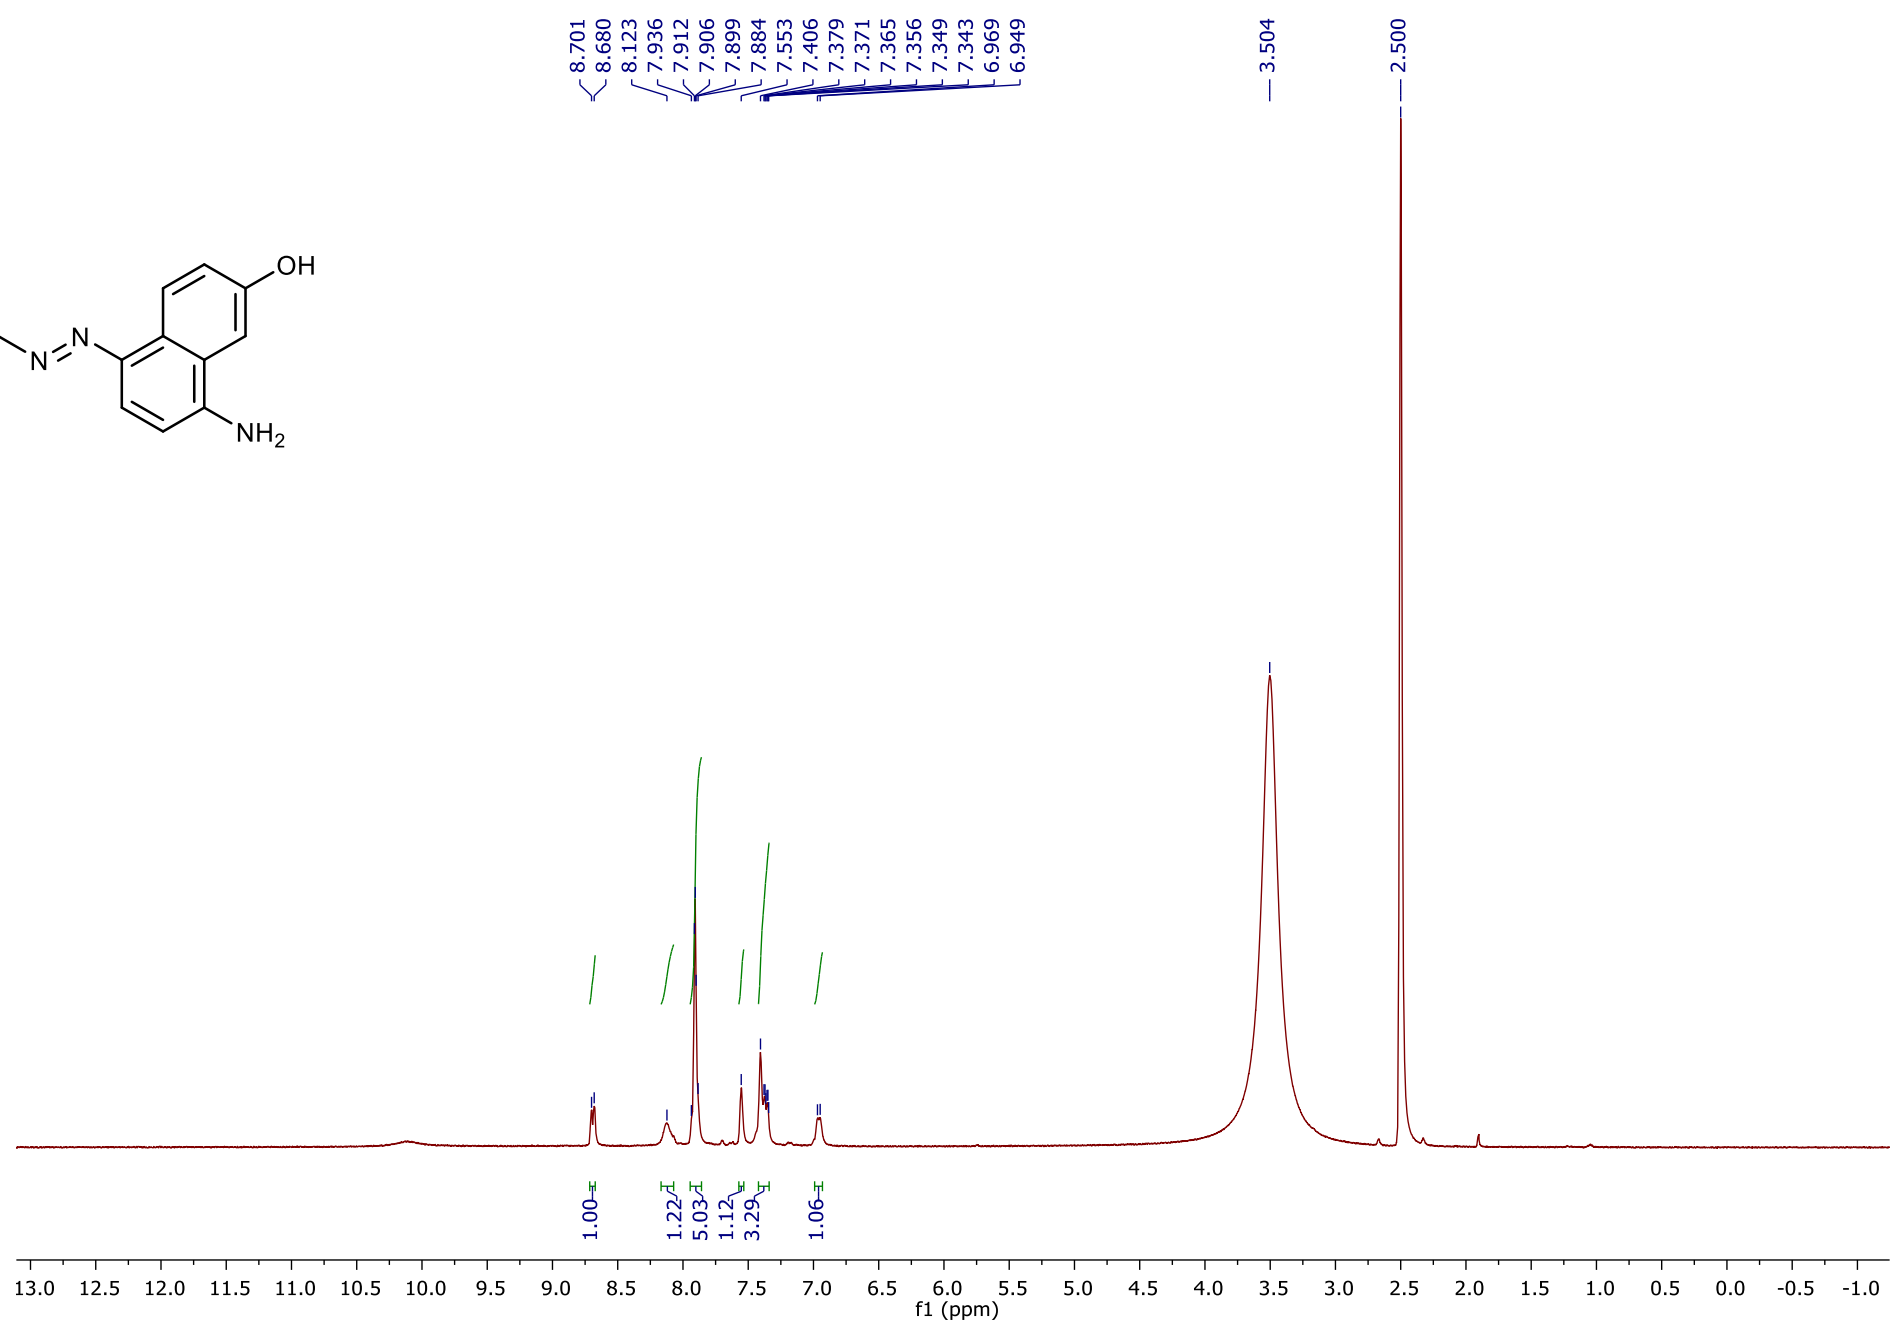

S3: <sup>1</sup>H NMR of Compound 14

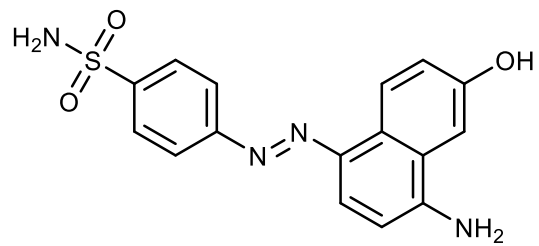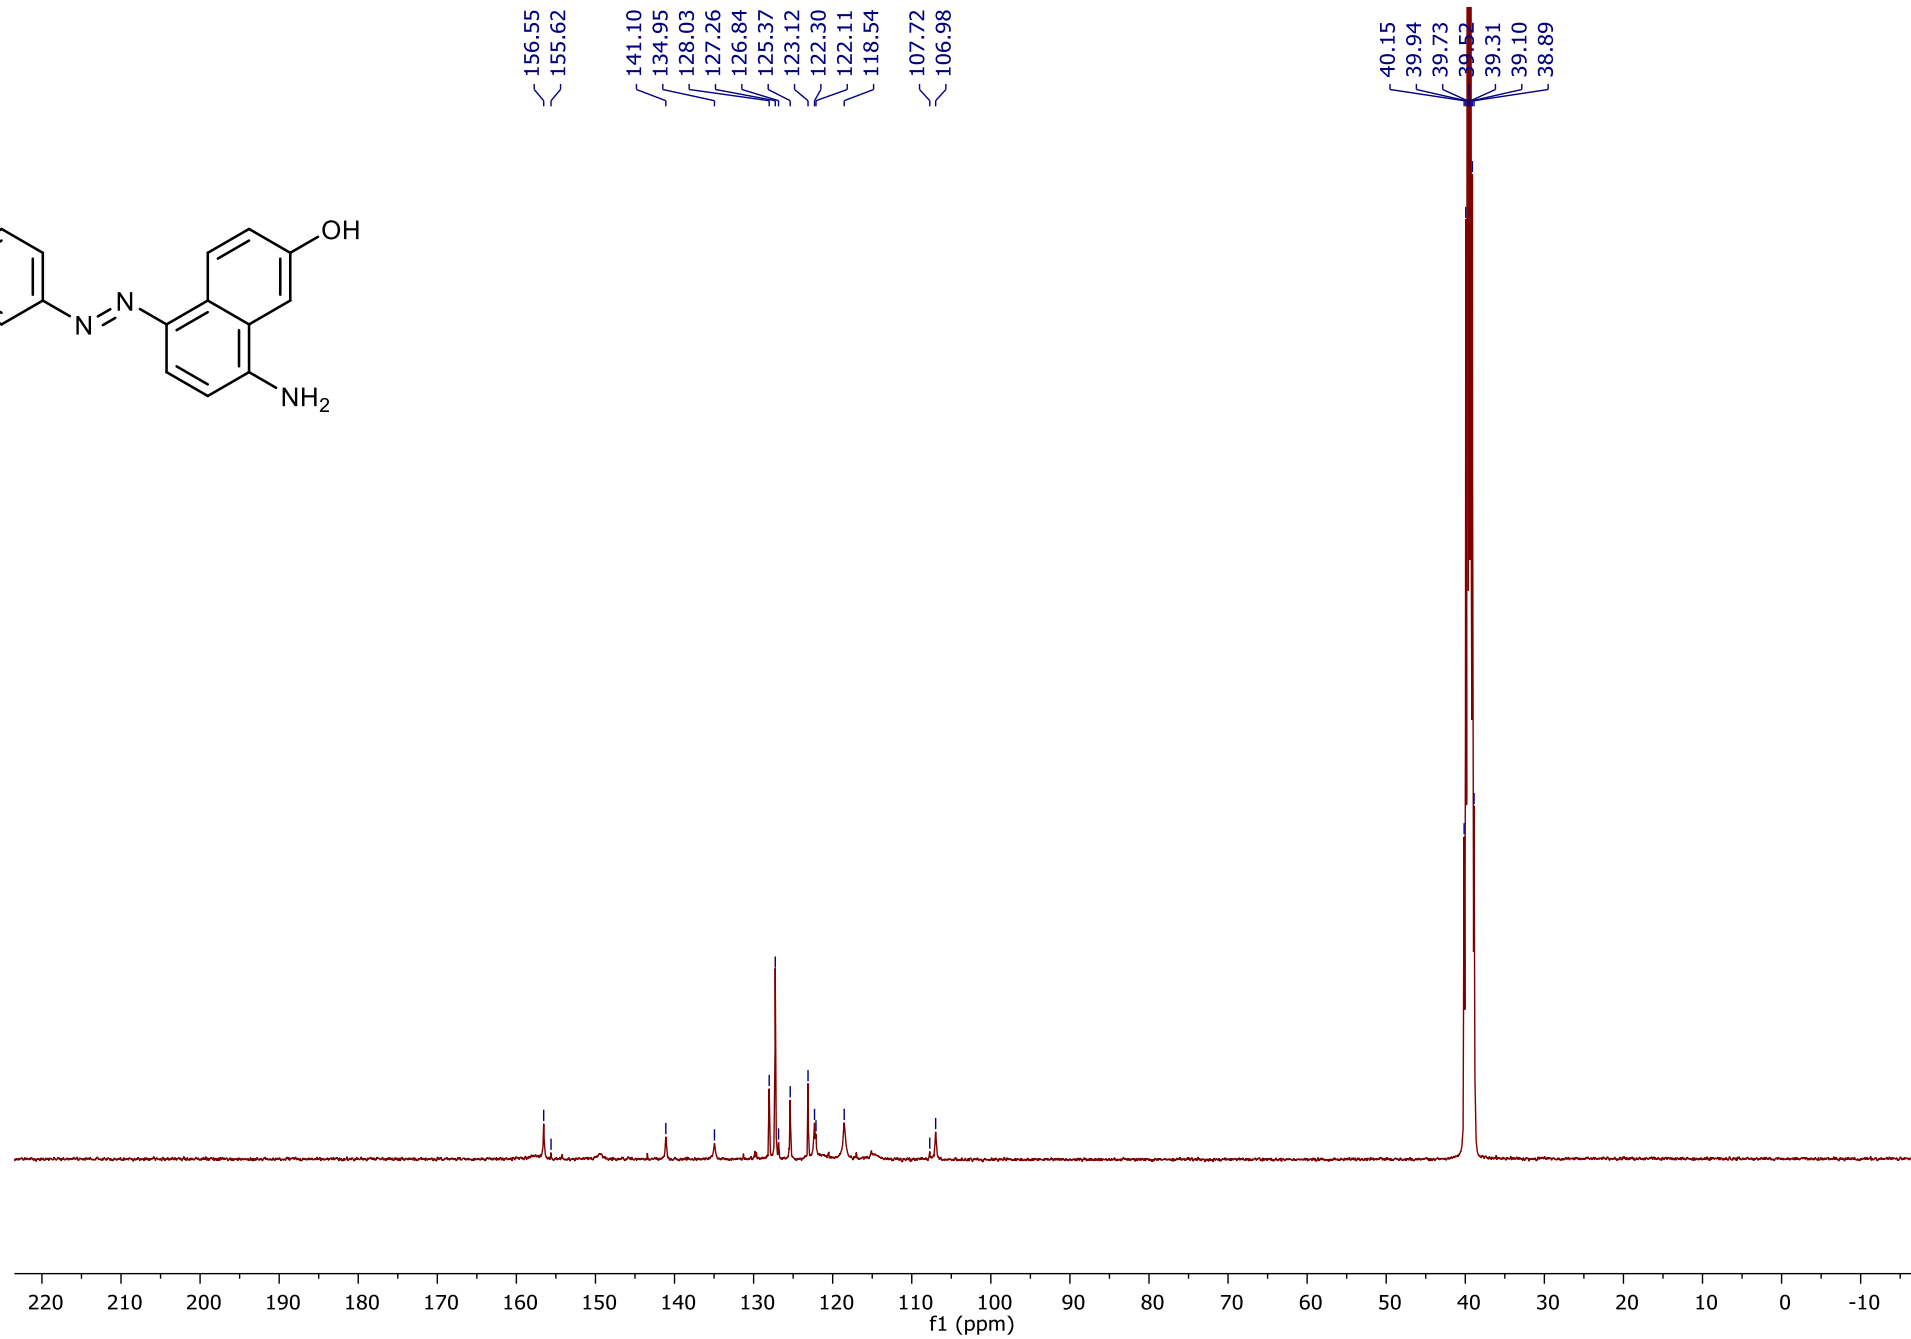

S4.  $^{13}\text{C}$  NMR of Compound 14

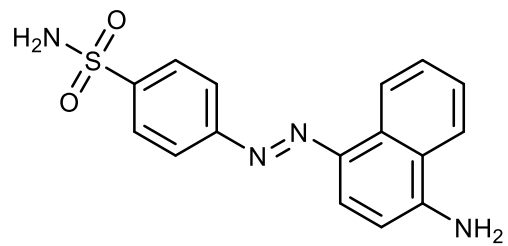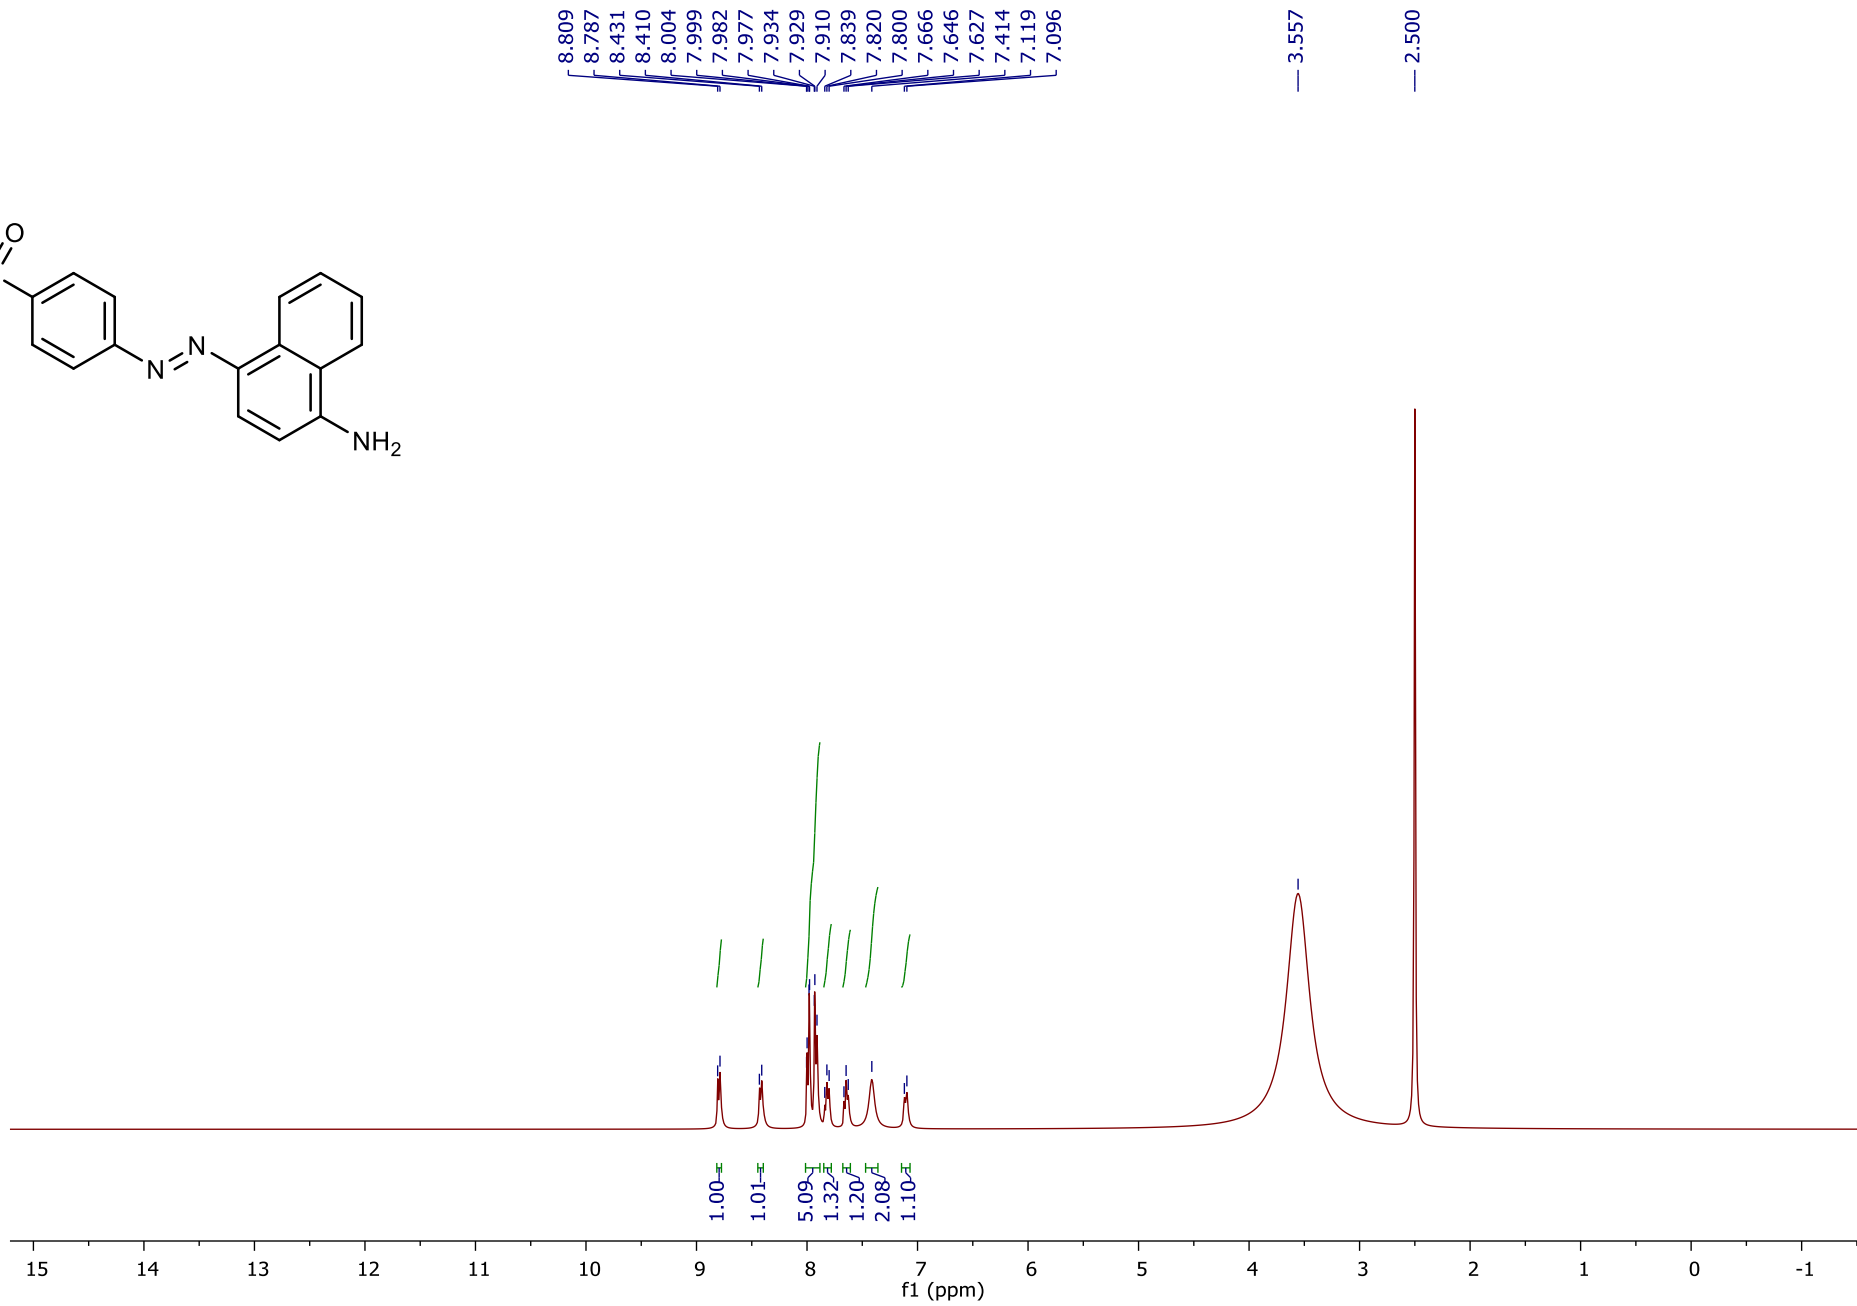

S5: <sup>1</sup>H NMR of Compound 15

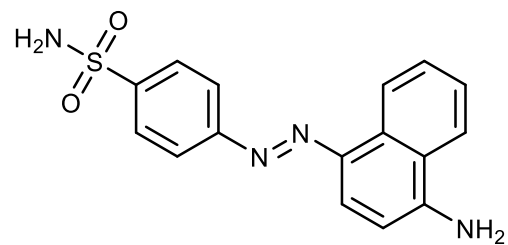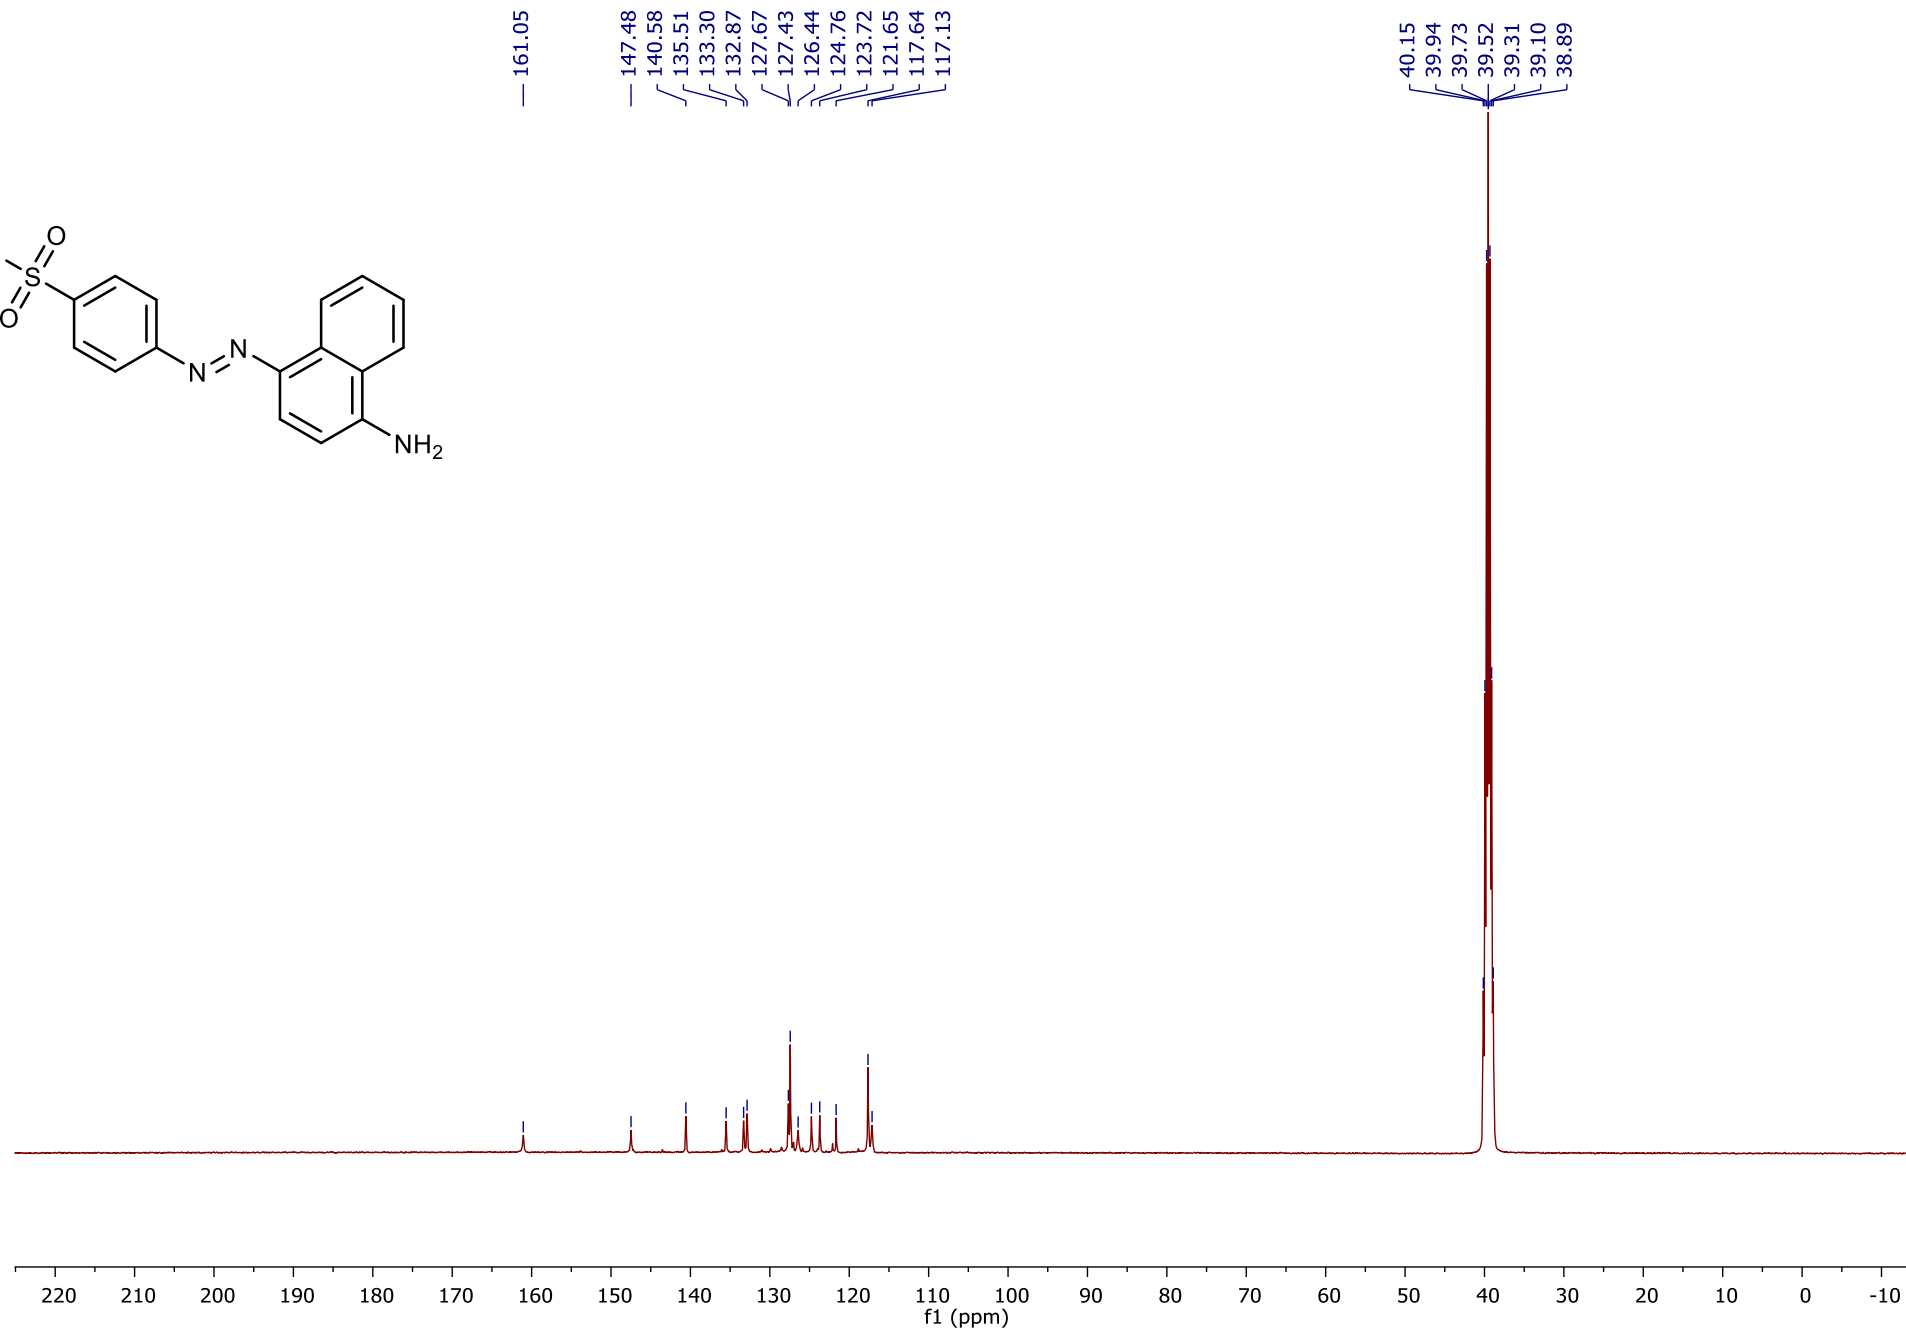

S6. <sup>13</sup>C NMR of Compound 15

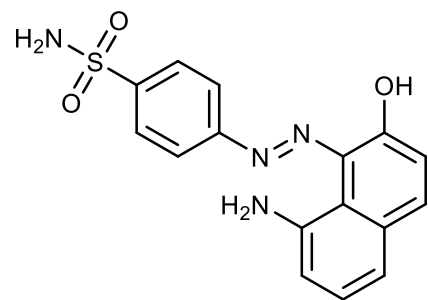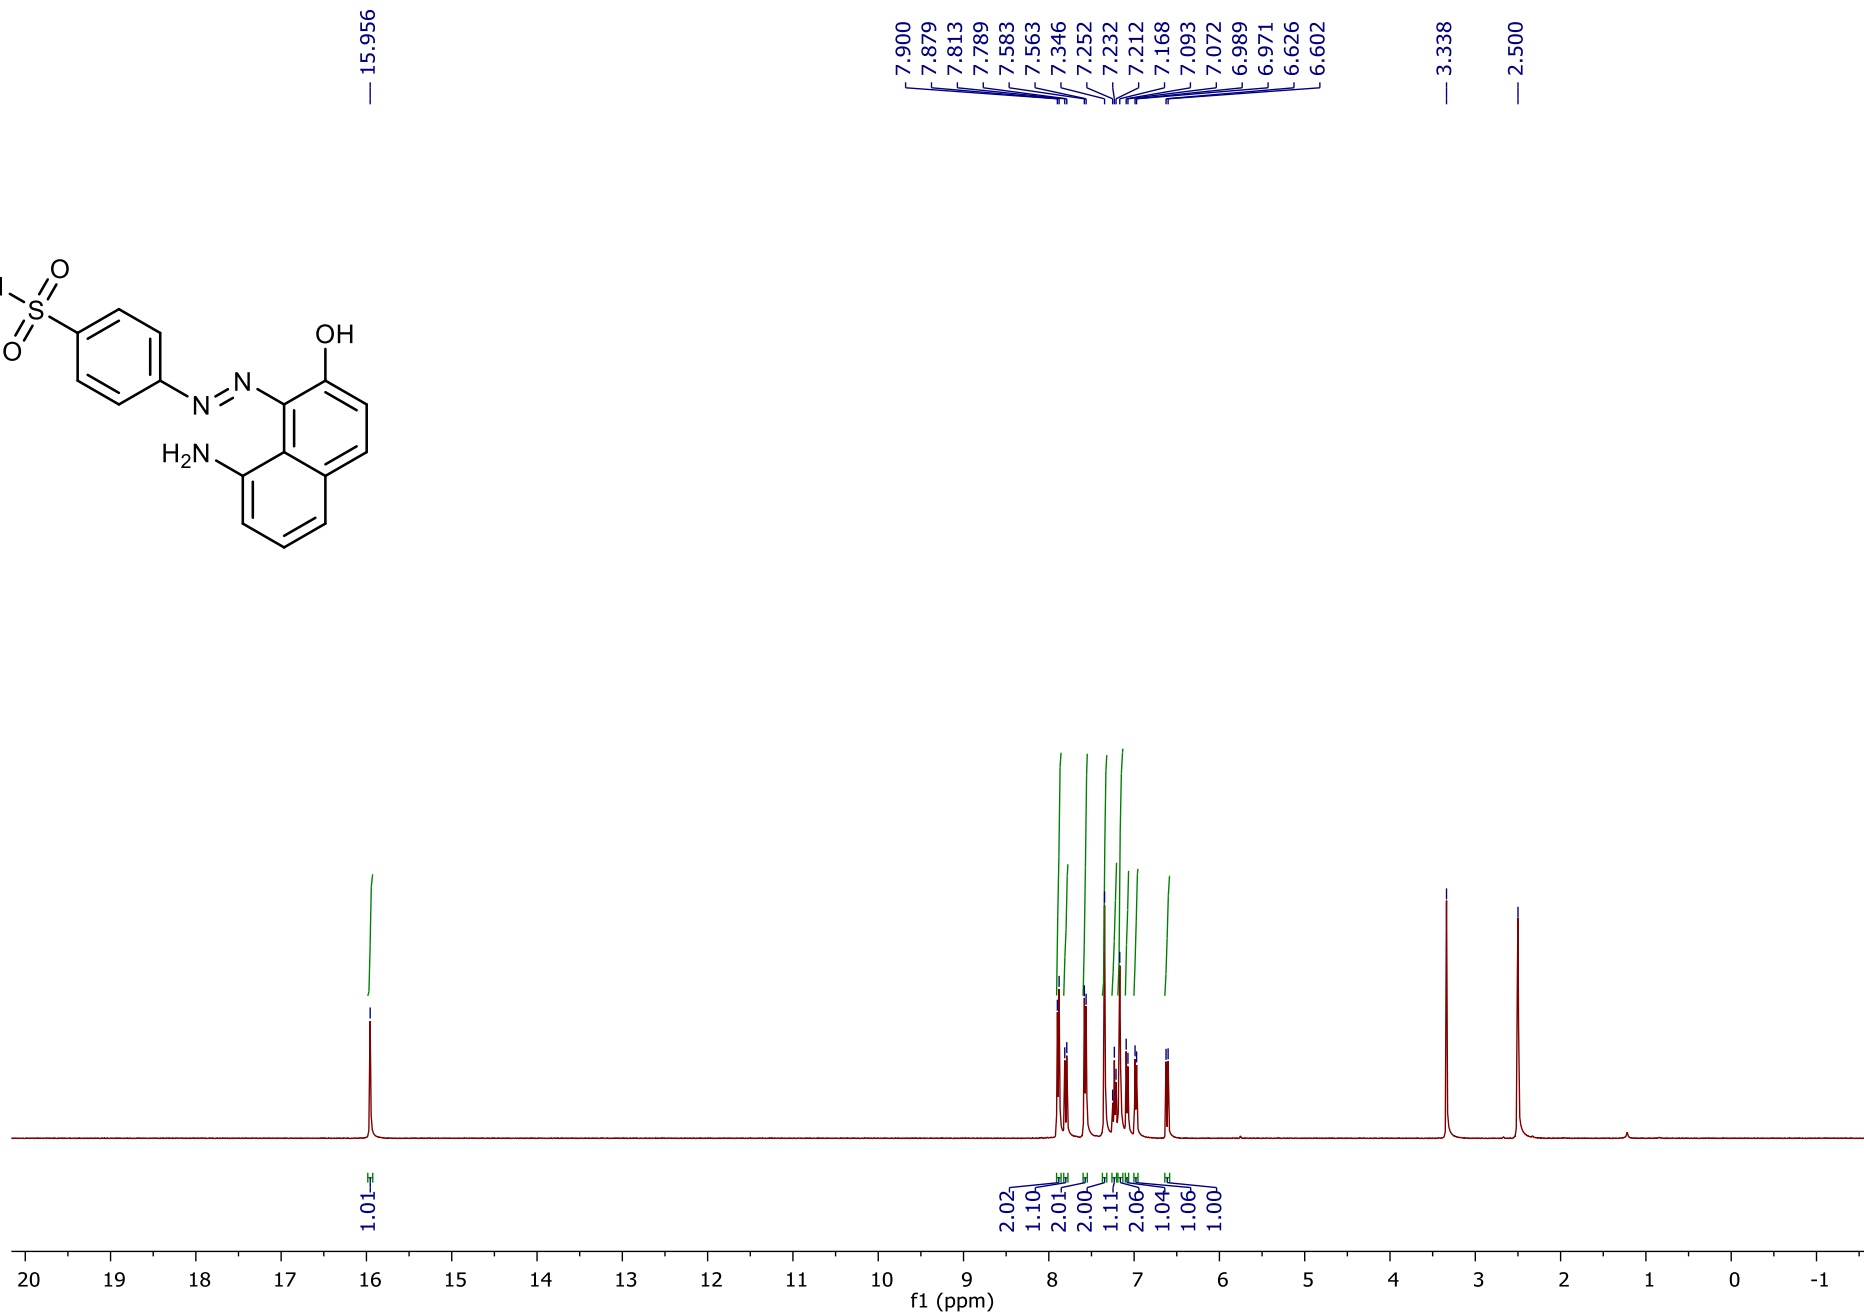

S7: <sup>1</sup>H NMR of Compound 16



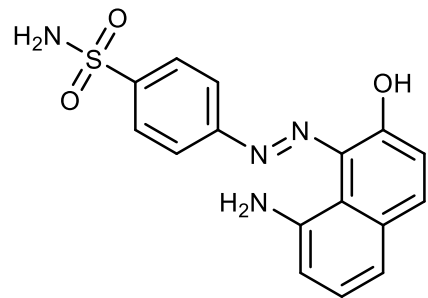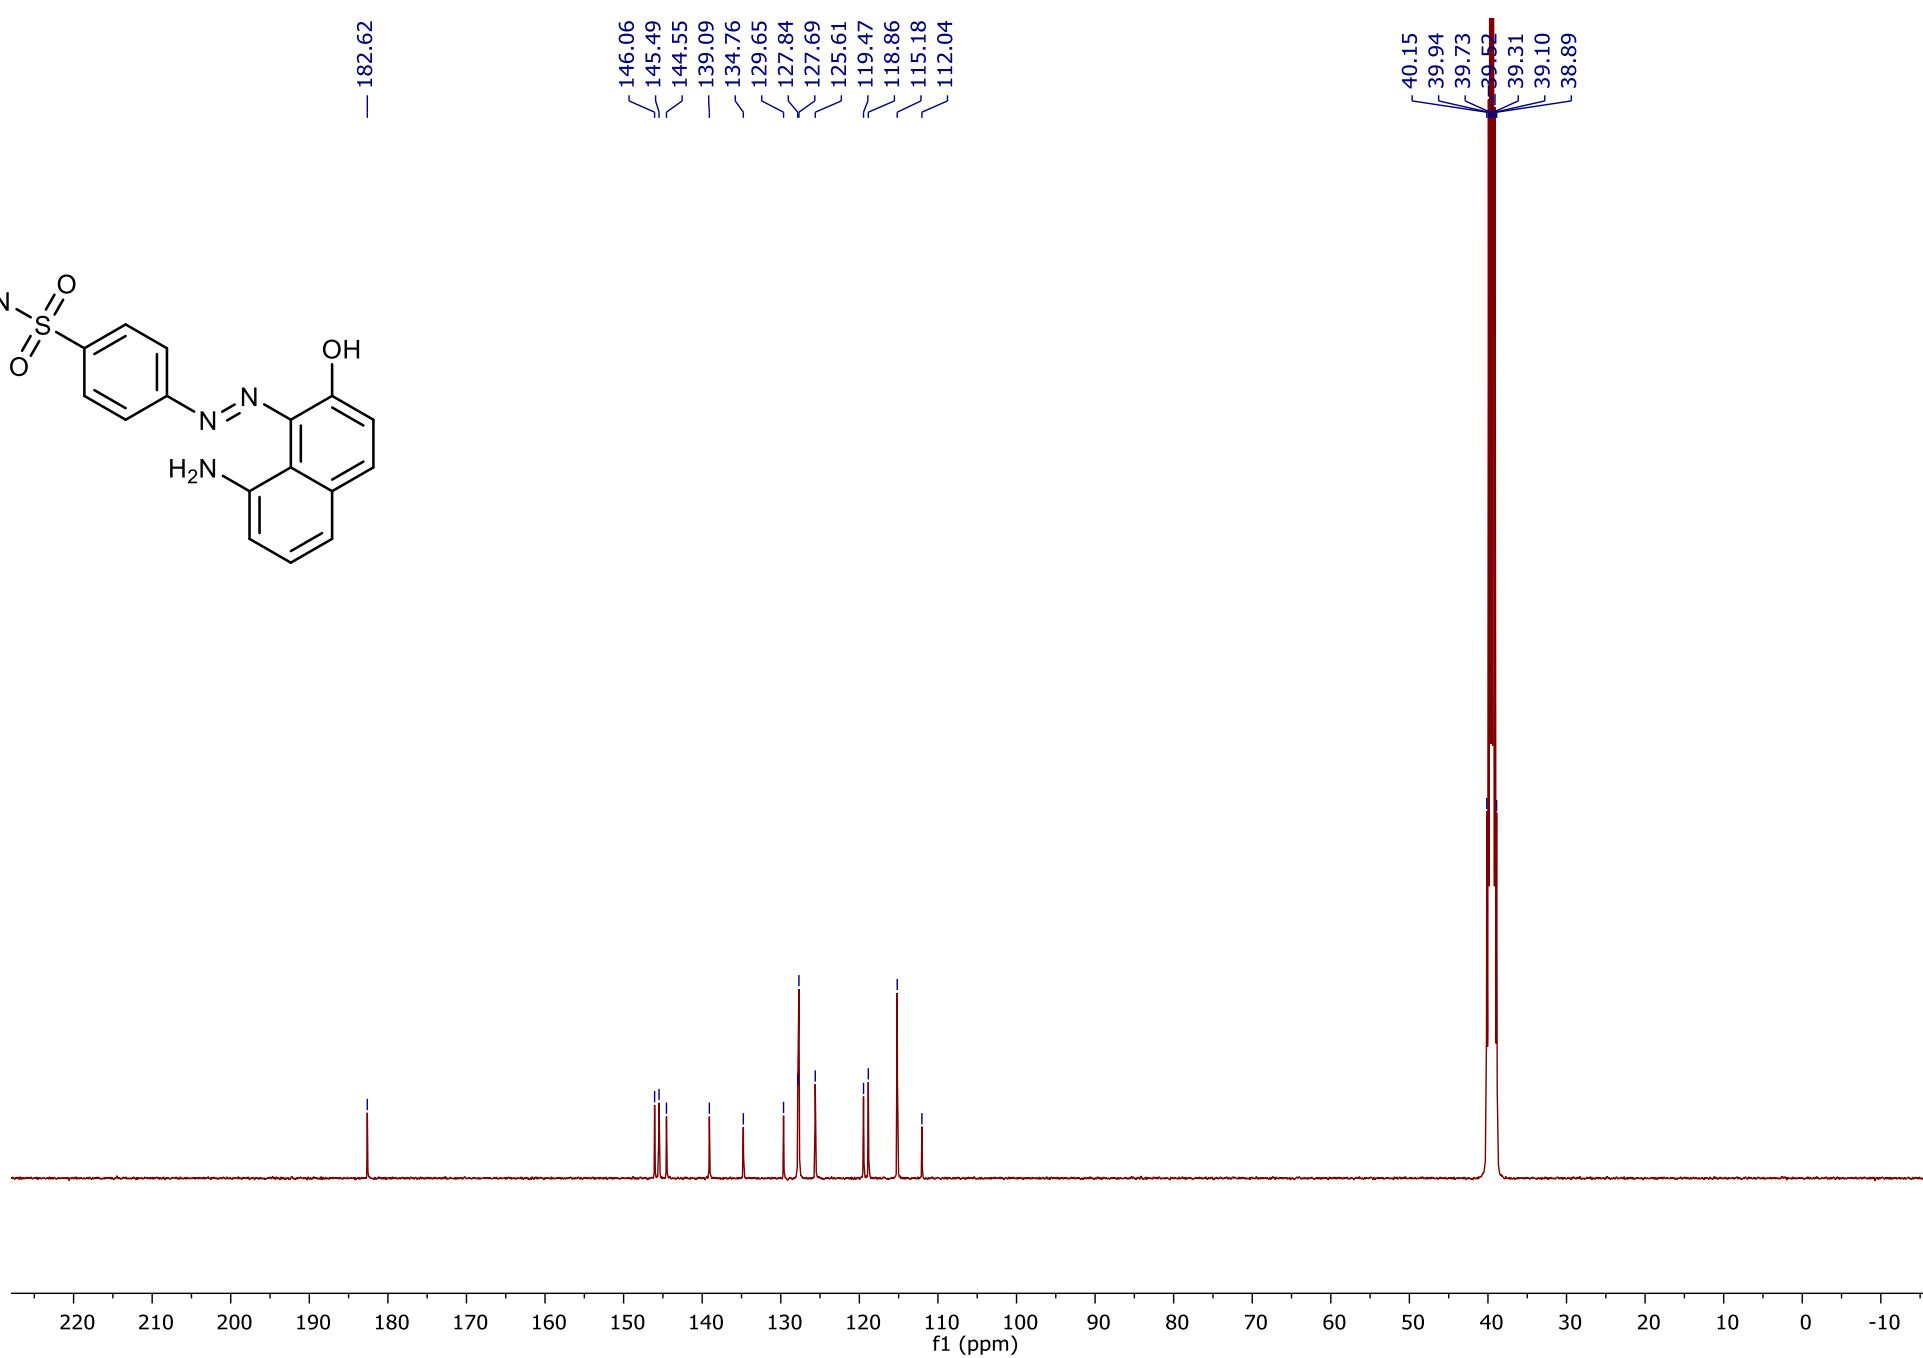

S8. <sup>13</sup>C NMR of Compound 16

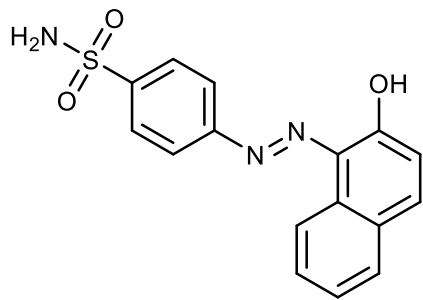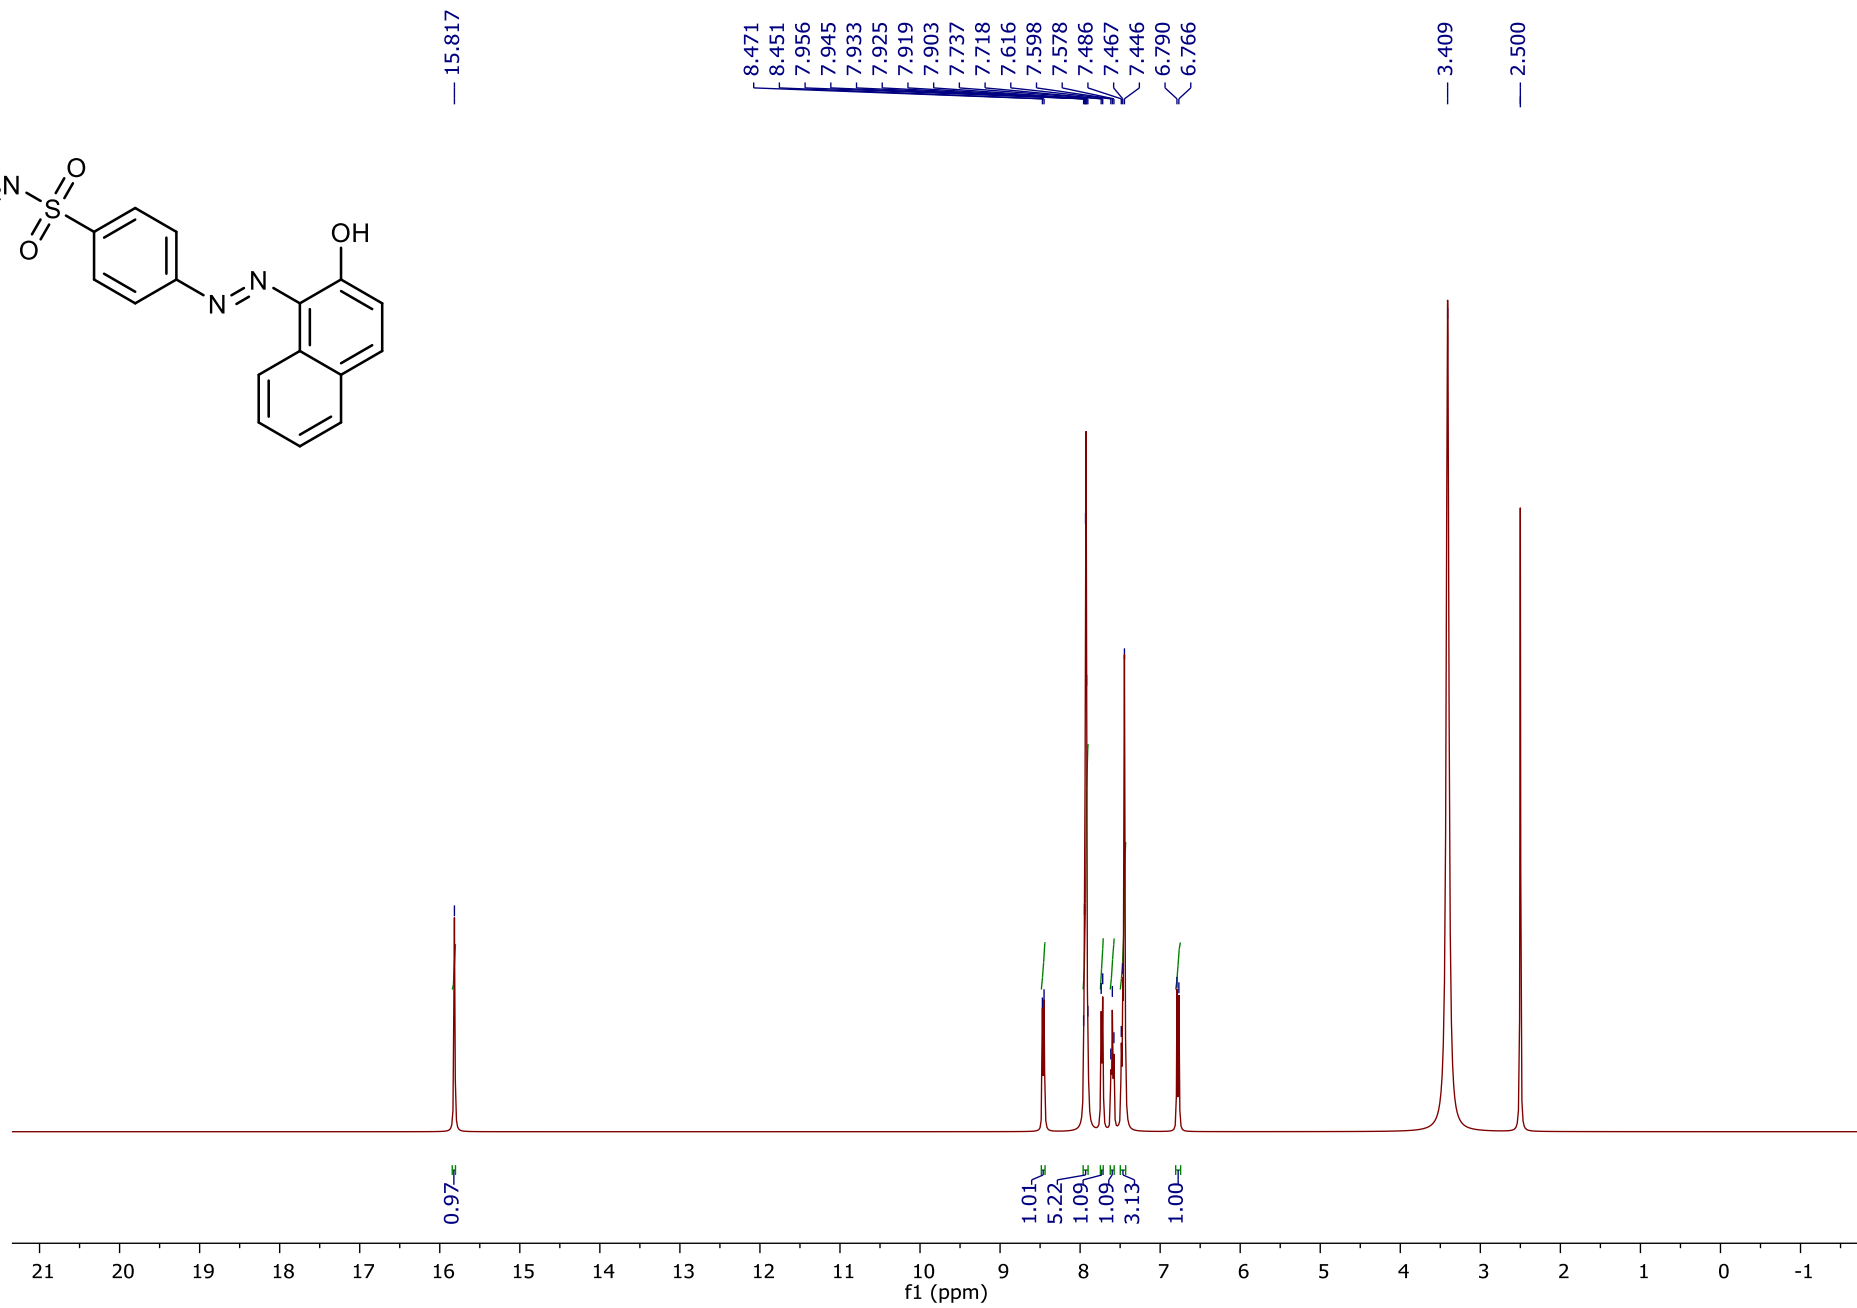

S9: <sup>1</sup>H NMR of Compound 17

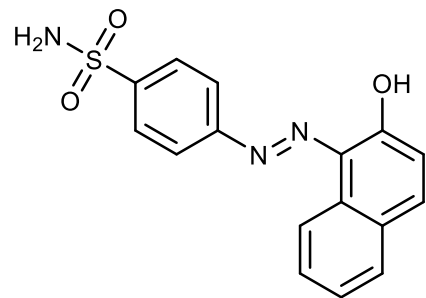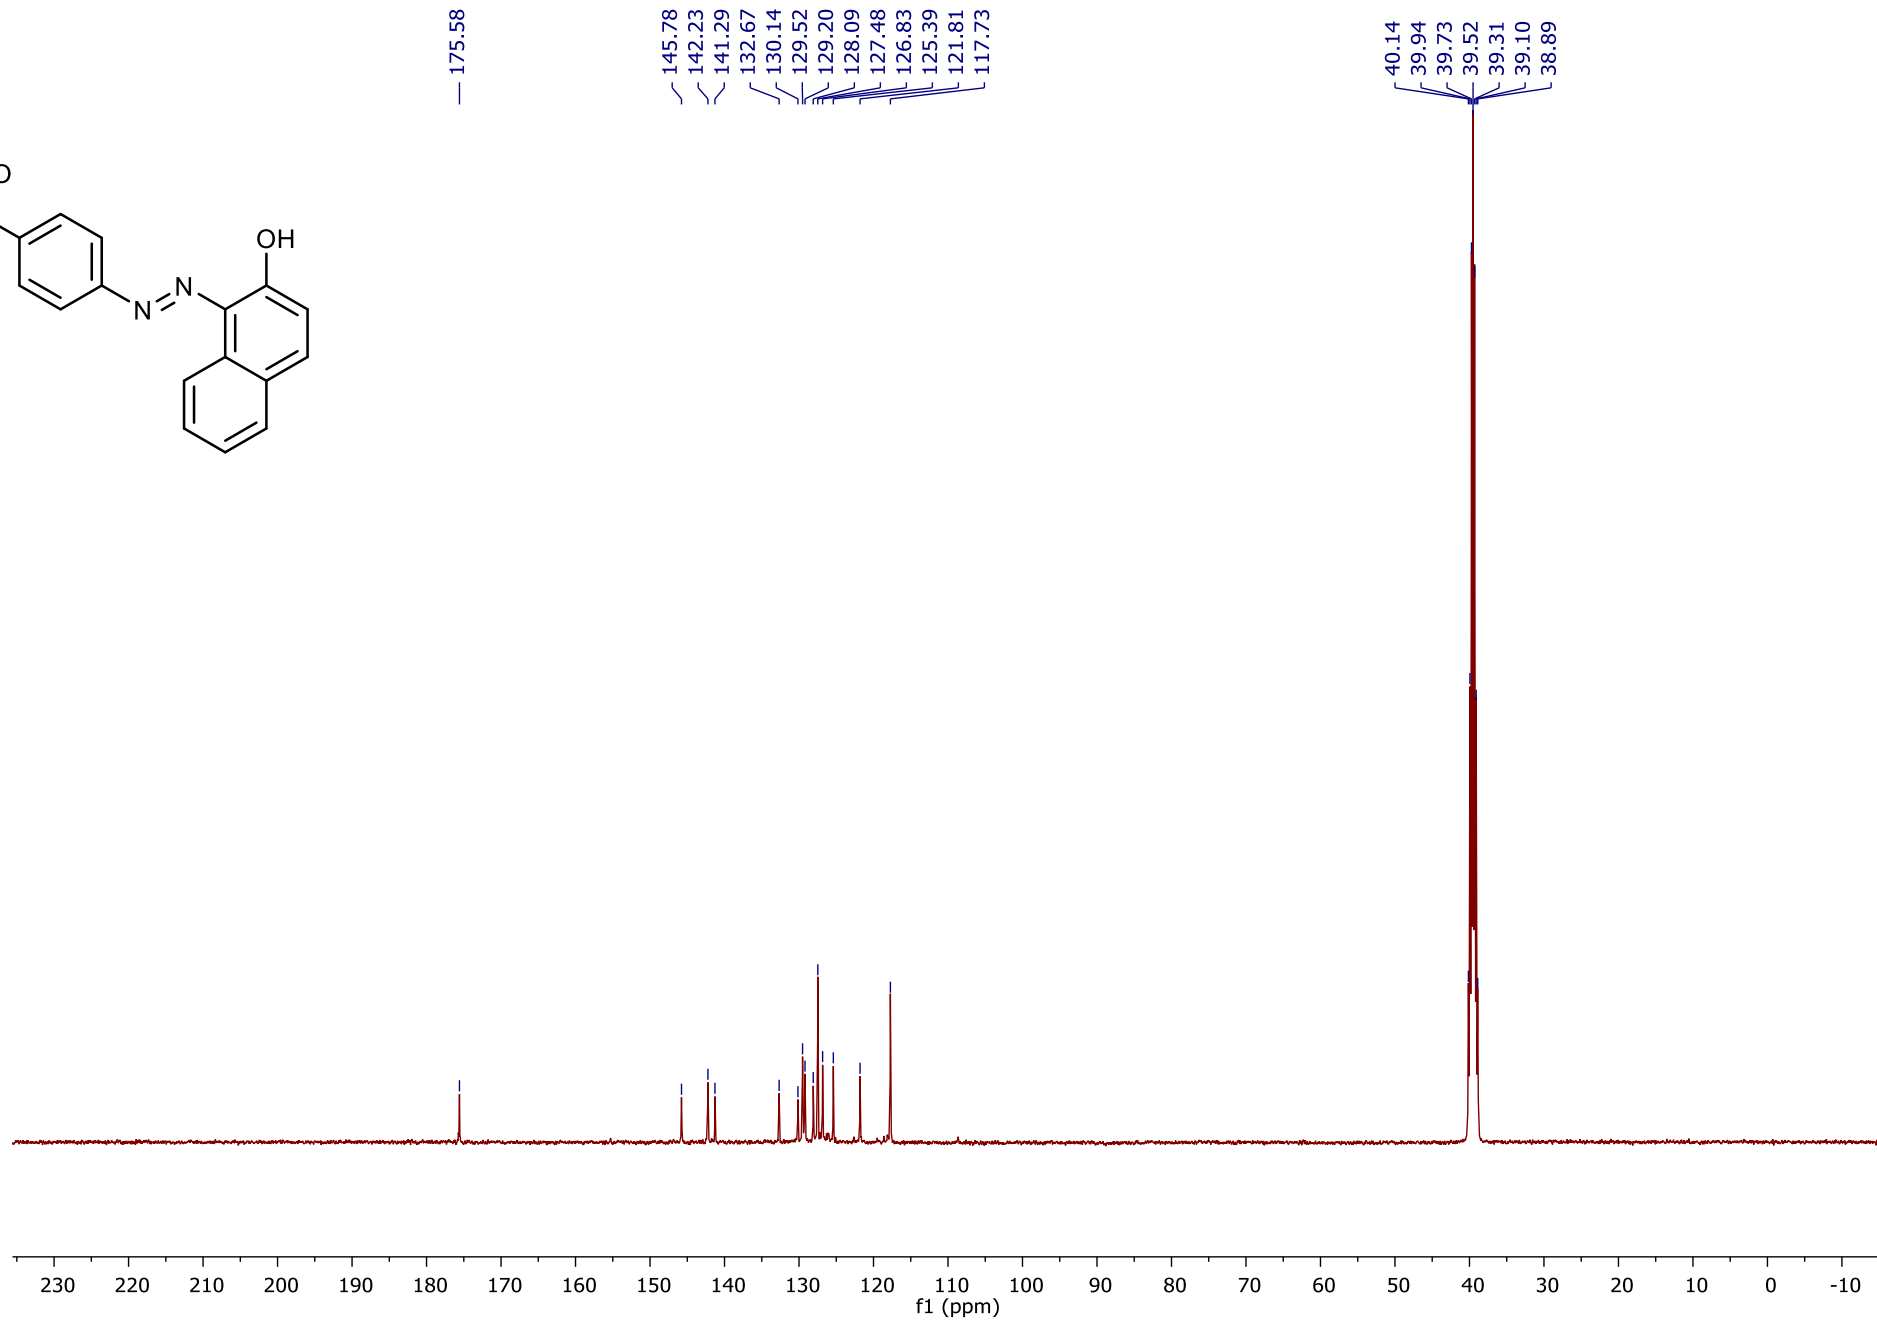

S10. <sup>13</sup>C NMR of Compound 17

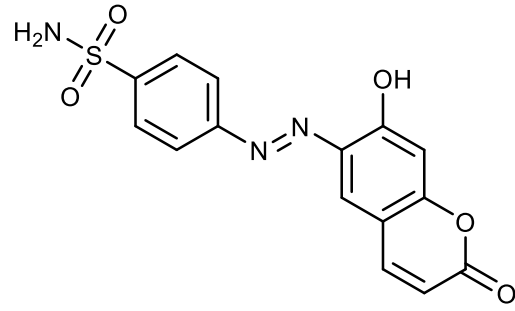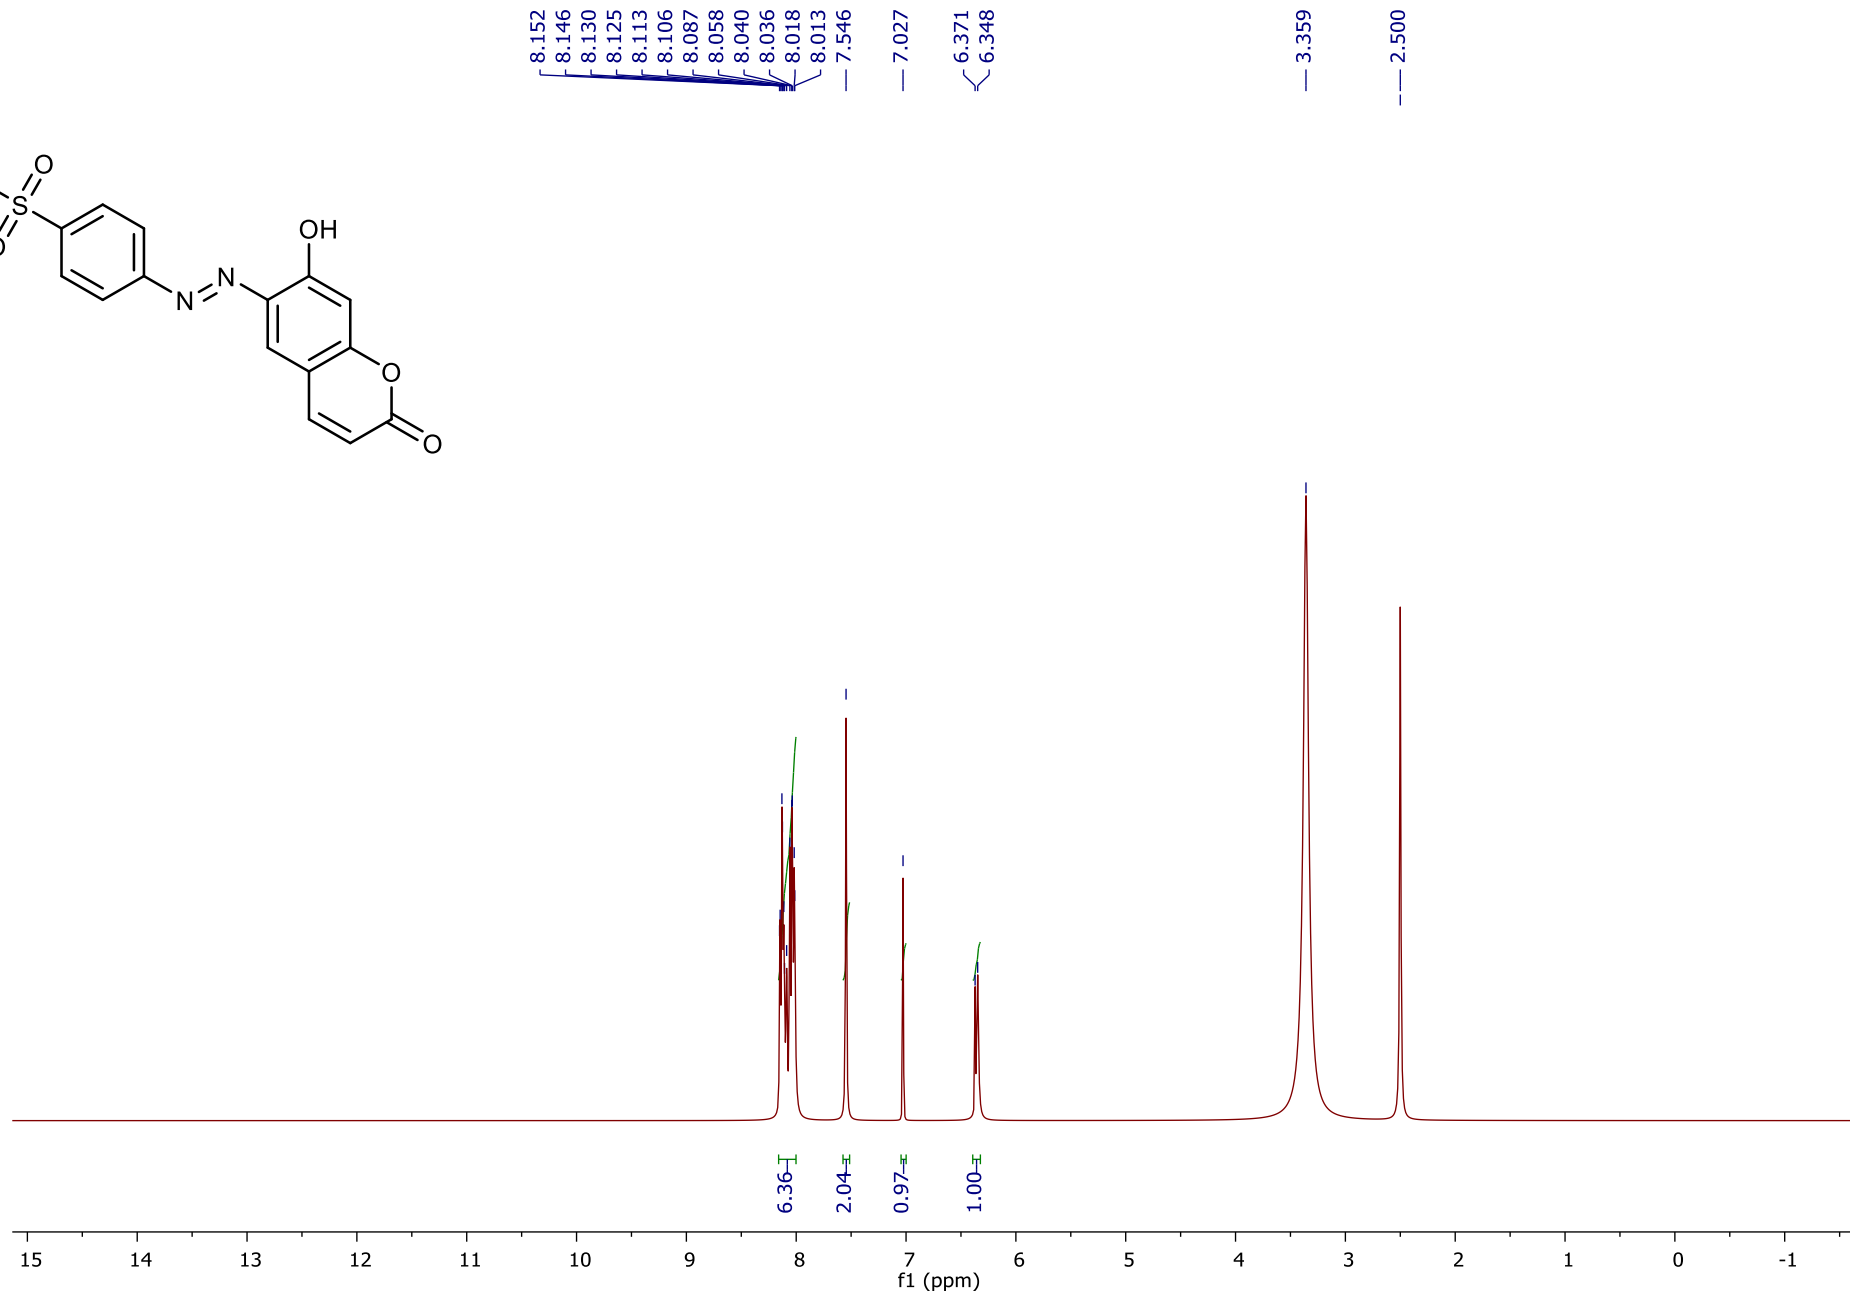

**S11:** <sup>1</sup>H NMR of Compound 18

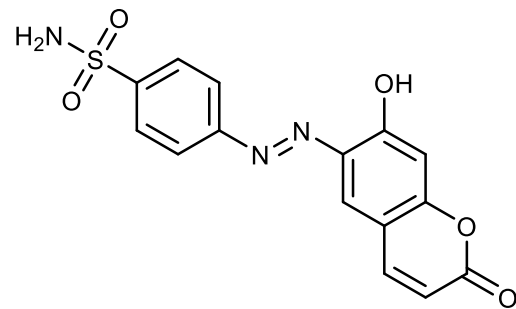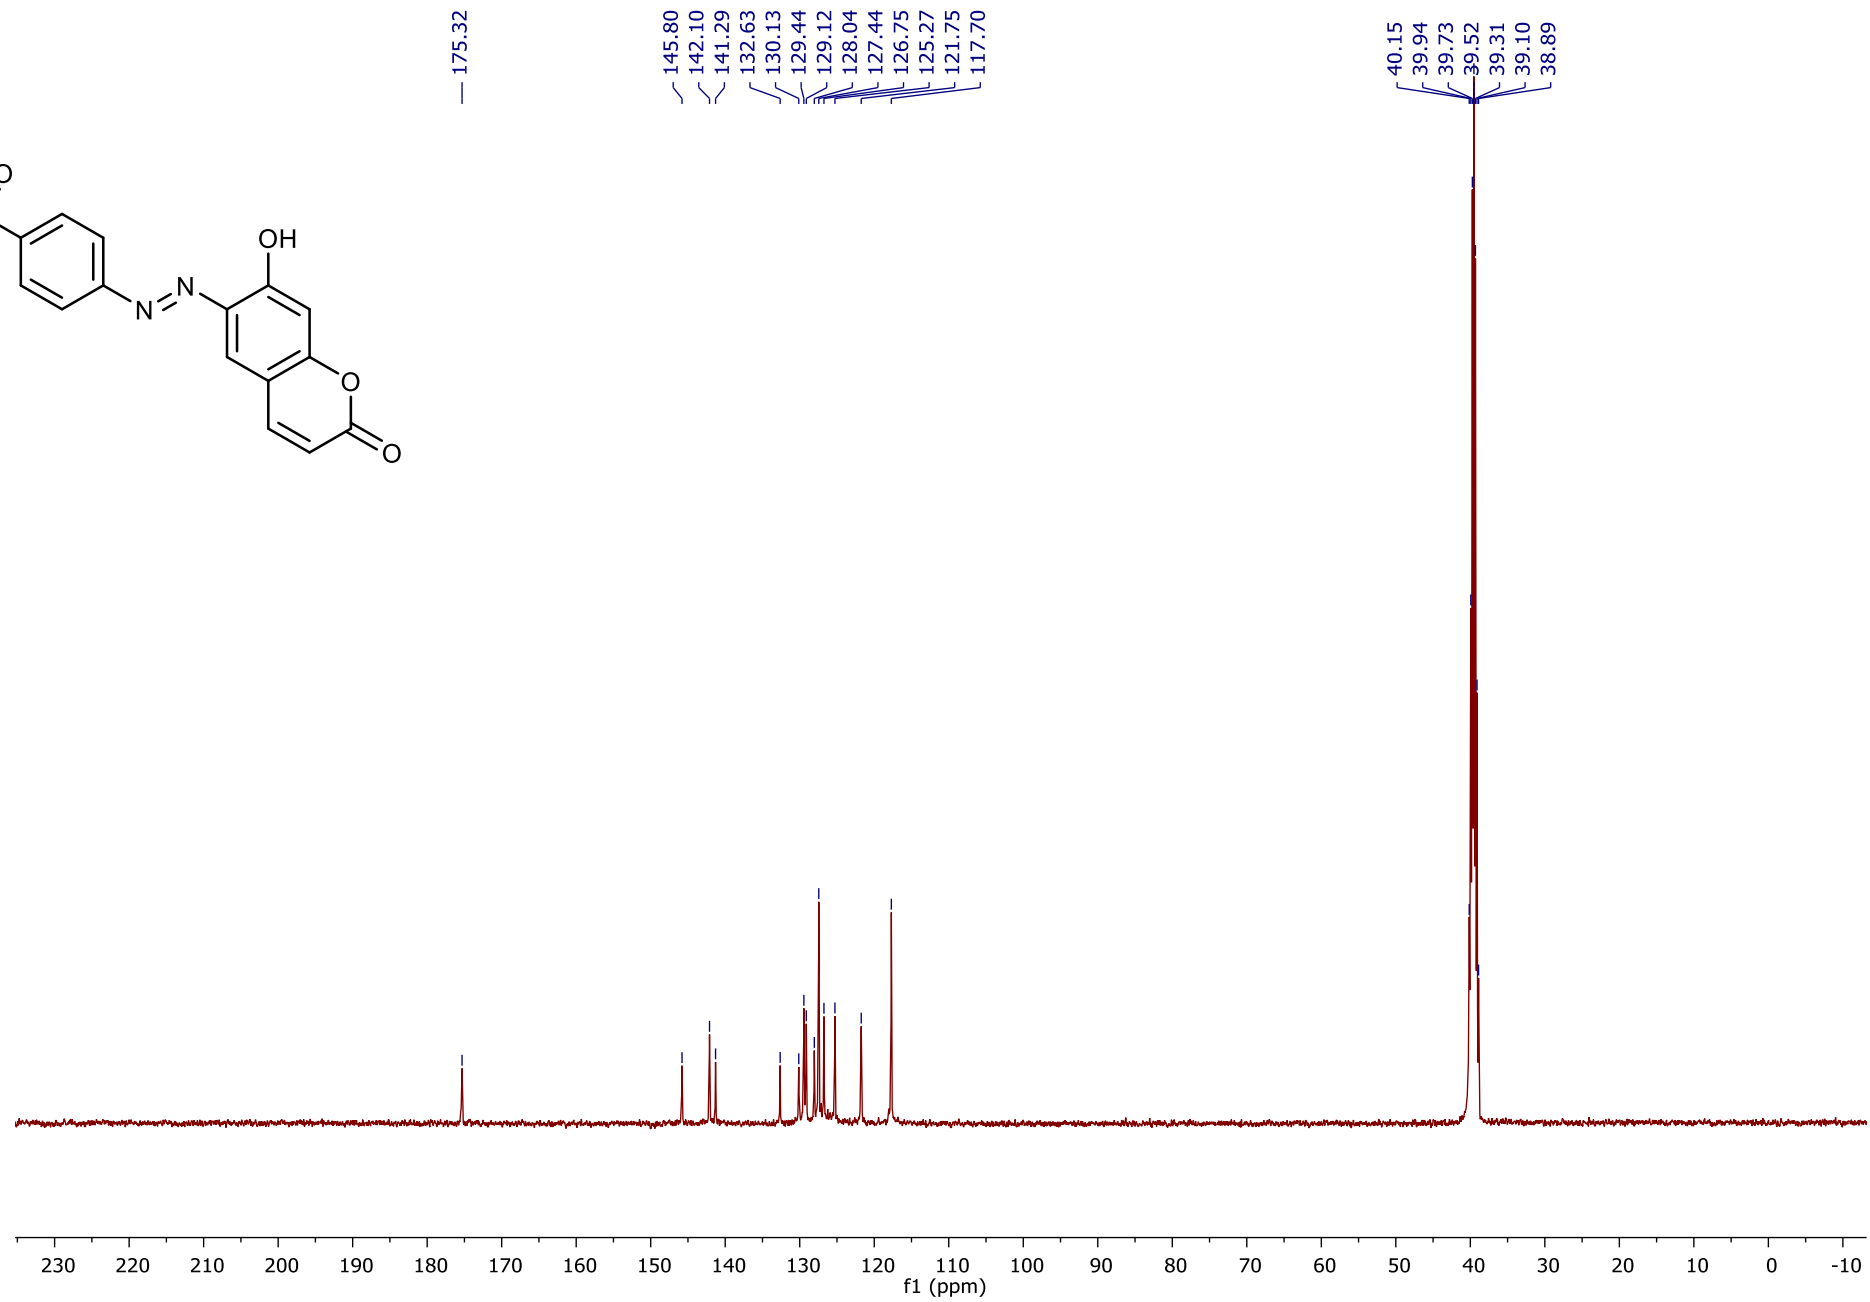

S12. <sup>13</sup>C NMR of Compound 18

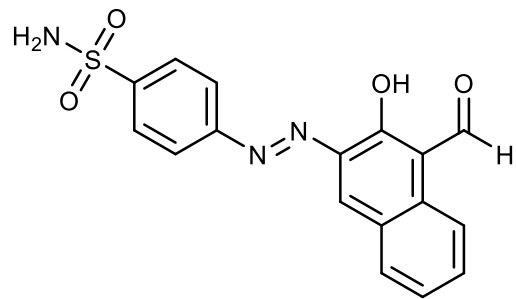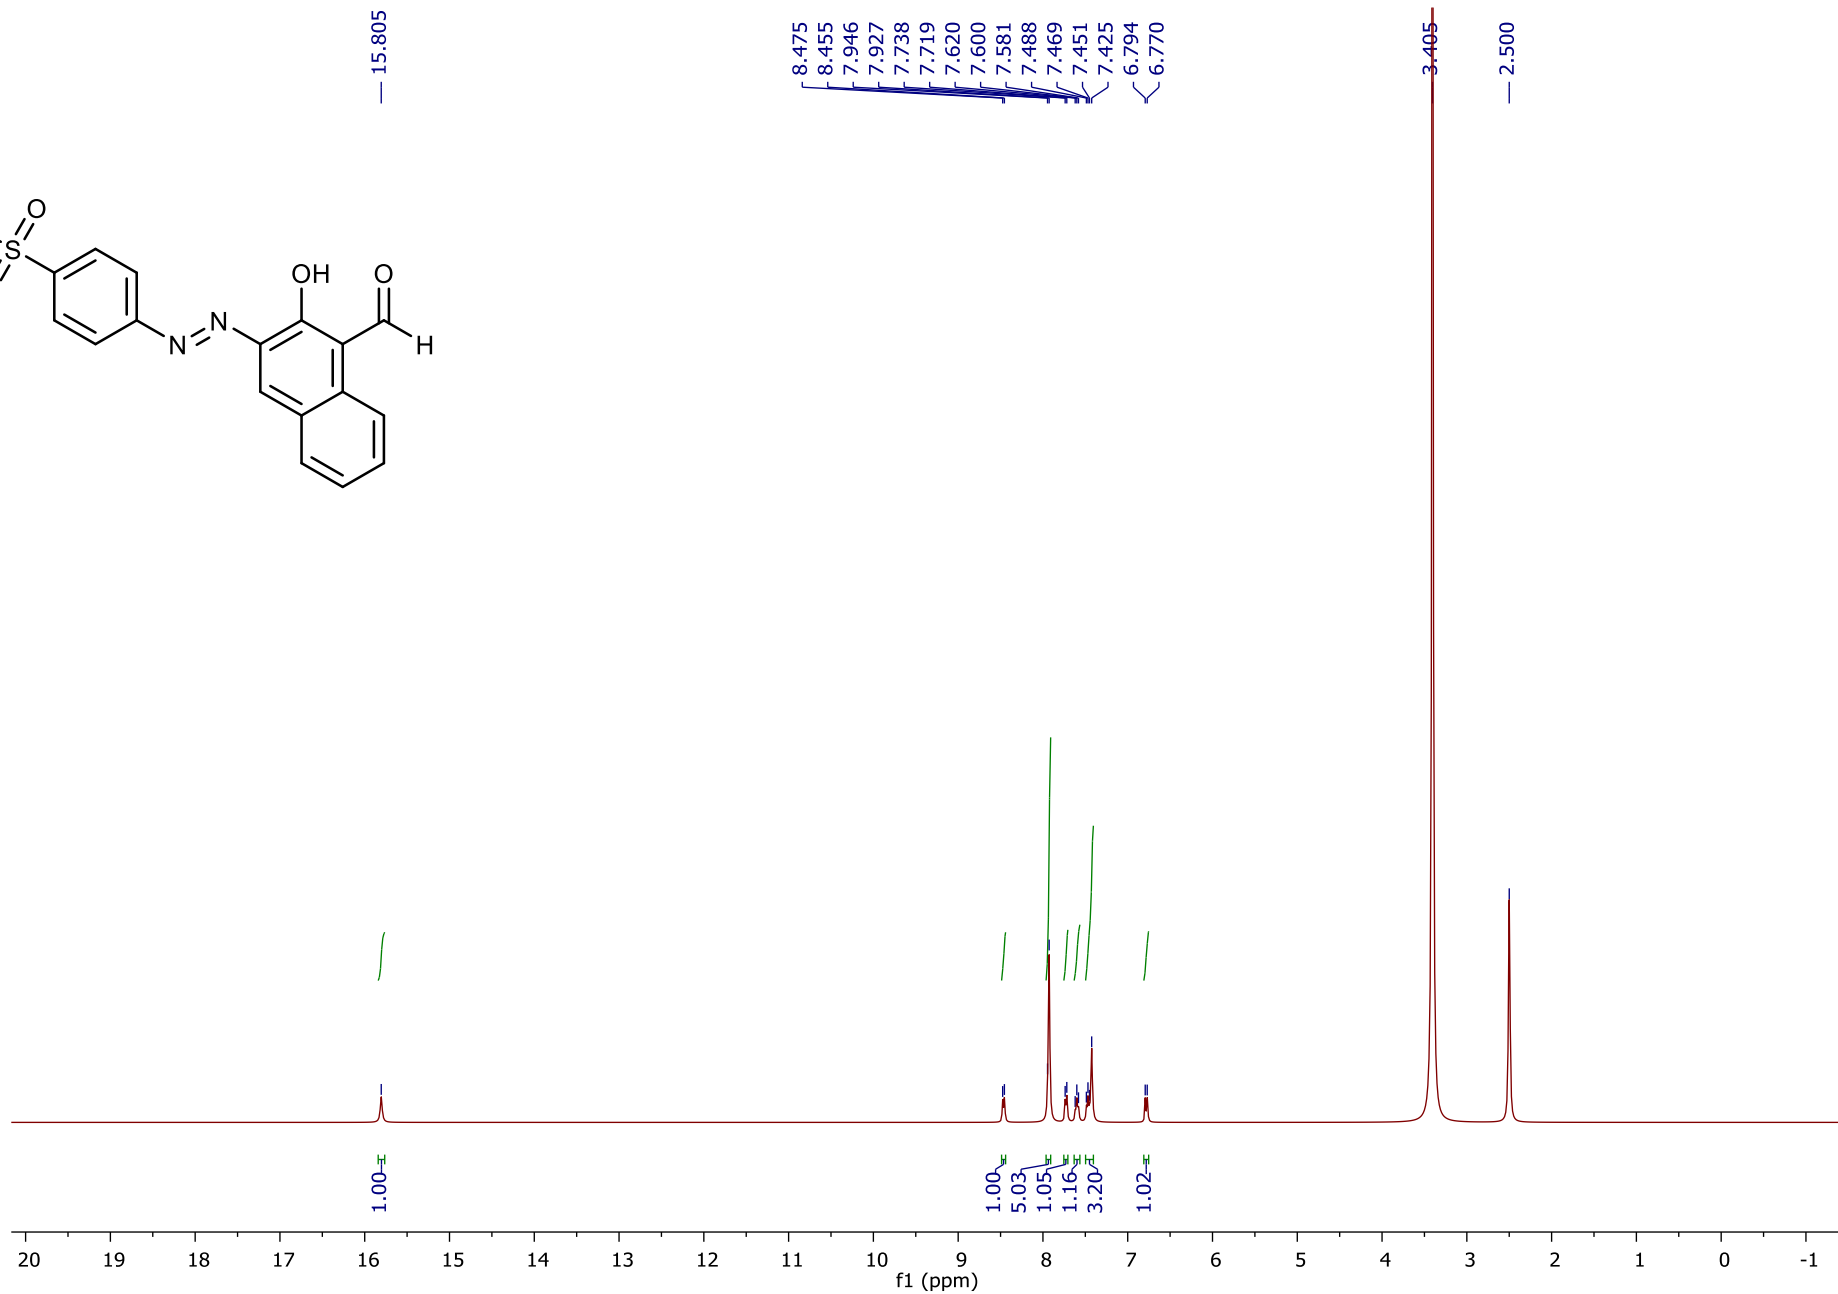

S13:  $^1\text{H}$  NMR of Compound 19

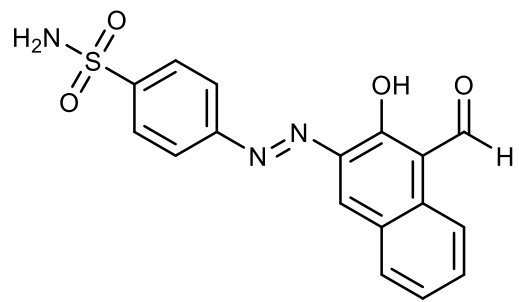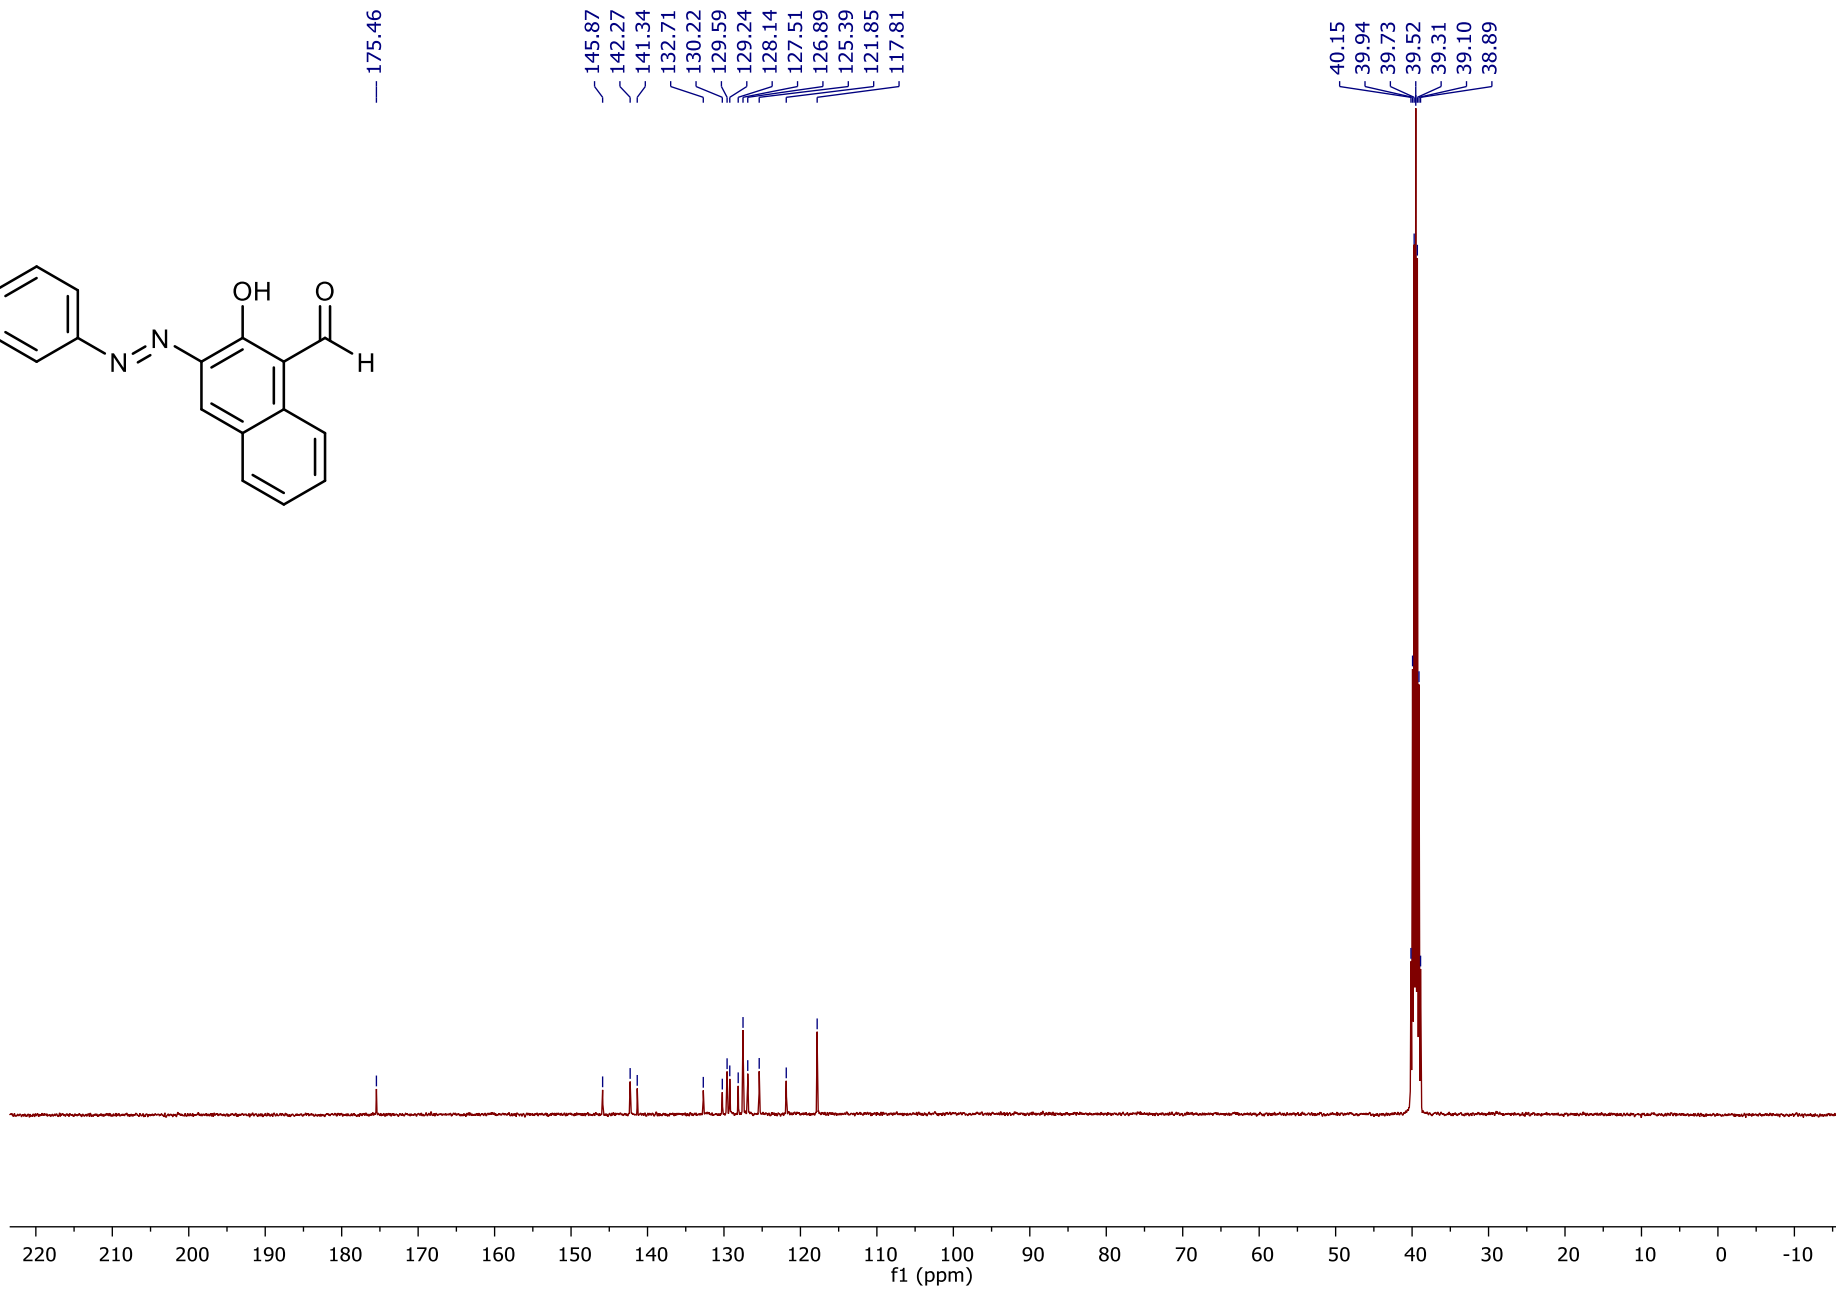

S14.  $^{13}\text{C}$  NMR of Compound 19

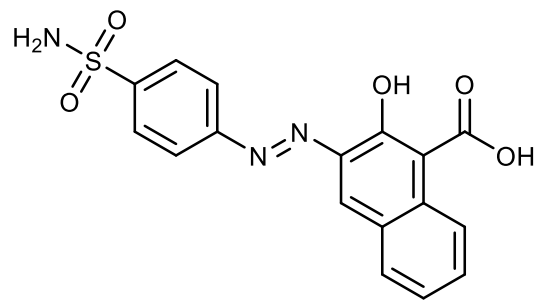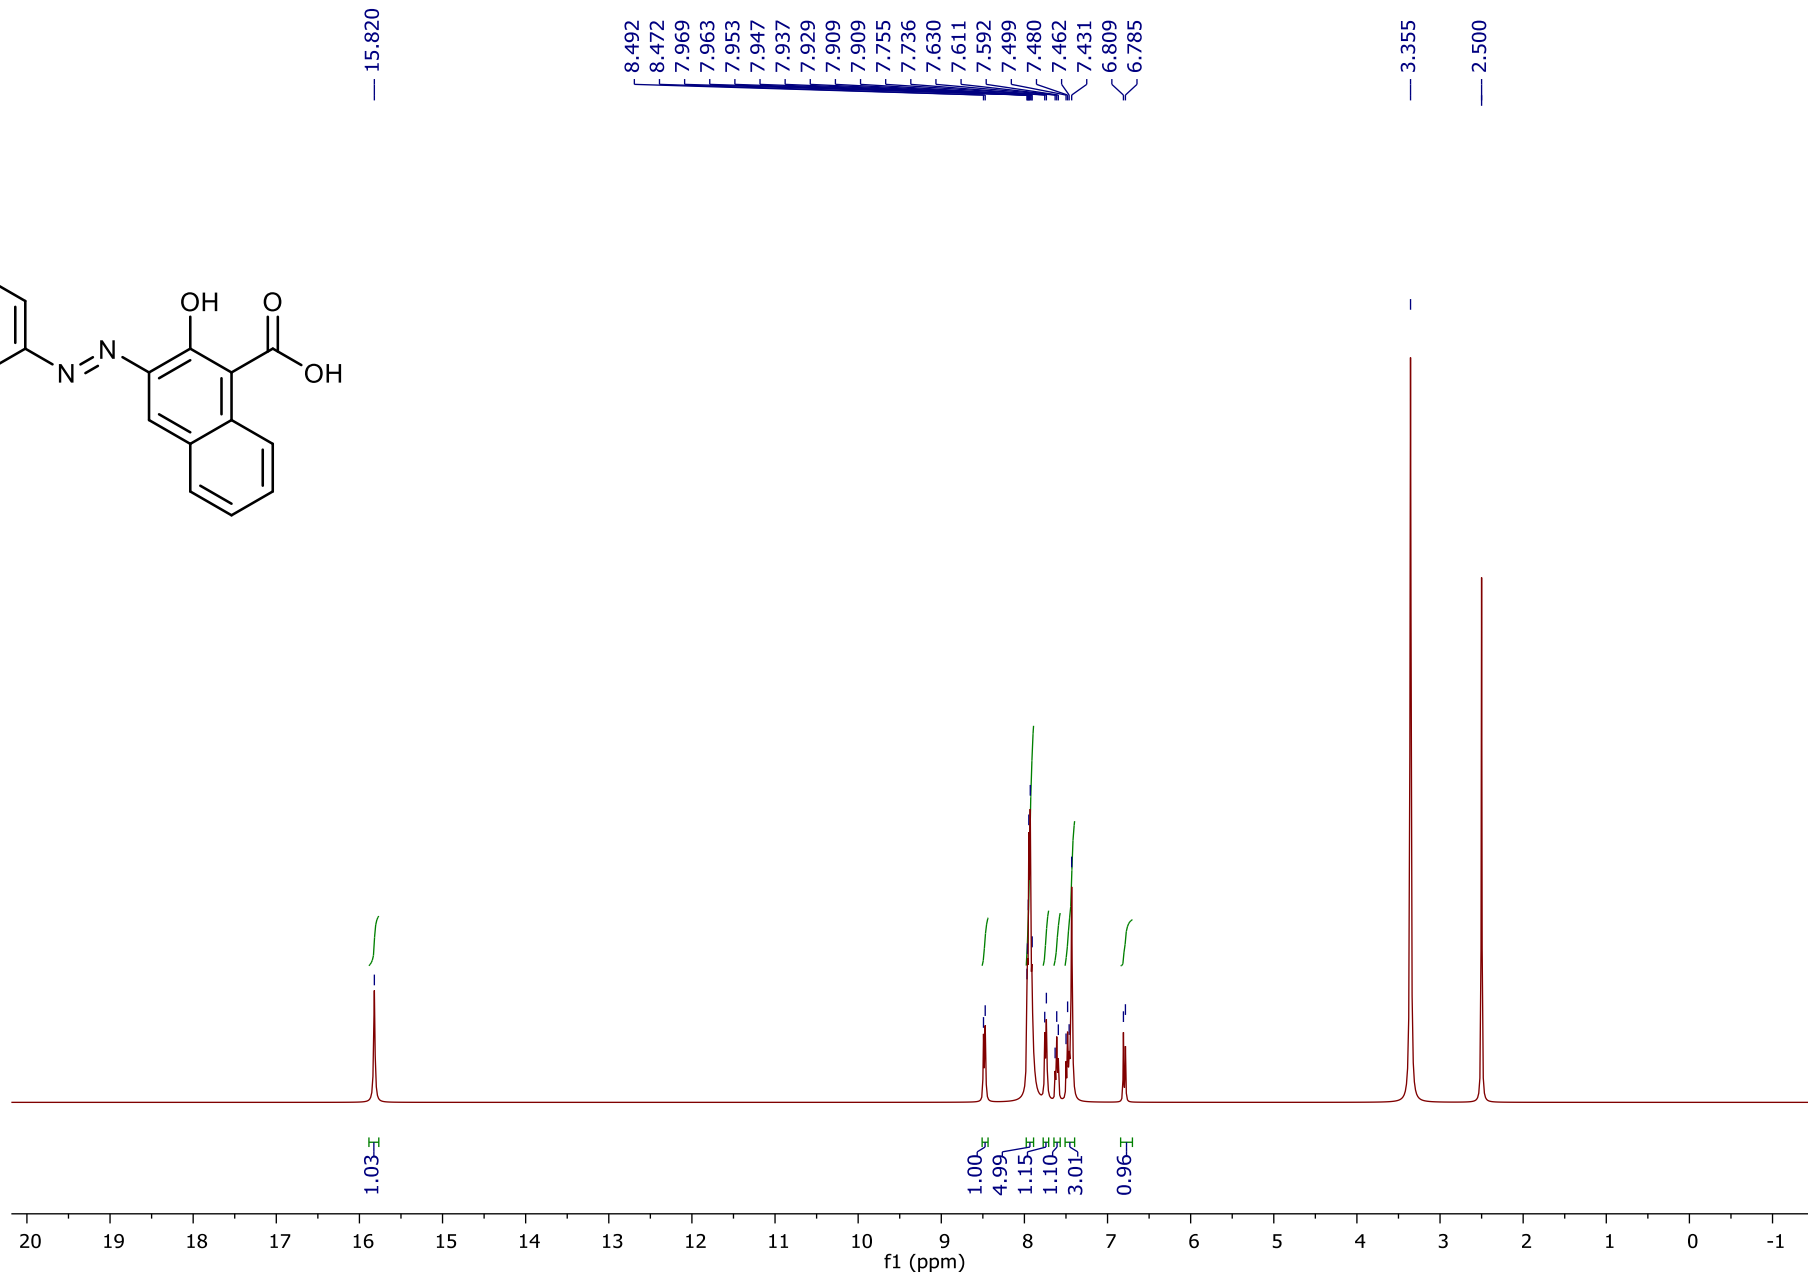

**S15:**  $^1\text{H}$  NMR of Compound **20**



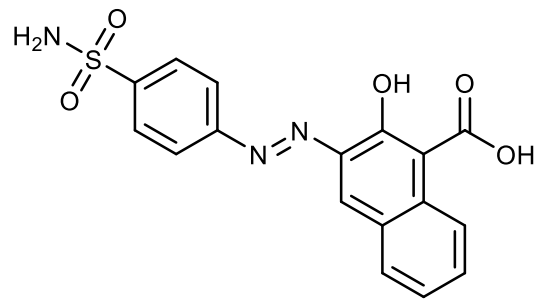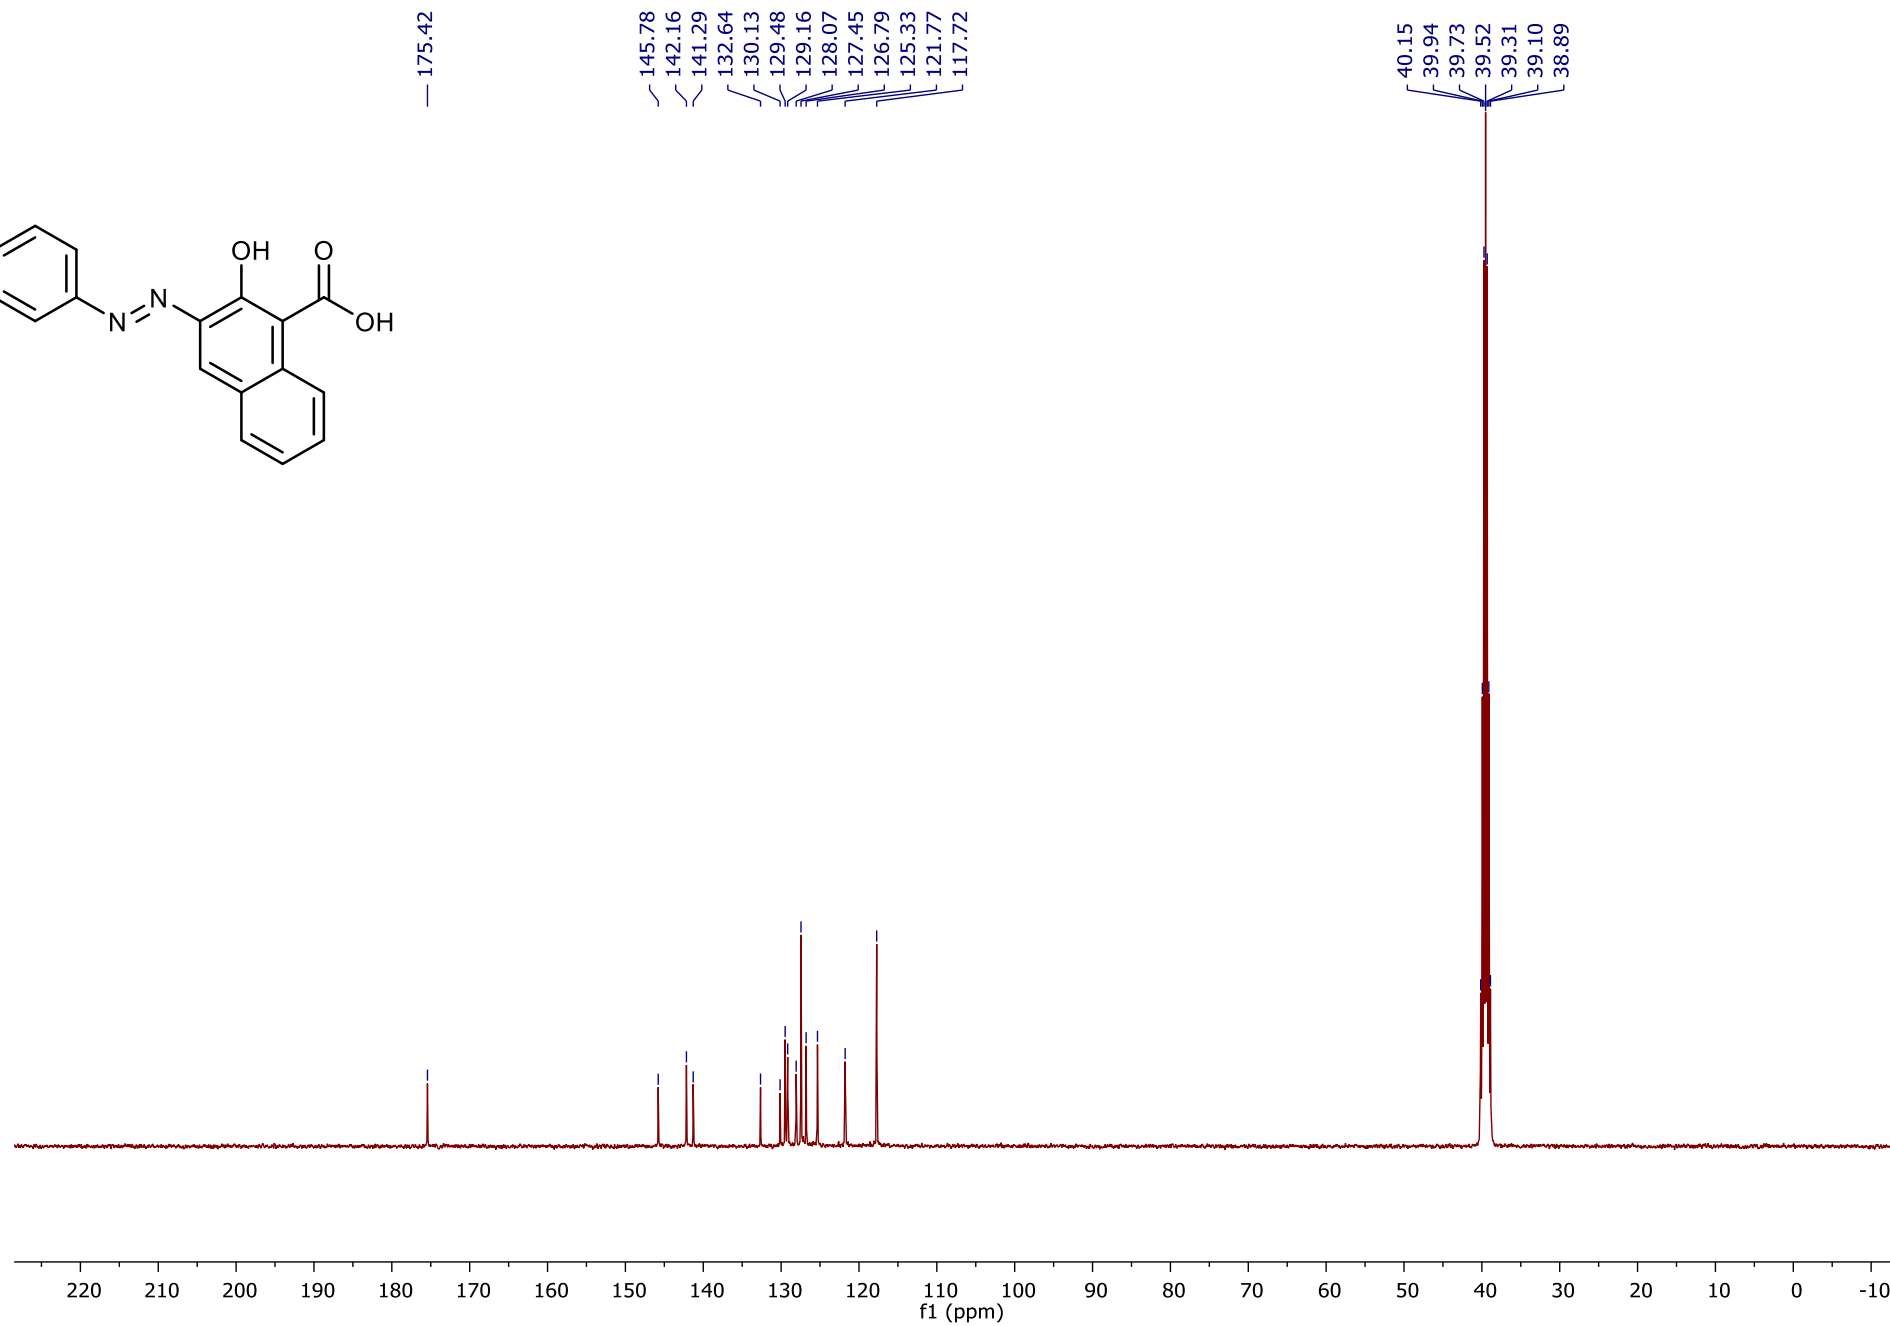

S16. <sup>13</sup>C NMR of Compound 20

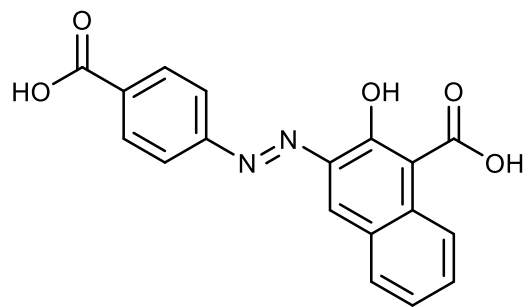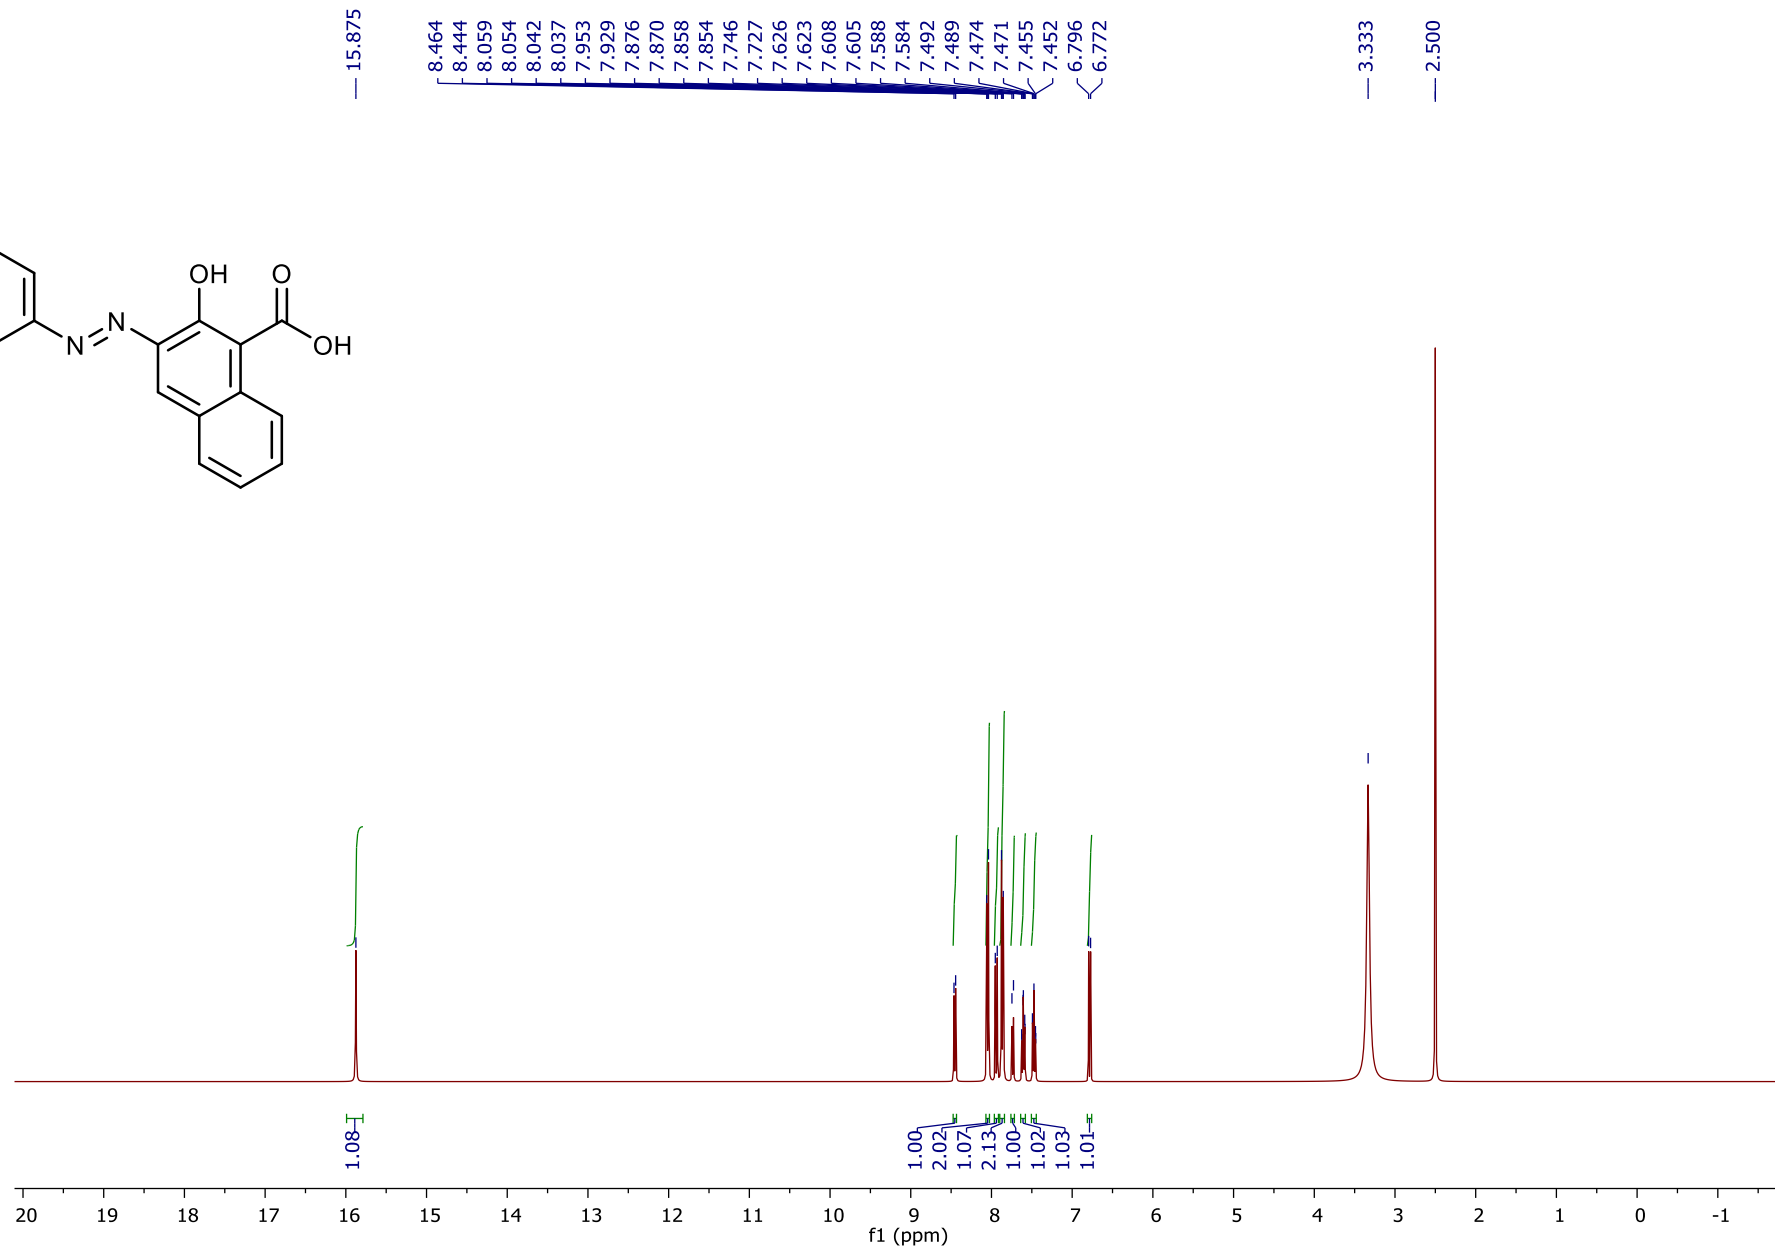

**S17:**  $^1\text{H}$  NMR of Compound **21**

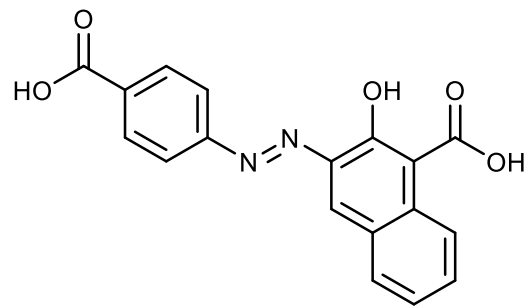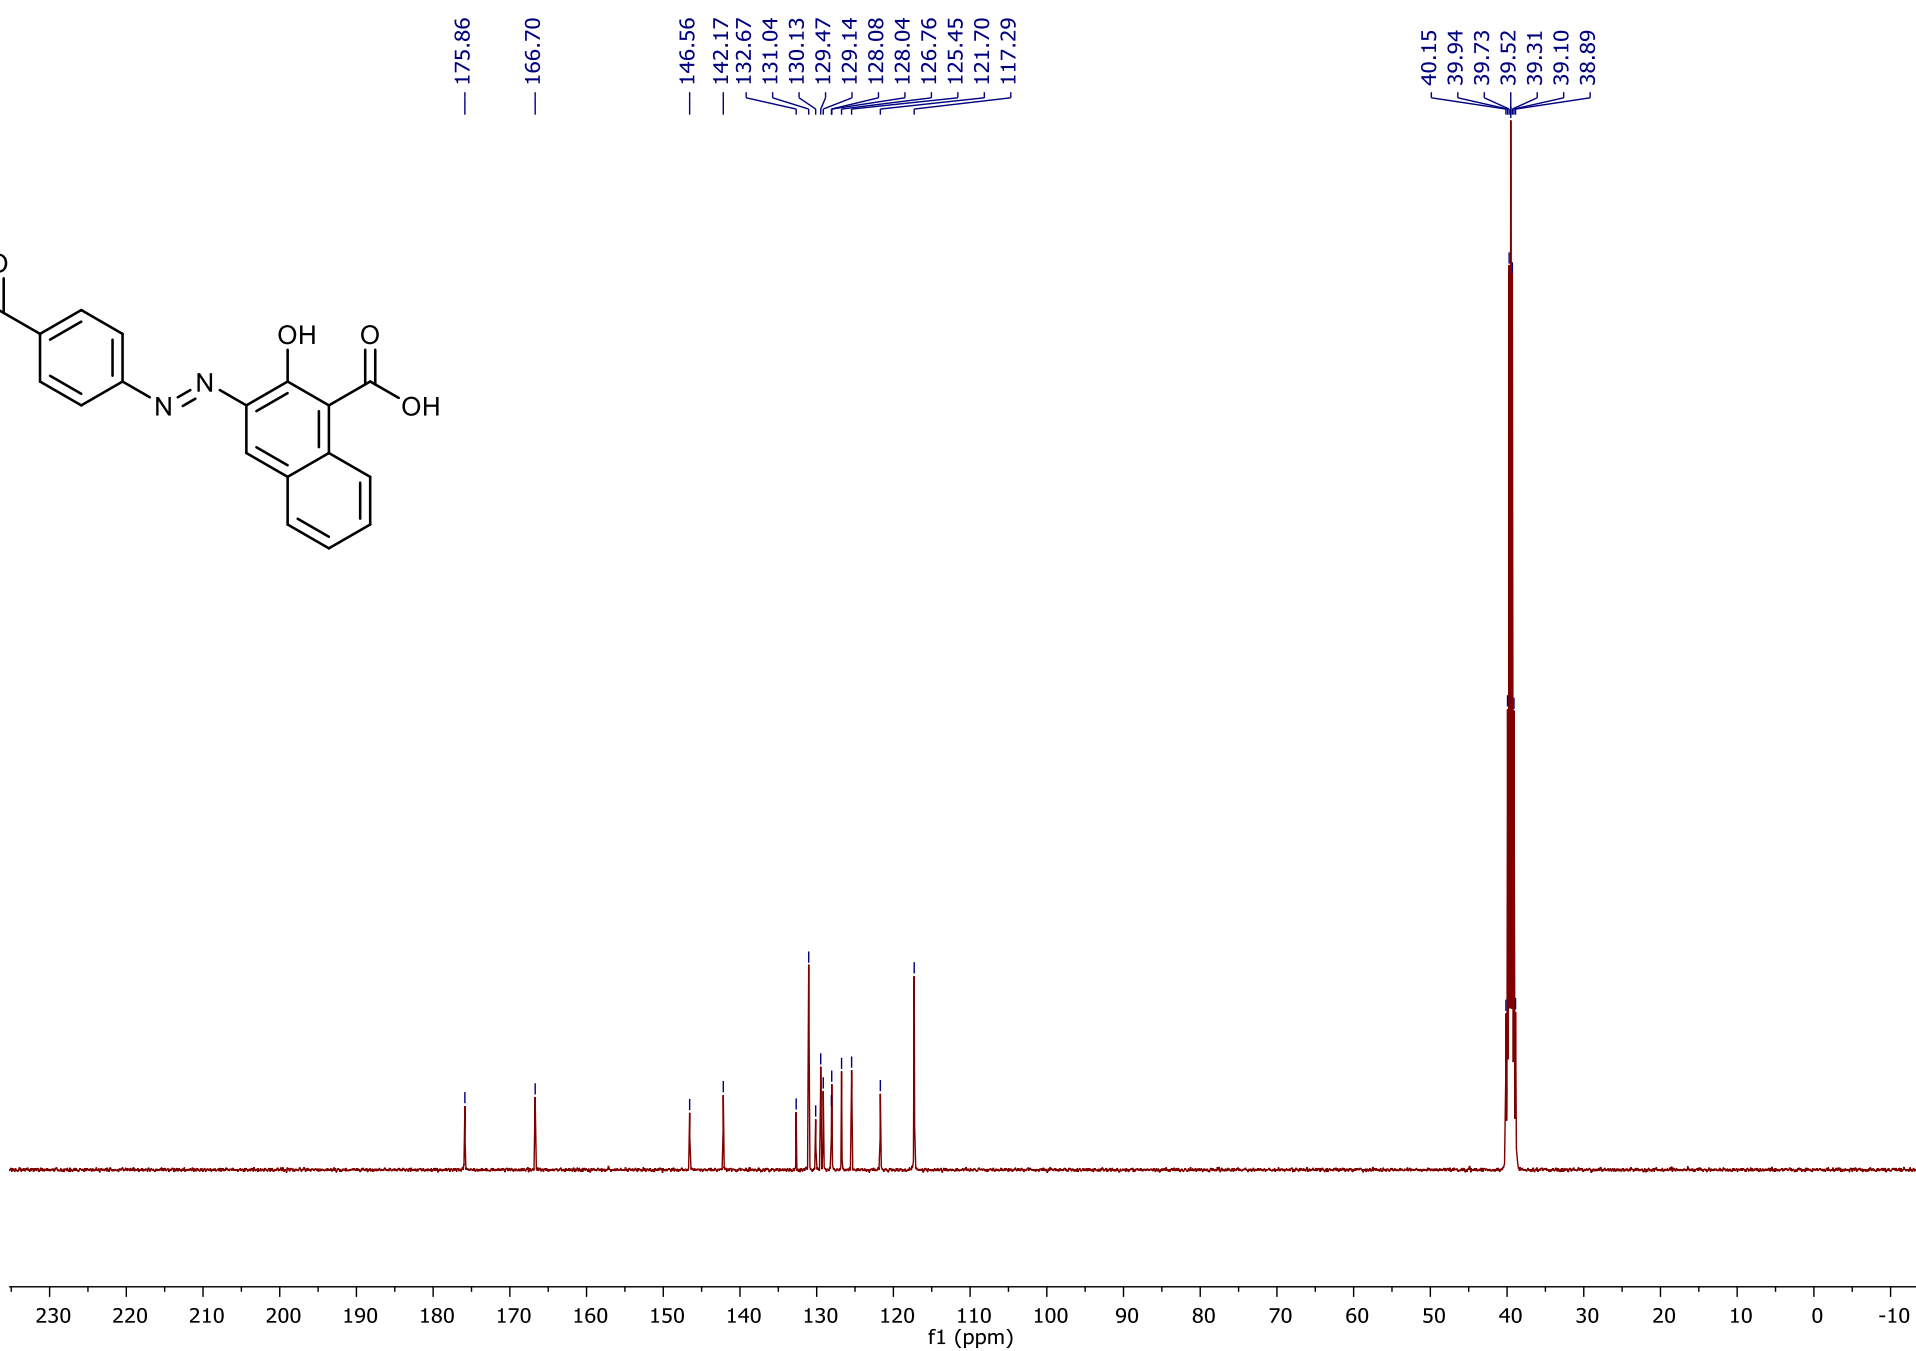

S18. <sup>13</sup>C NMR of Compound 21

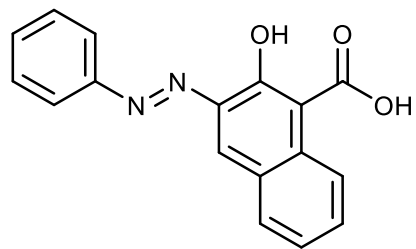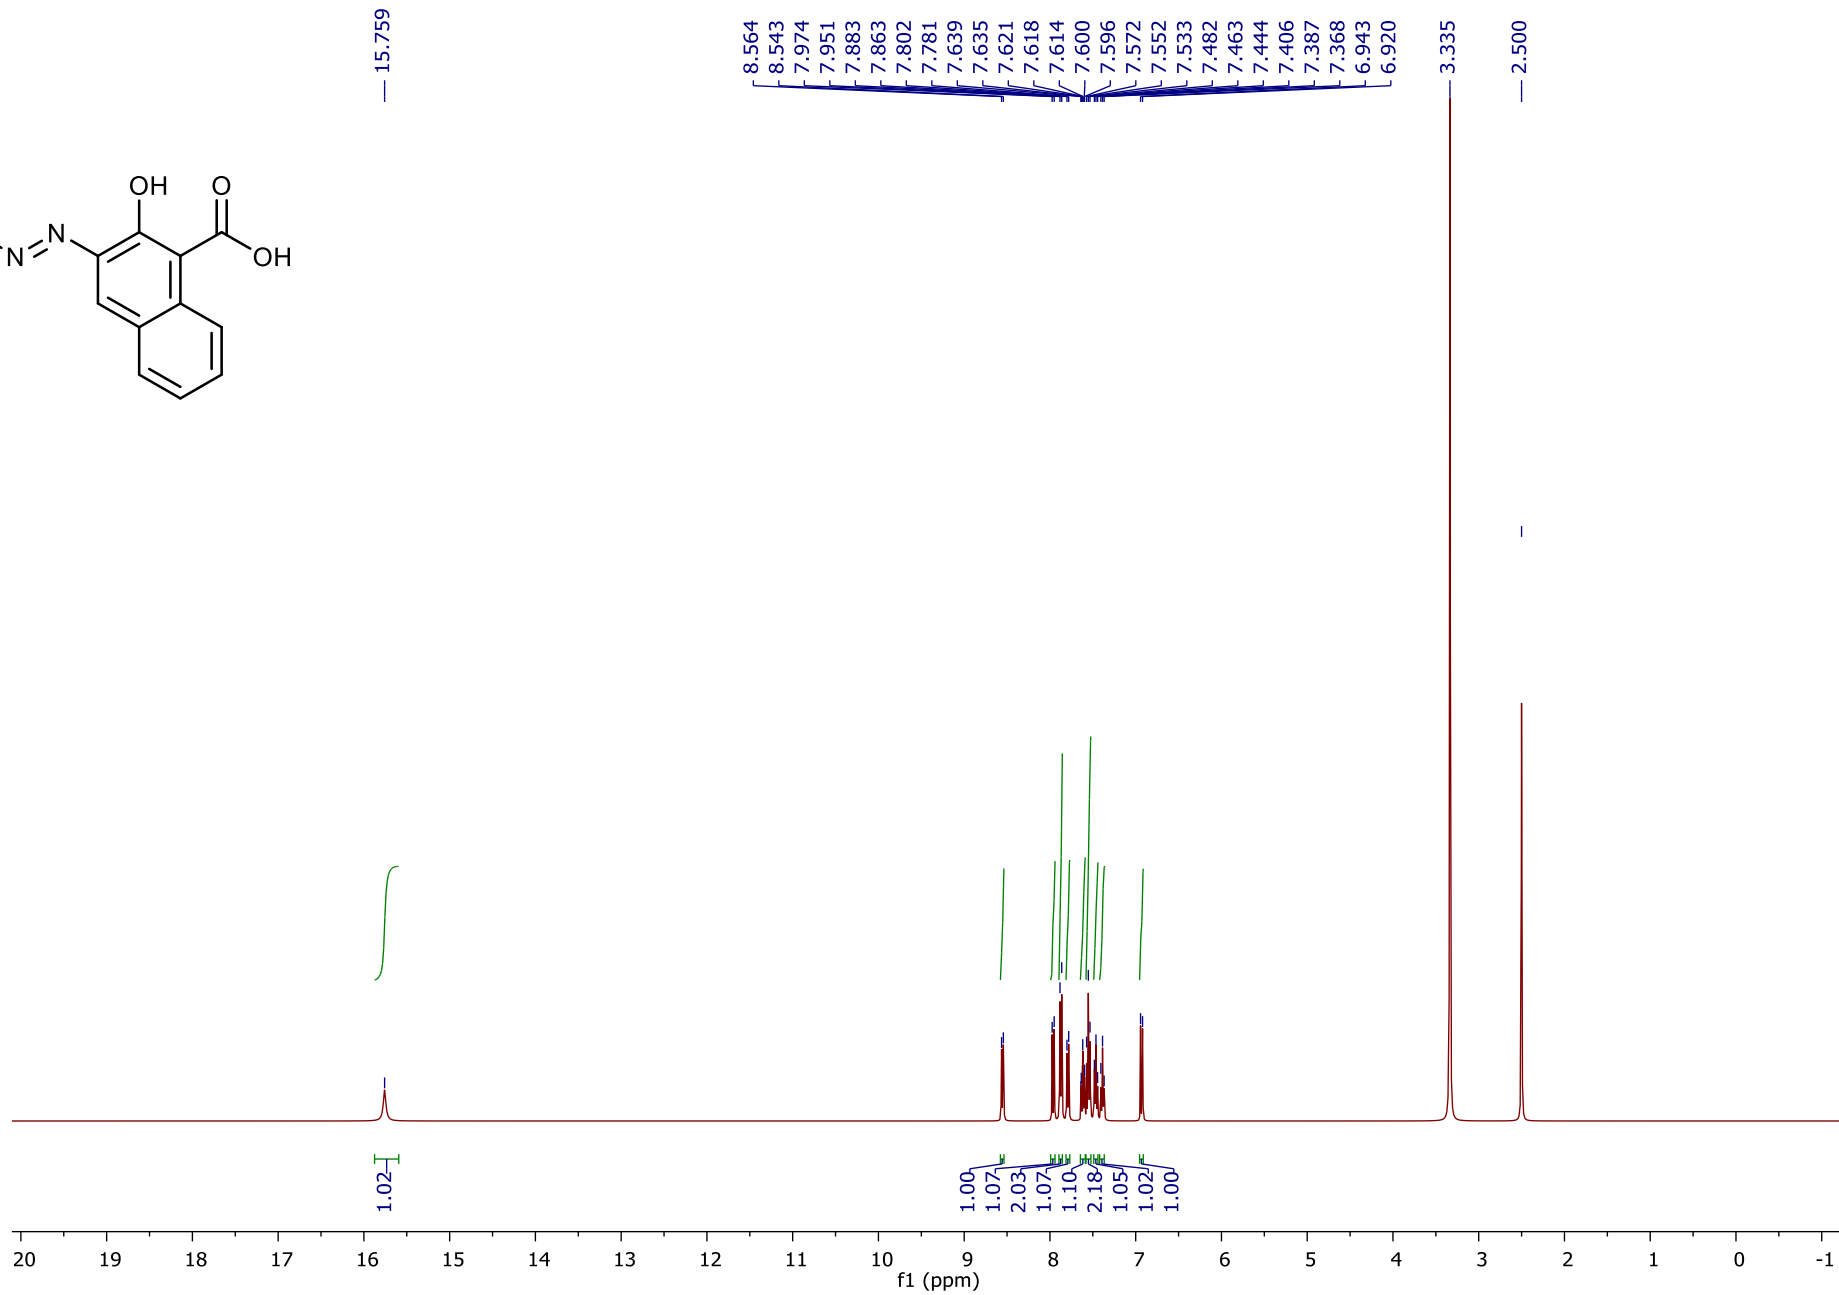

S19:  $^1\text{H}$  NMR of Compound 22

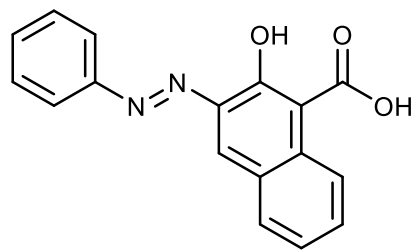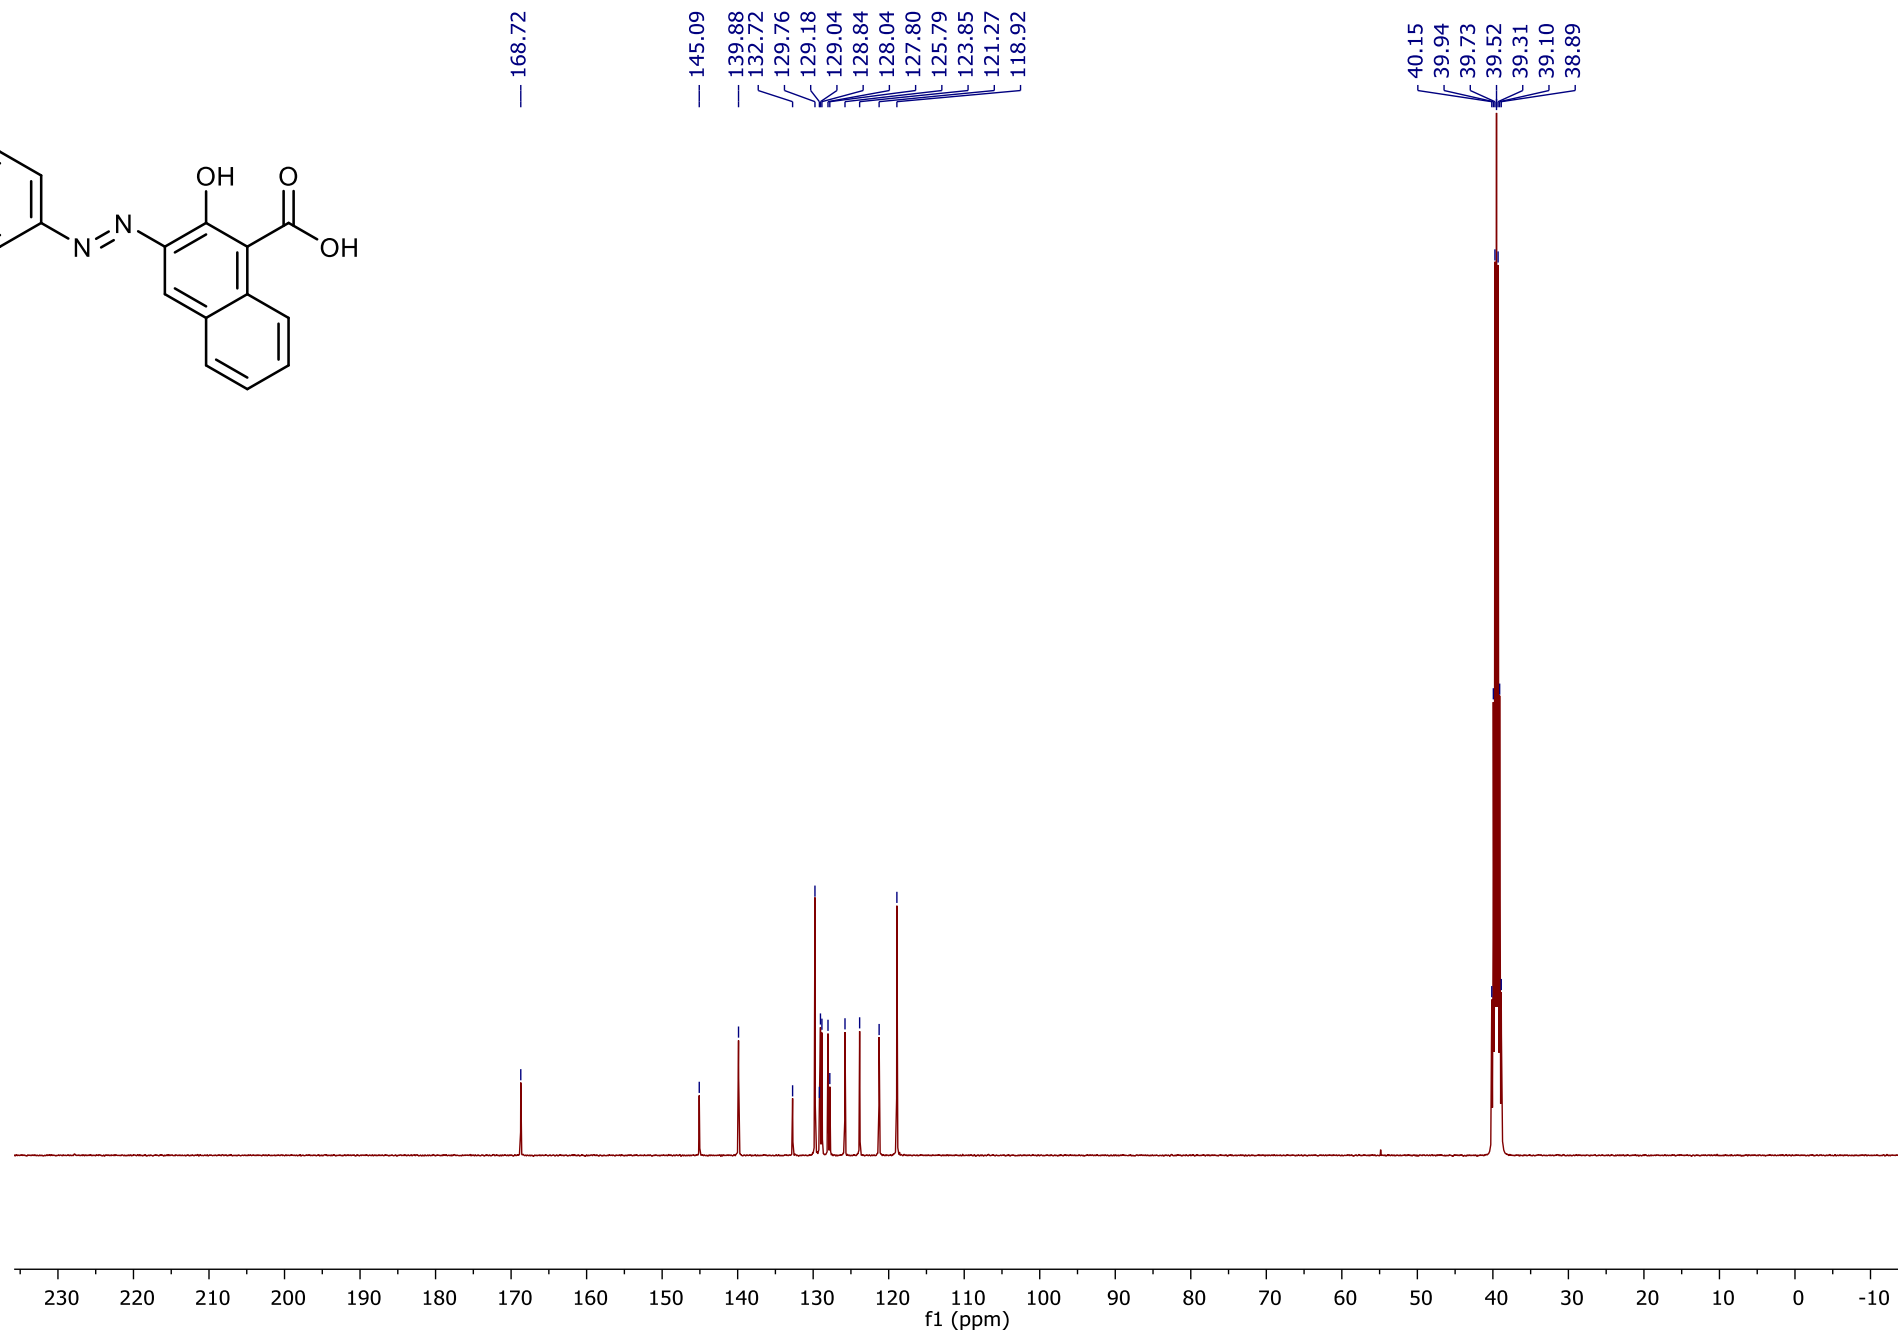

S20. <sup>13</sup>C NMR of Compound 22

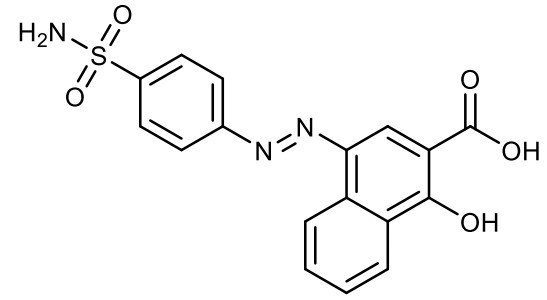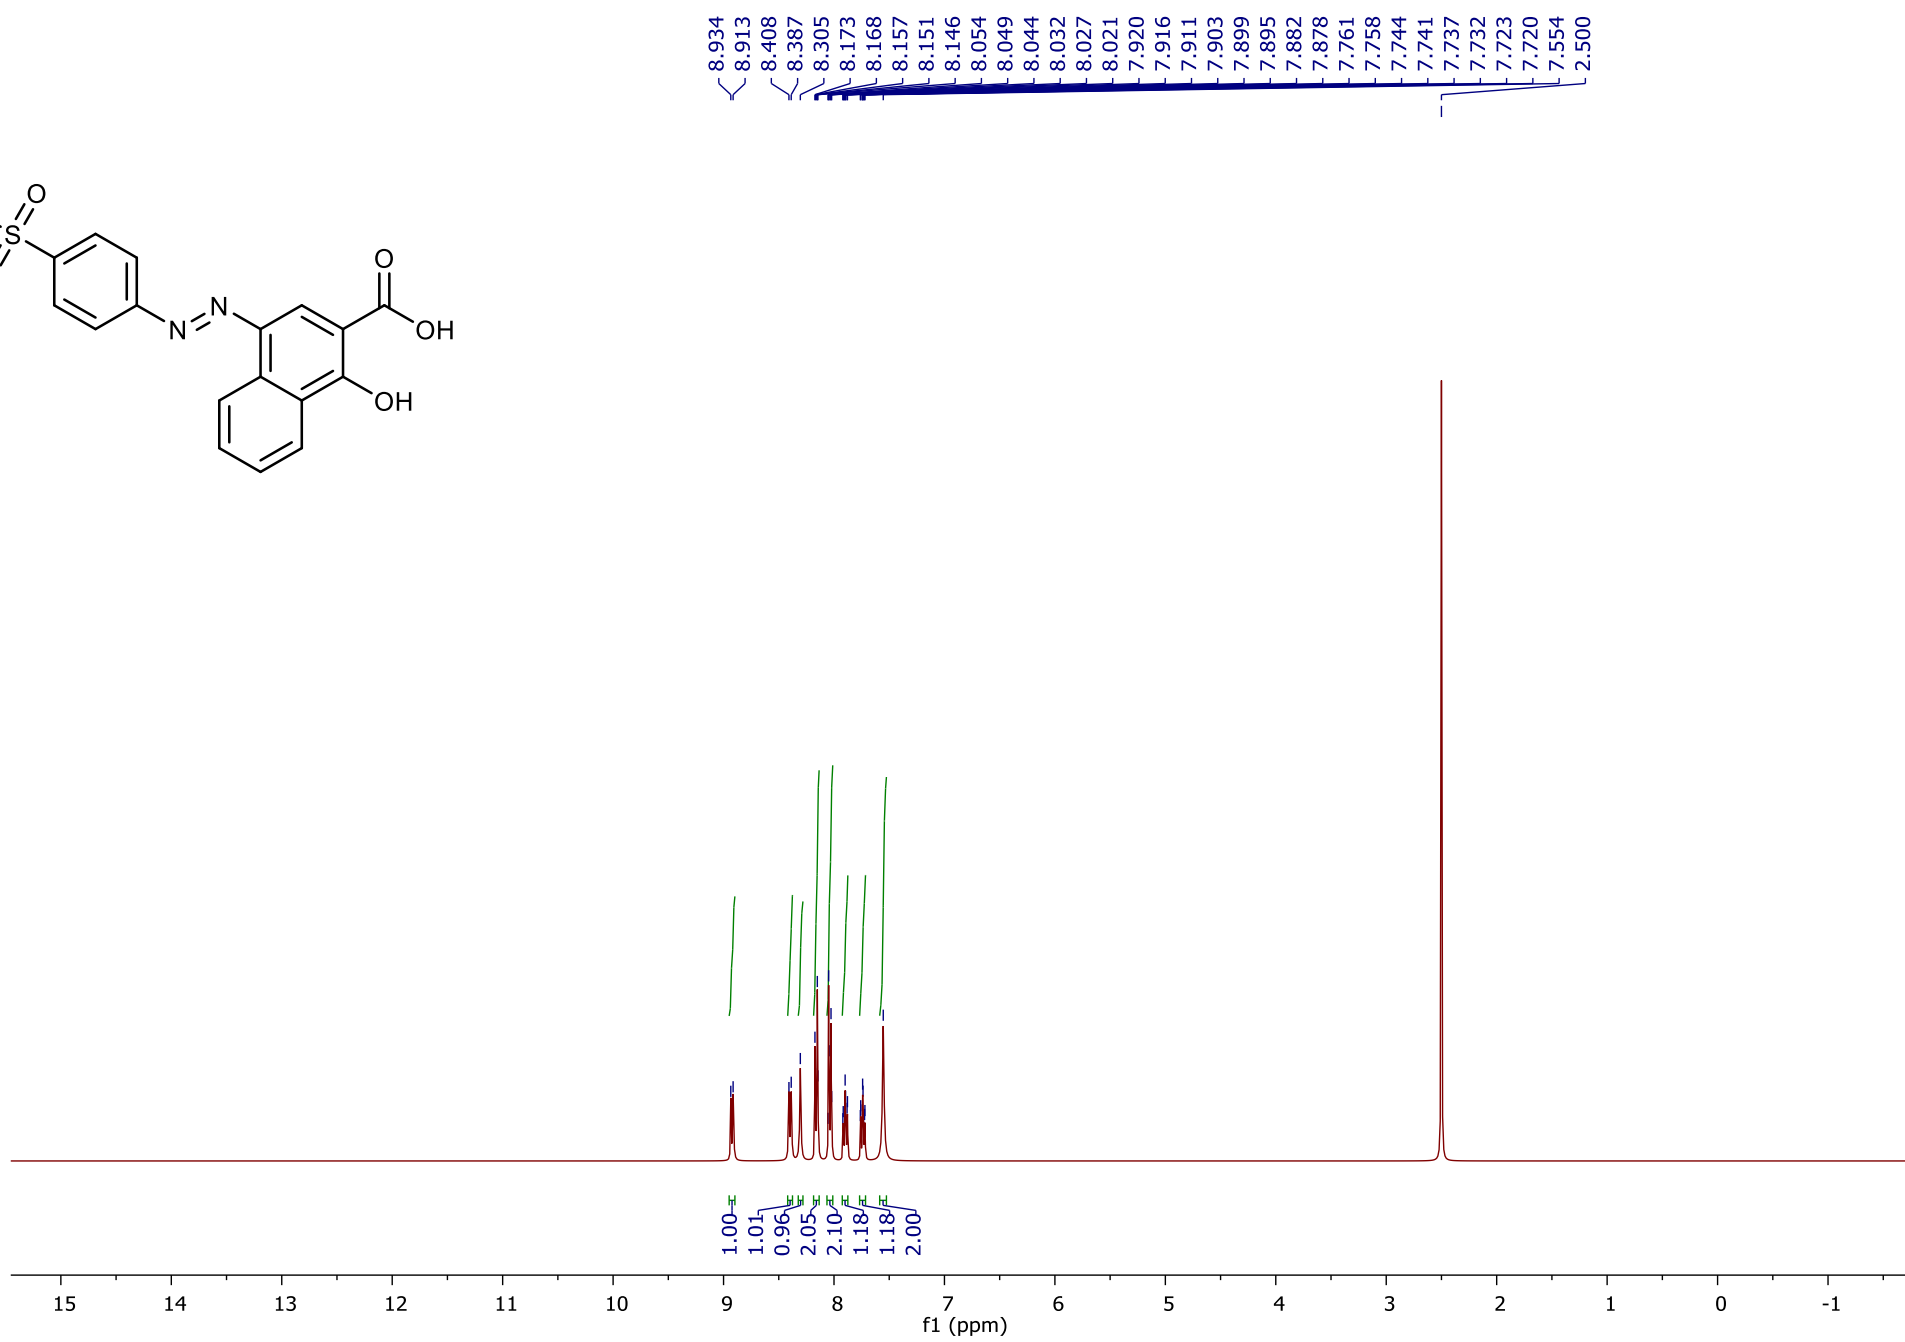

S21: <sup>1</sup>H NMR of Compound 23

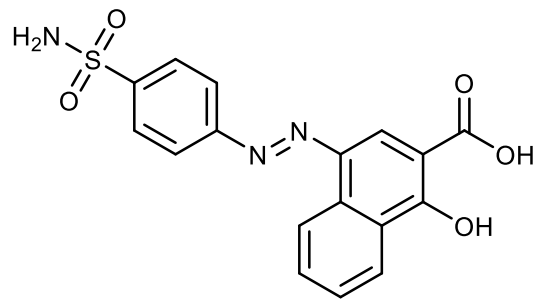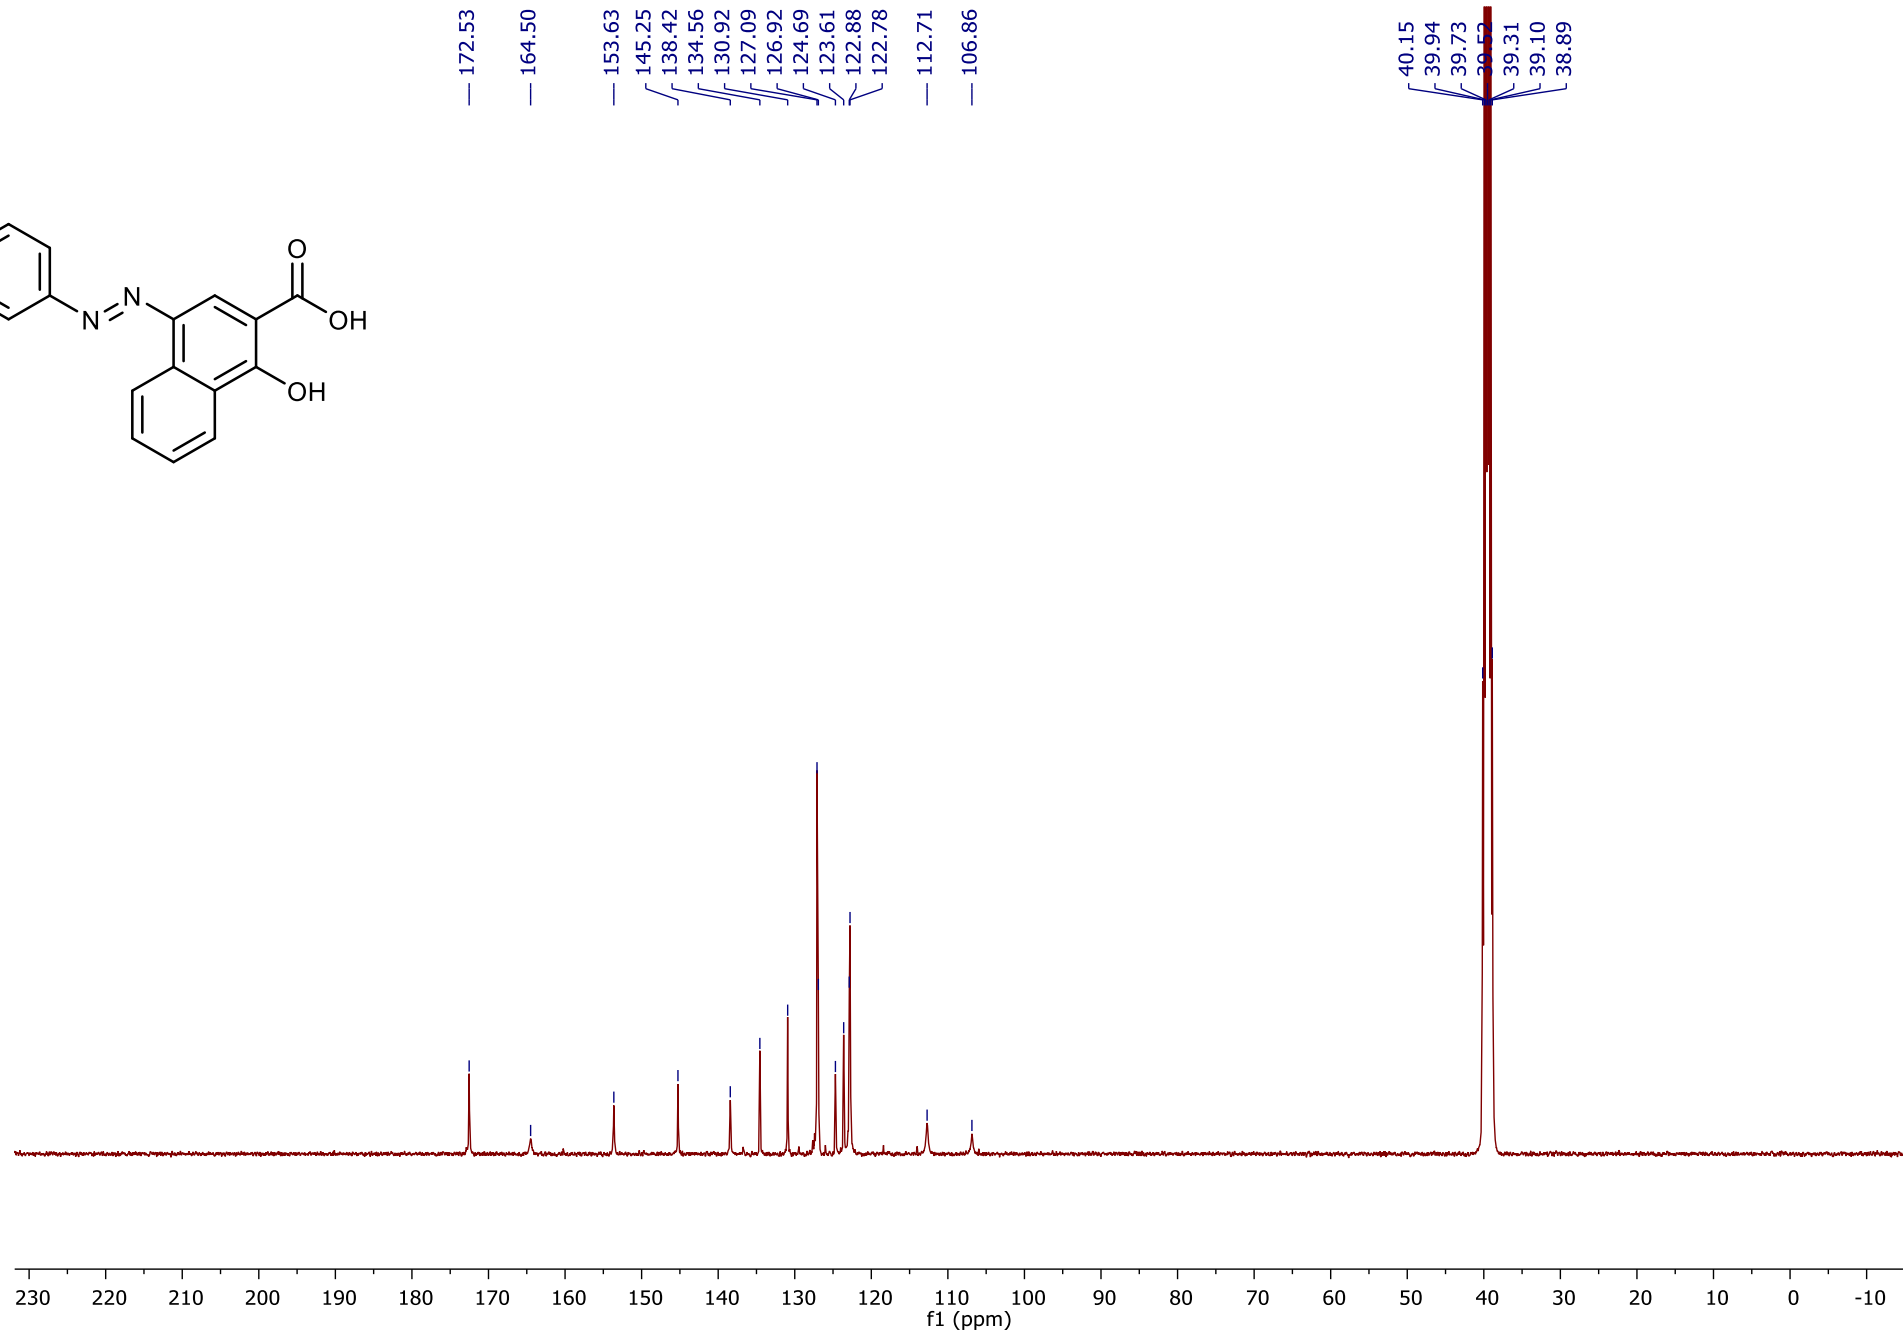

S22. <sup>13</sup>C NMR of Compound 23

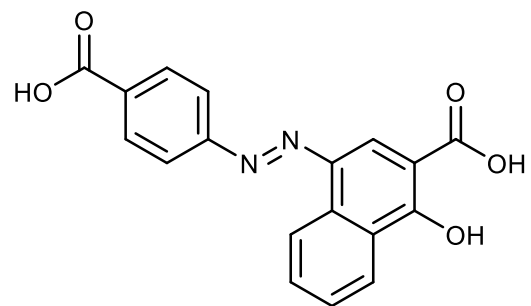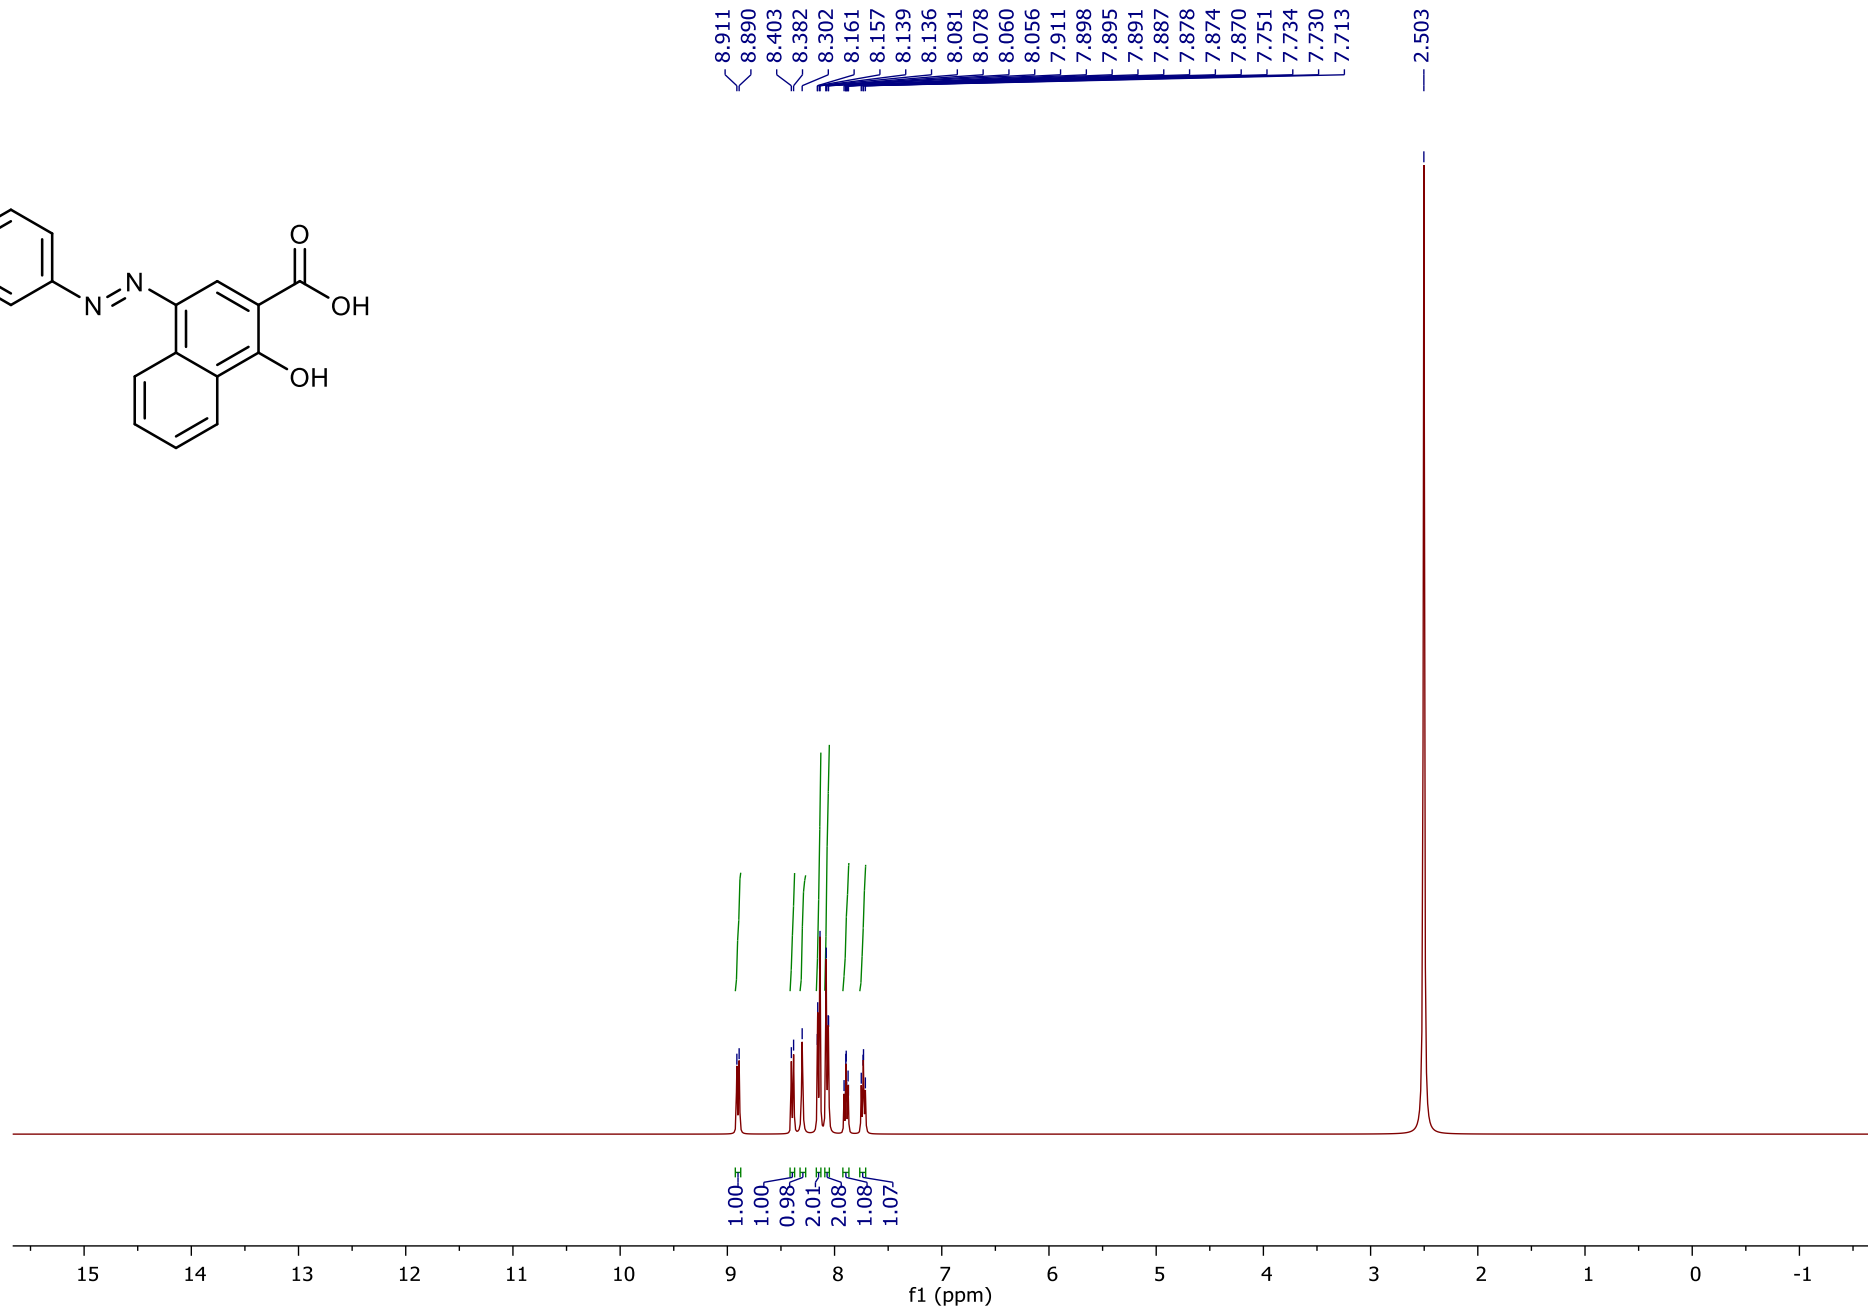

S23: <sup>1</sup>H NMR of Compound 24



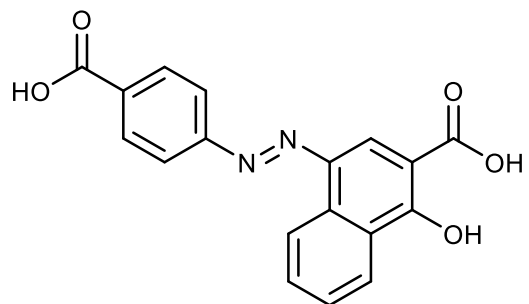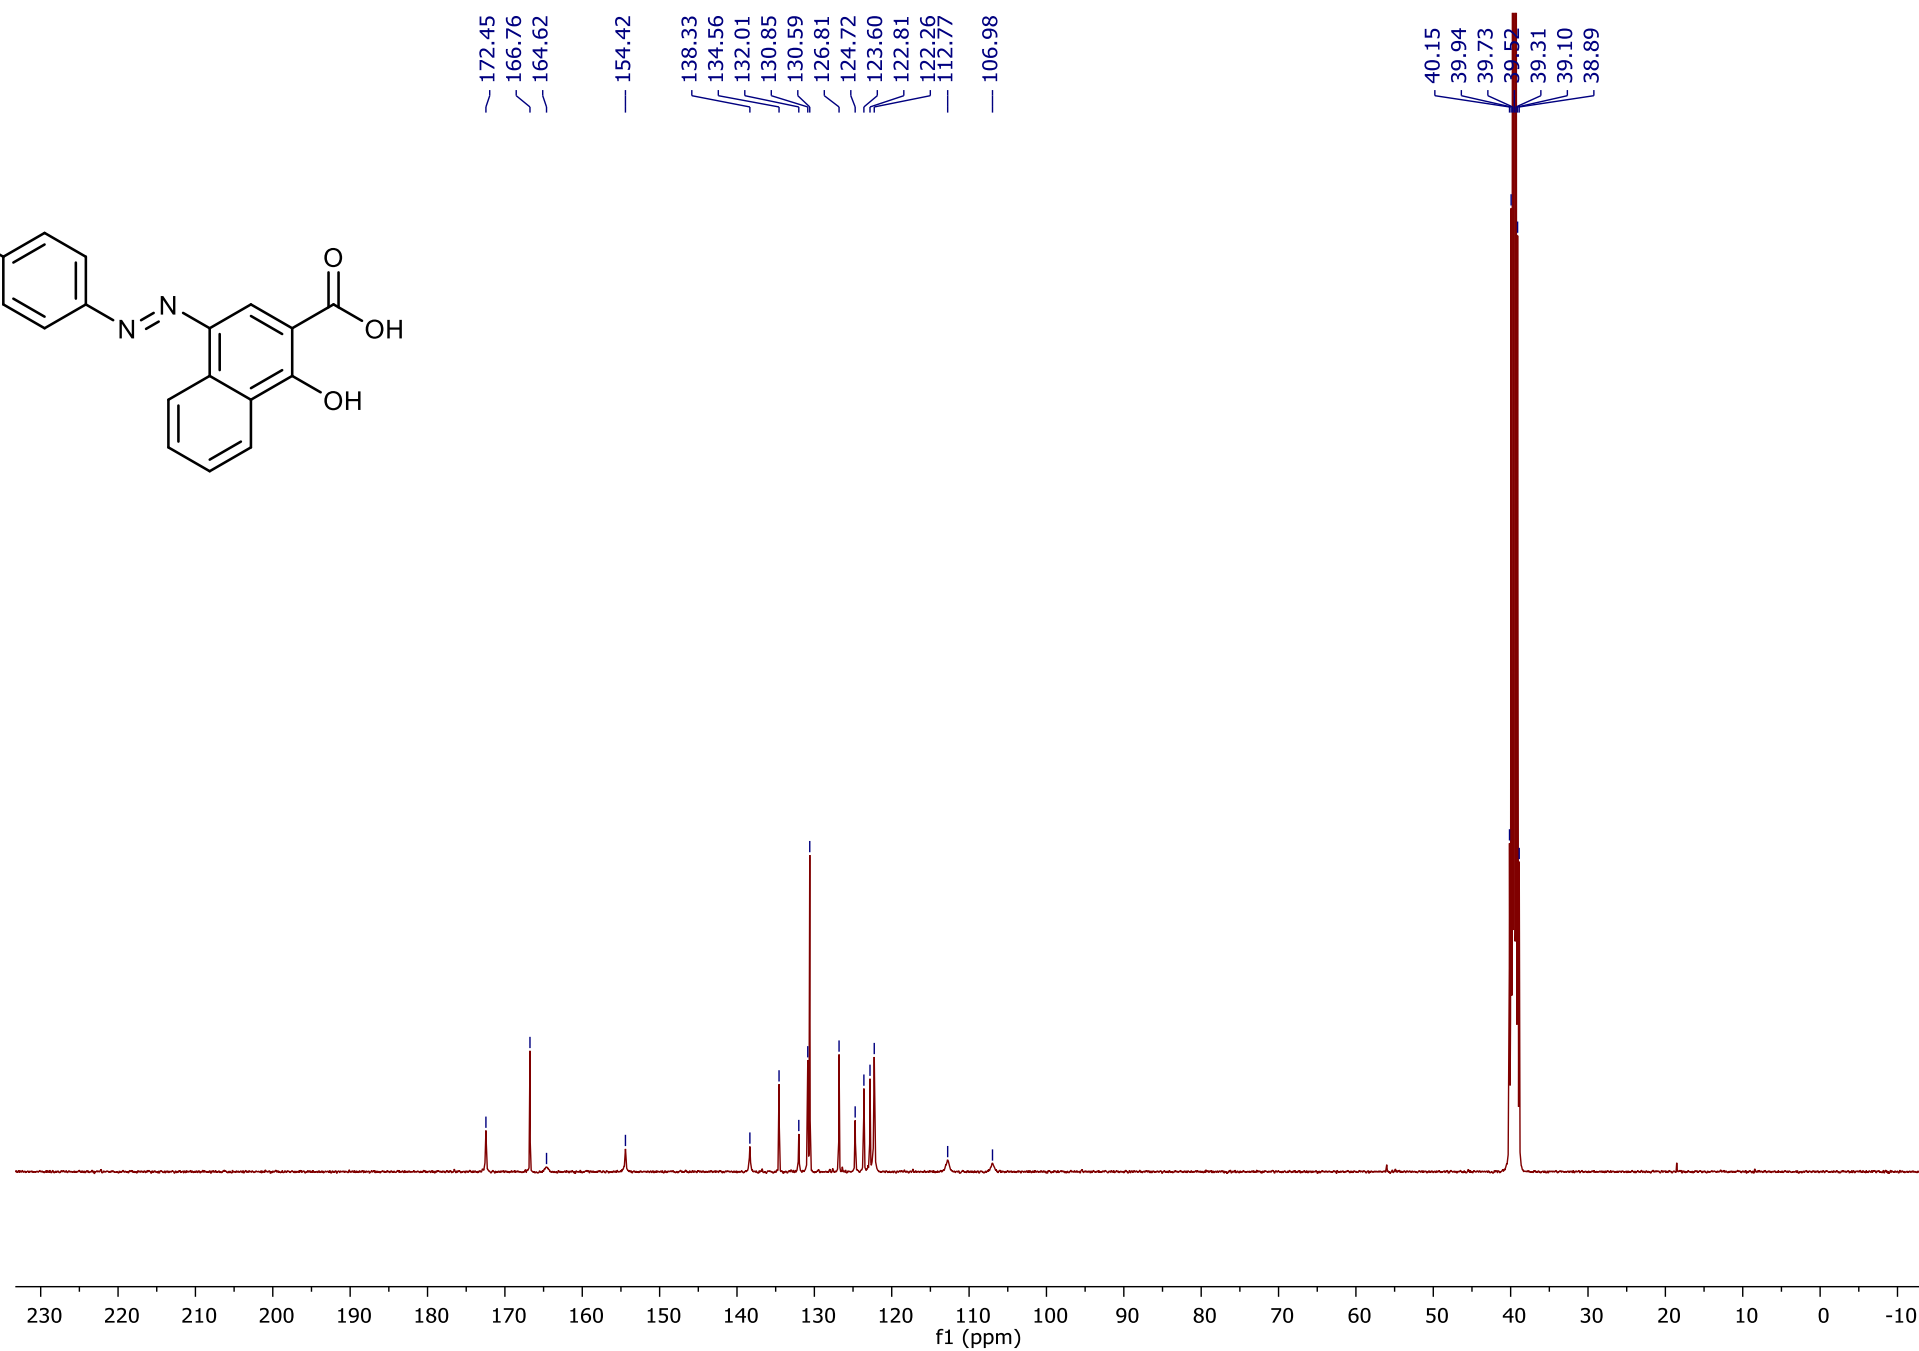

S24. <sup>13</sup>C NMR of Compound 24

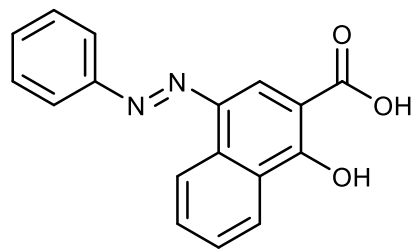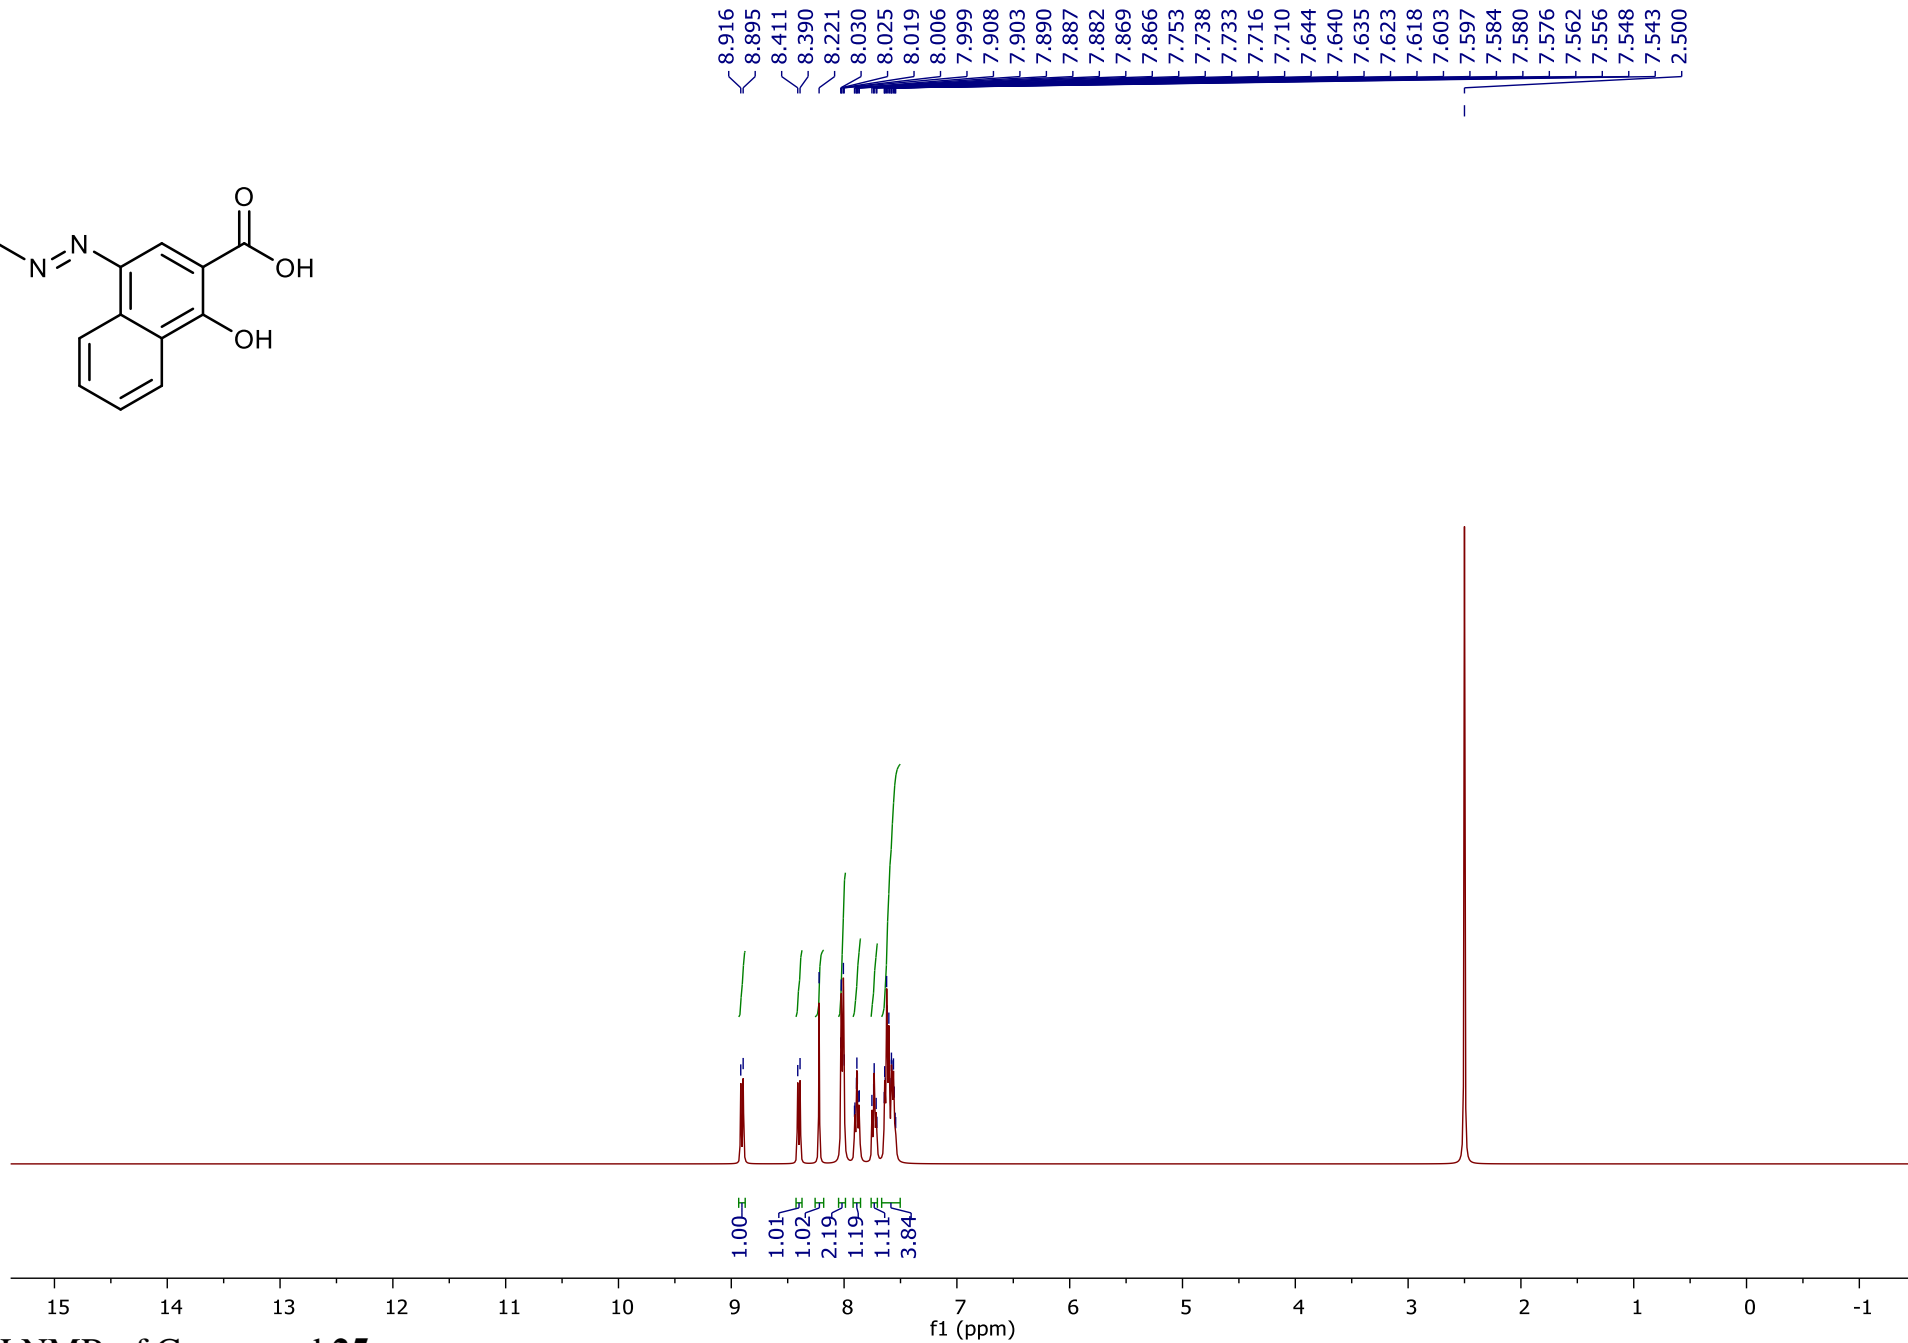

S25: <sup>1</sup>H NMR of Compound 25

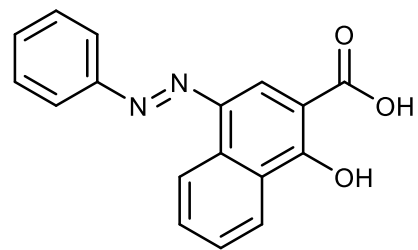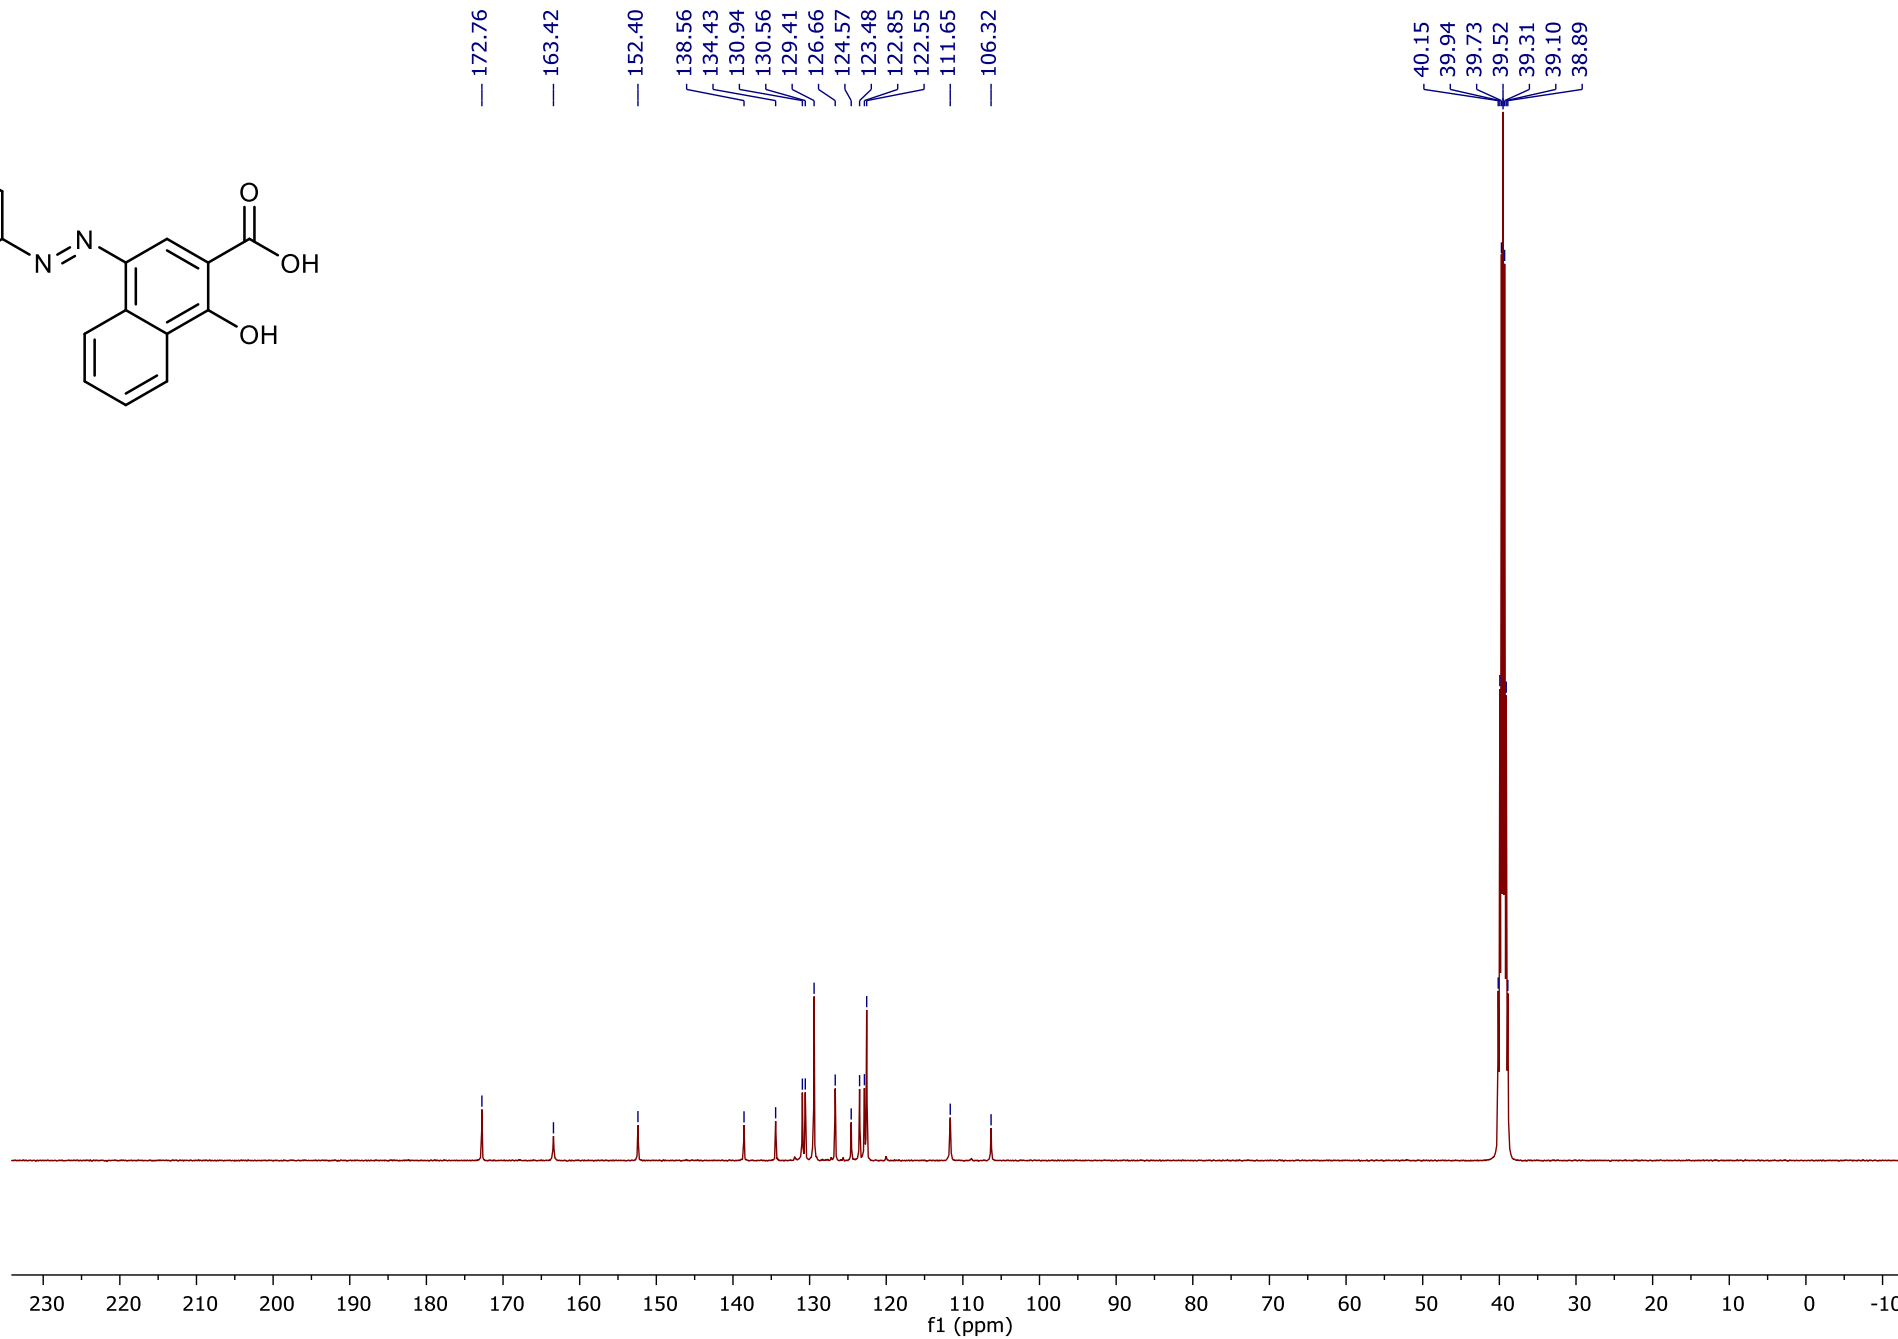

S26. <sup>13</sup>C NMR of Compound 25

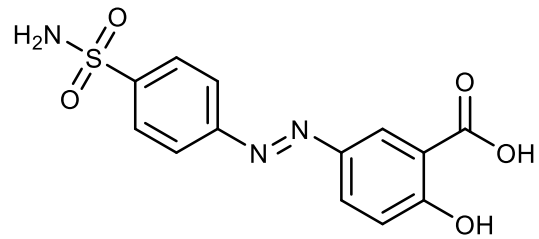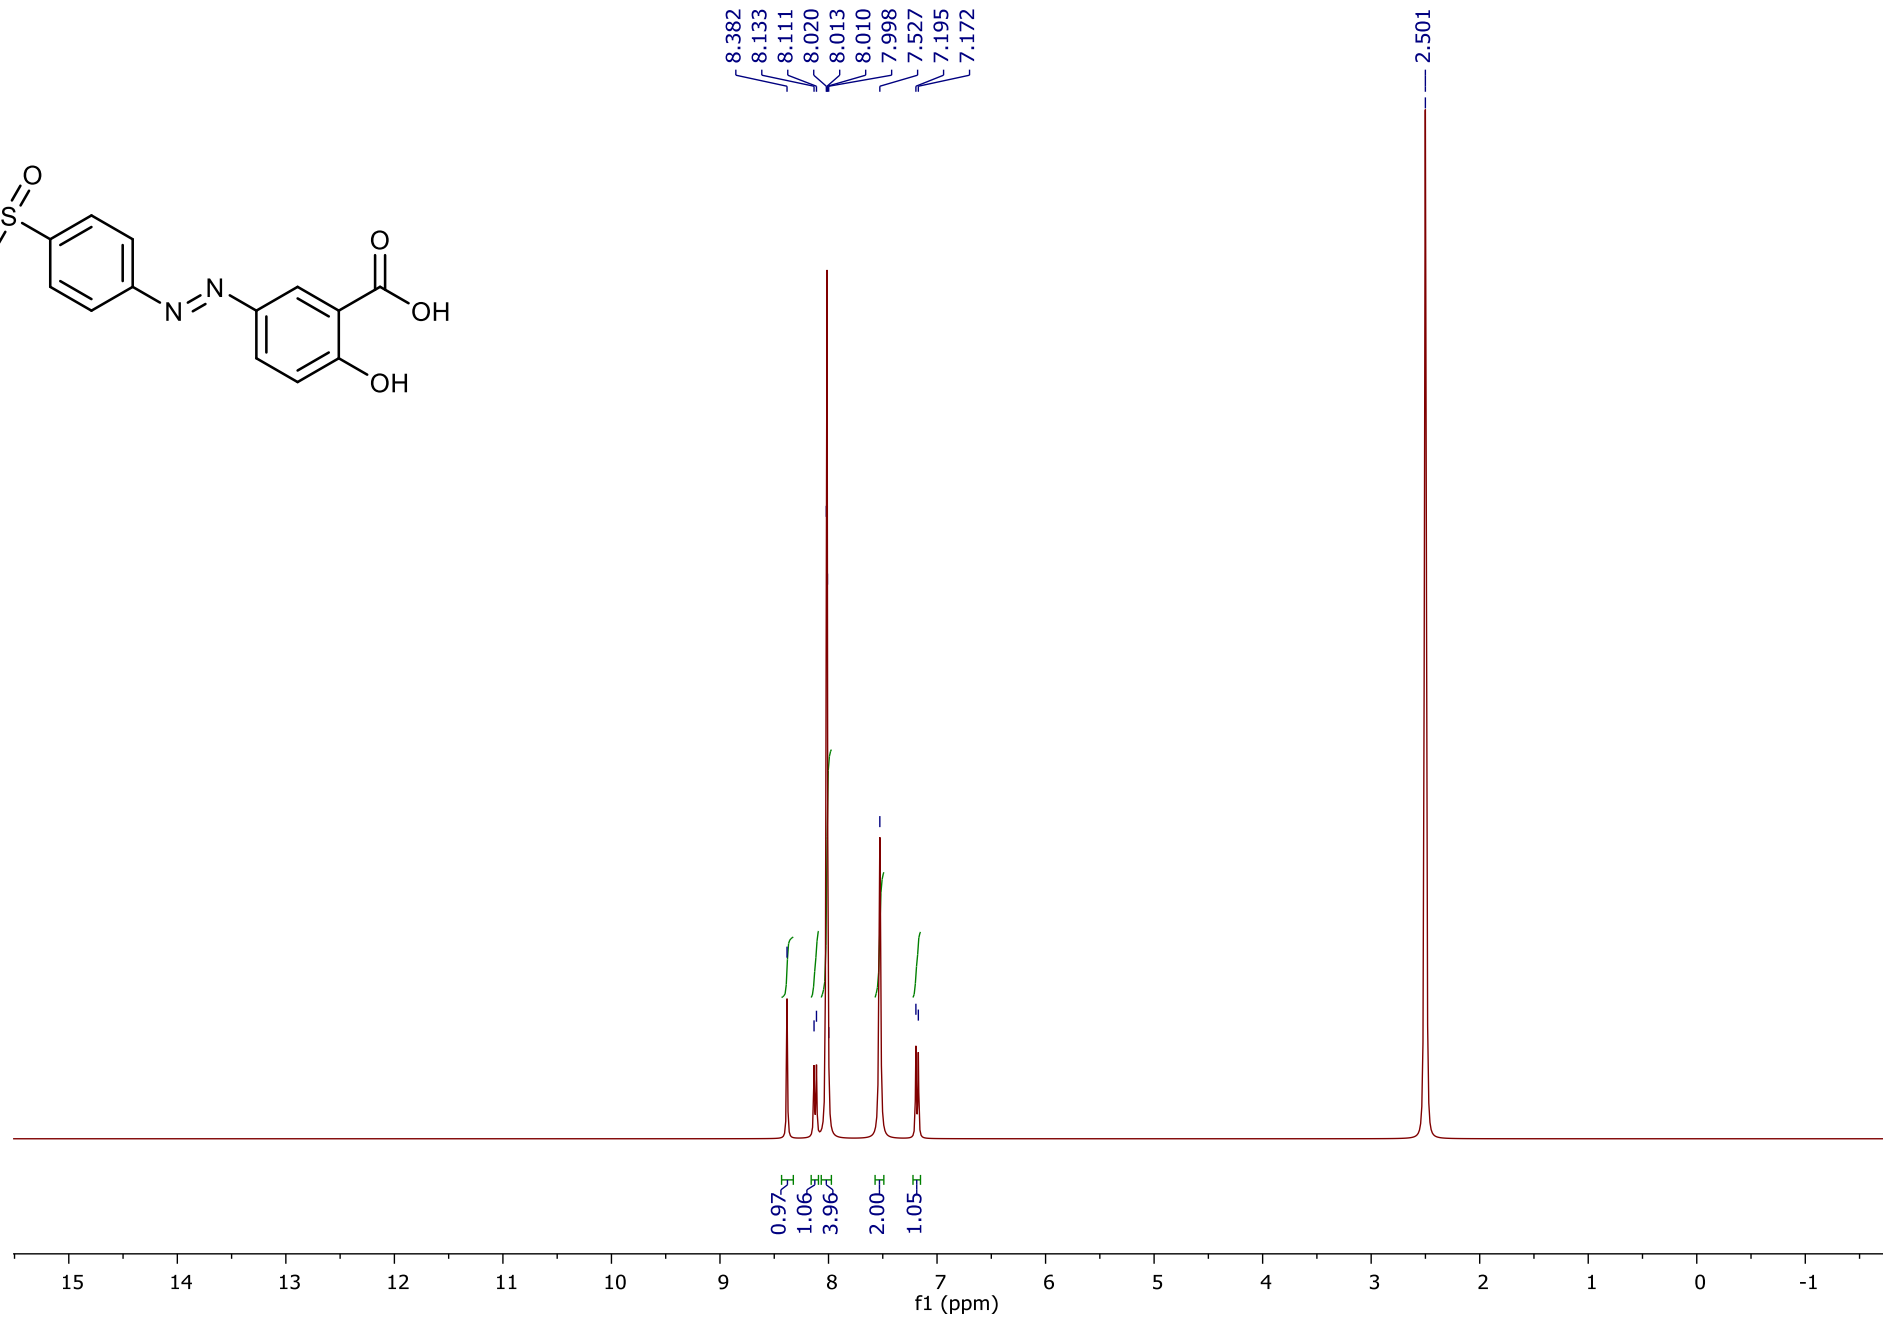

**S27:** <sup>1</sup>H NMR of Compound **26**

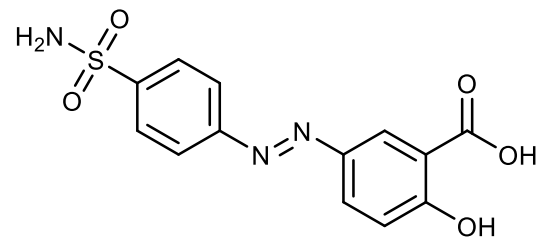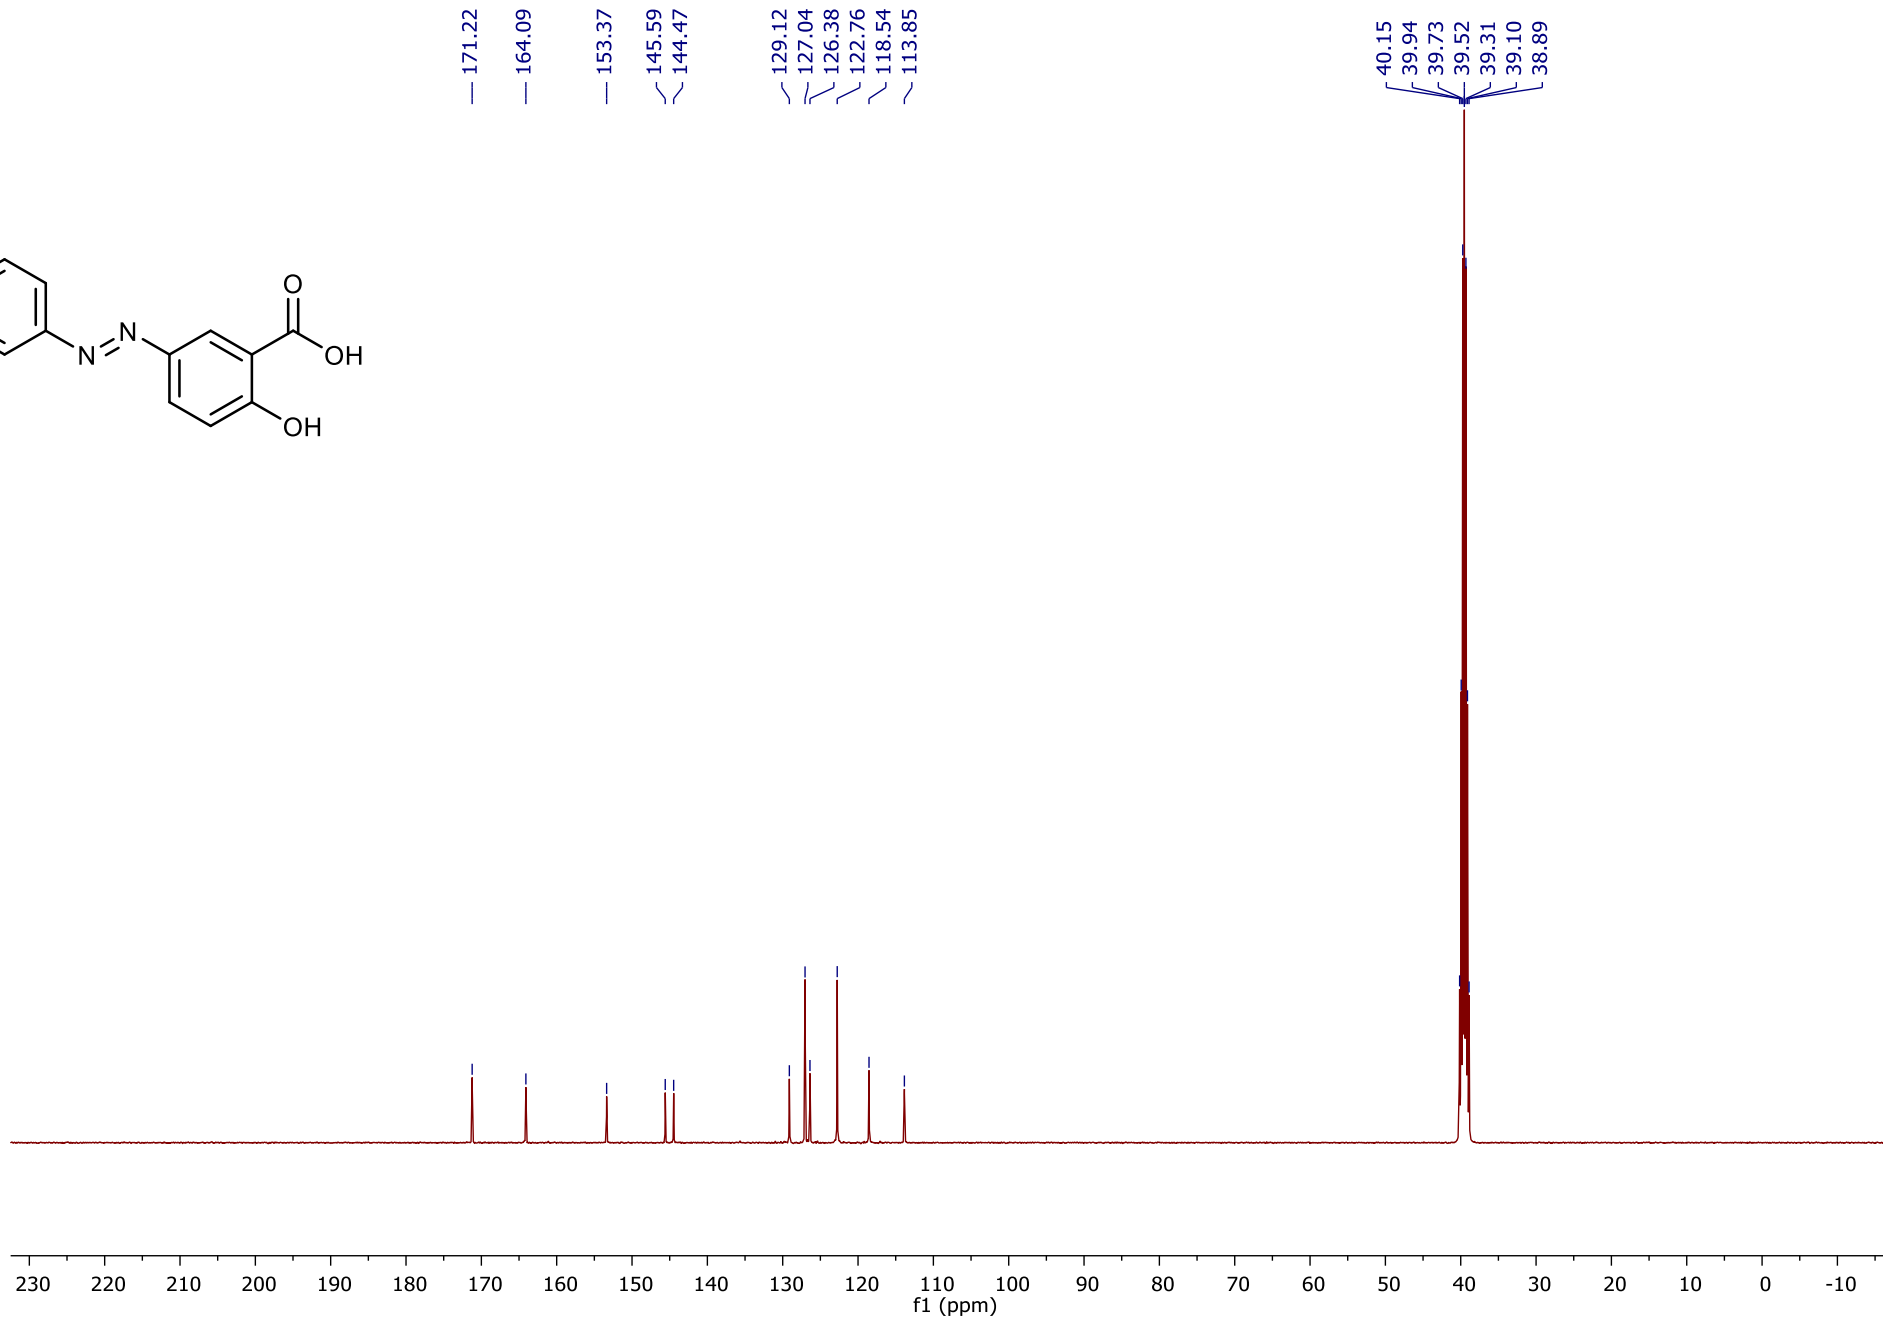

S28. <sup>13</sup>C NMR of Compound 26

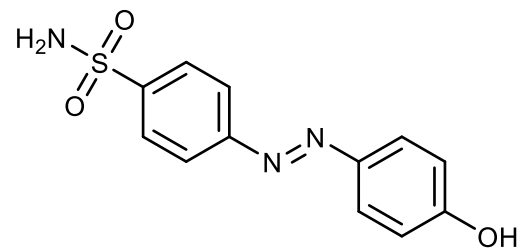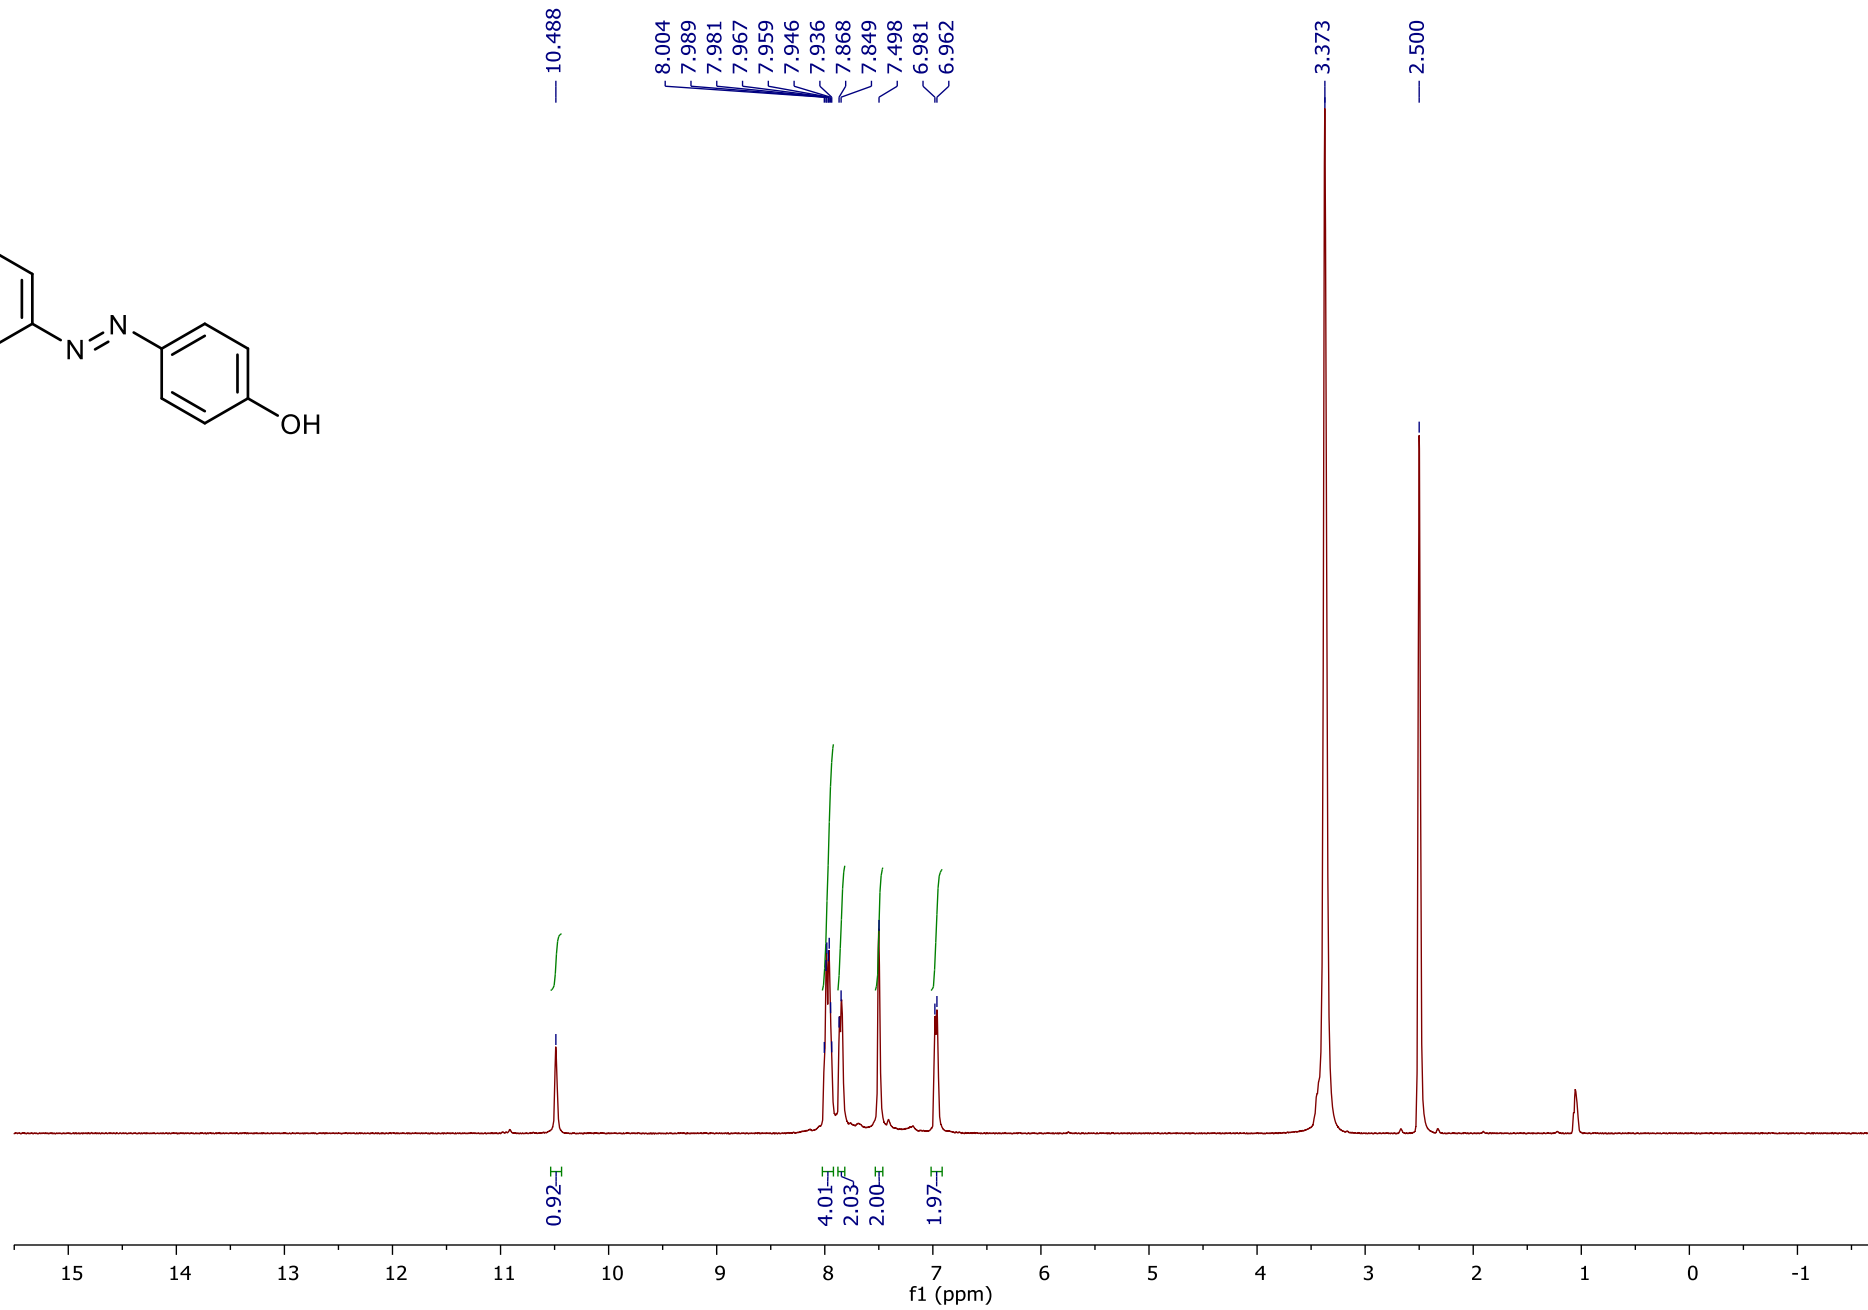

**S29:** <sup>1</sup>H NMR of Compound **27**

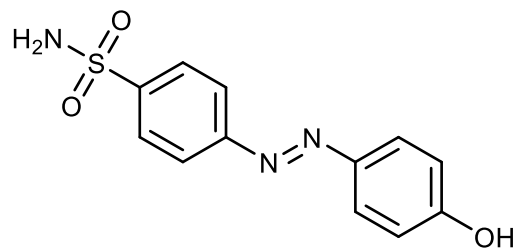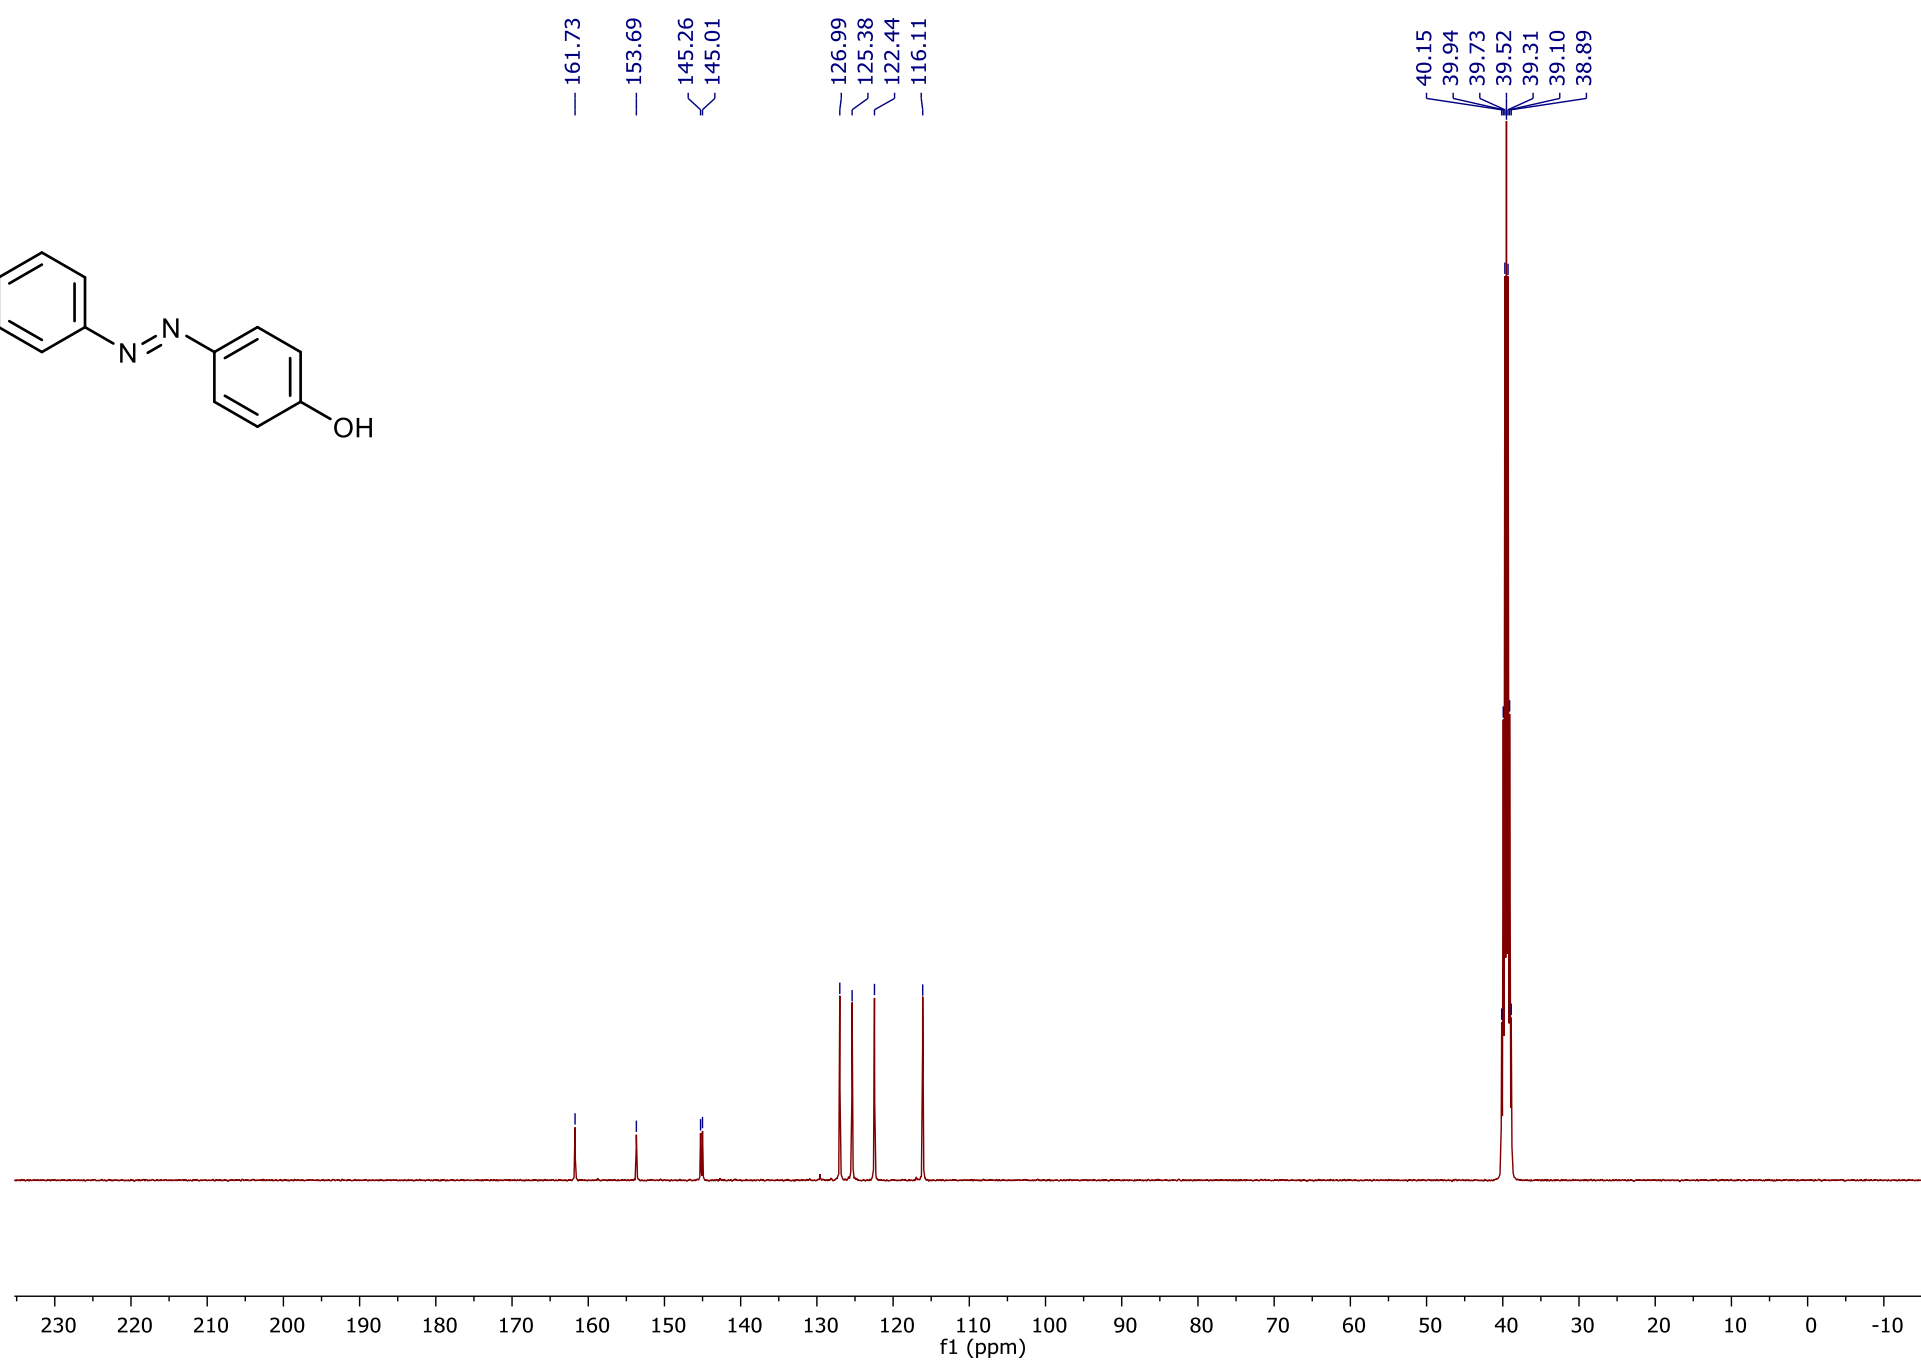

S30. <sup>13</sup>C NMR of Compound 27

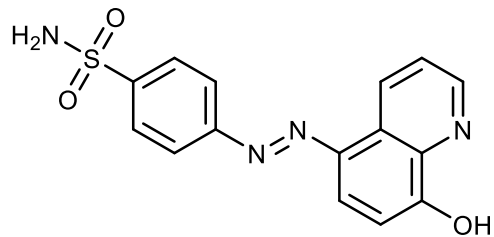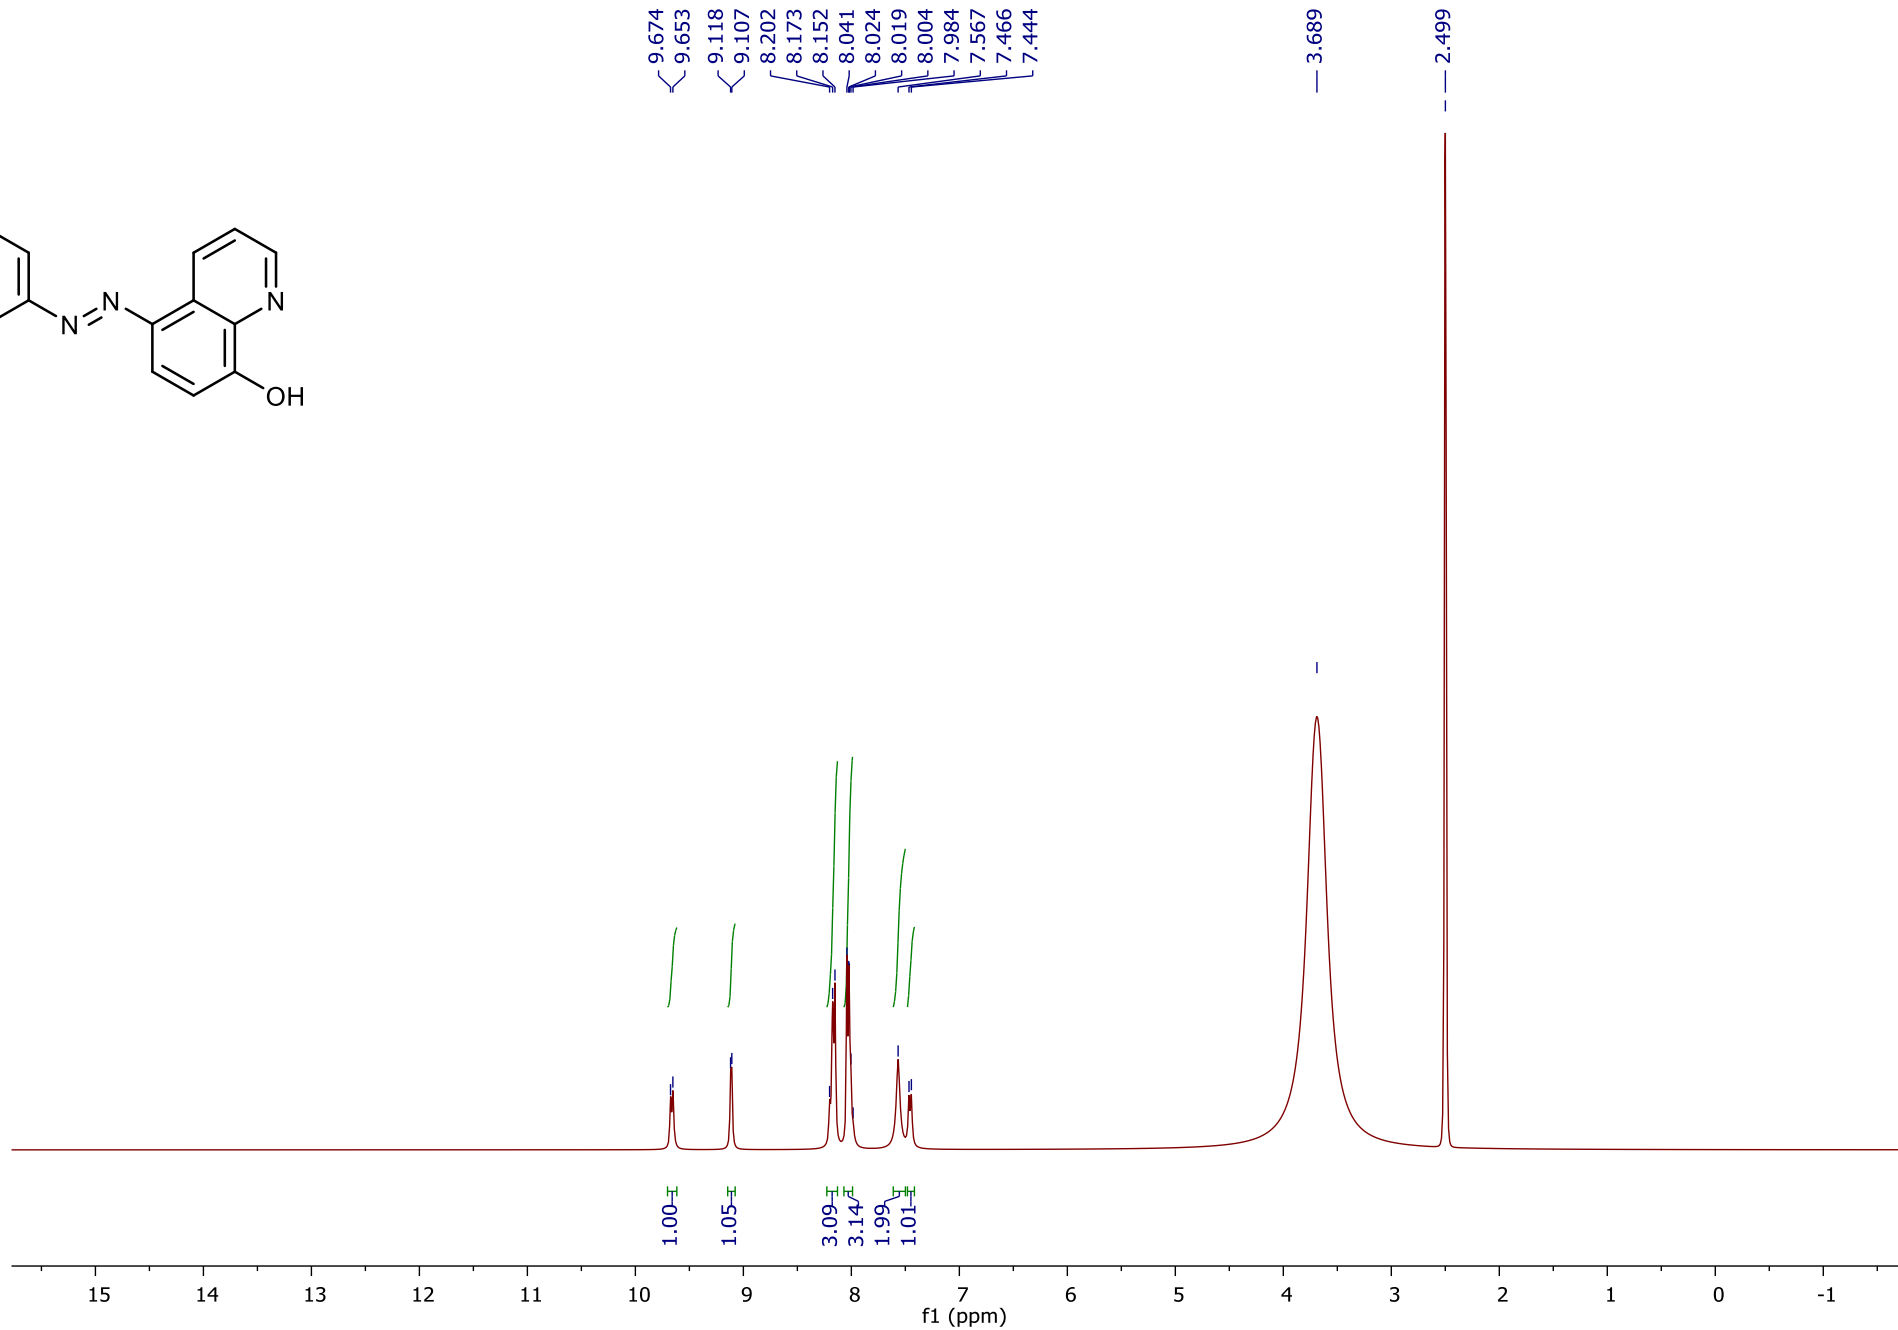

S31:  $^1\text{H}$  NMR of Compound **28**



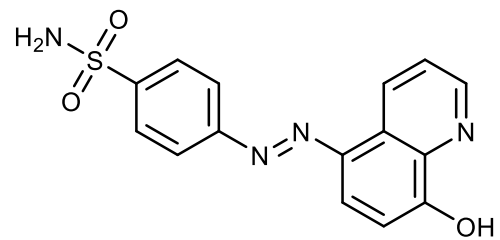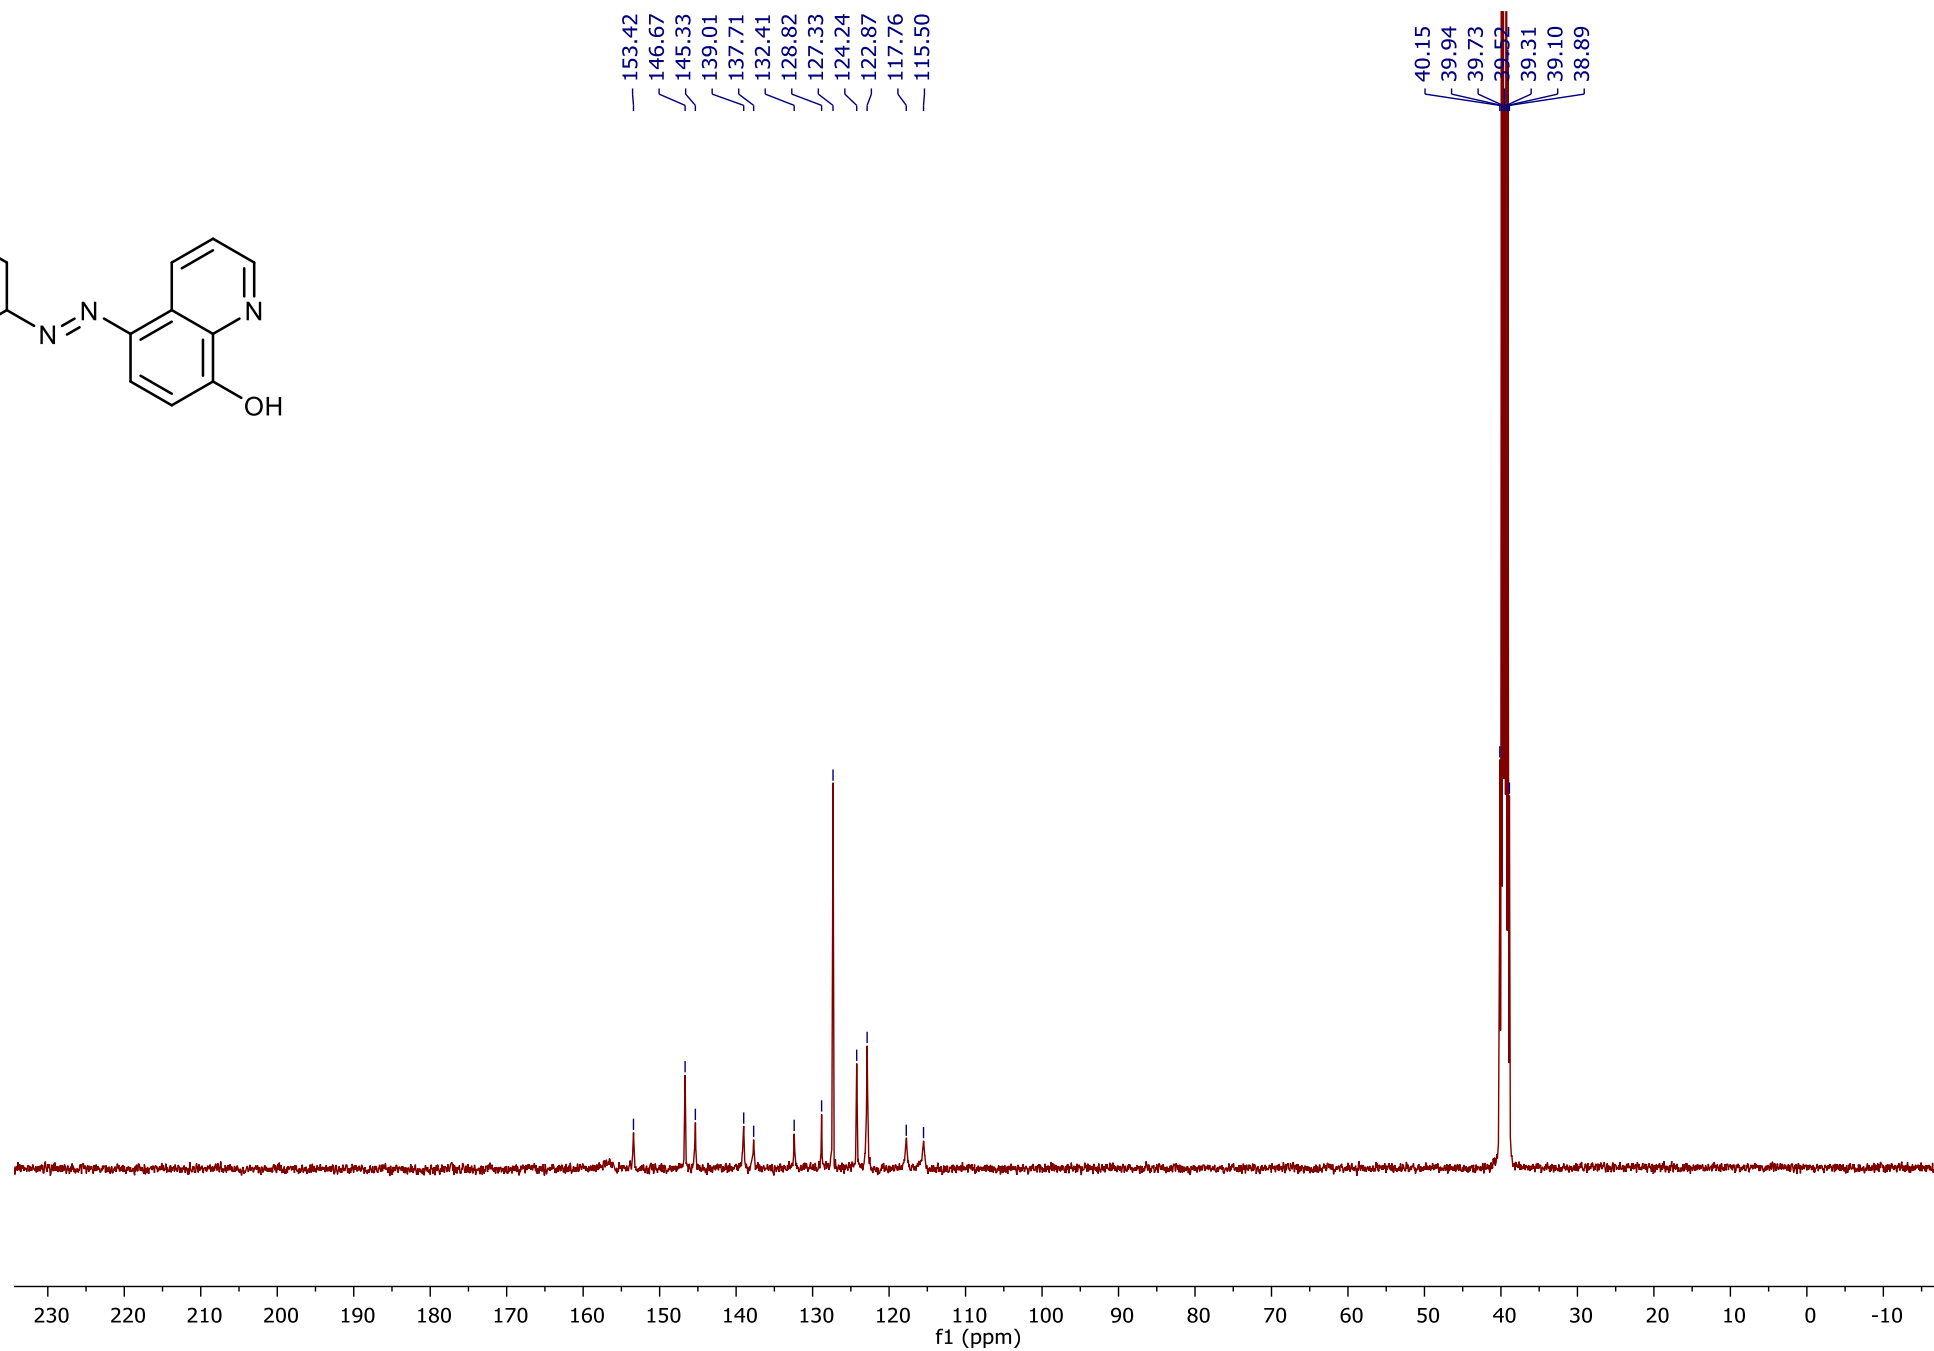

S32. <sup>13</sup>C NMR of Compound 28

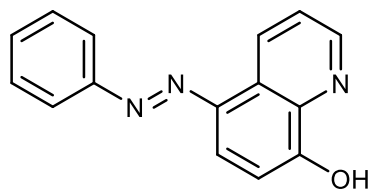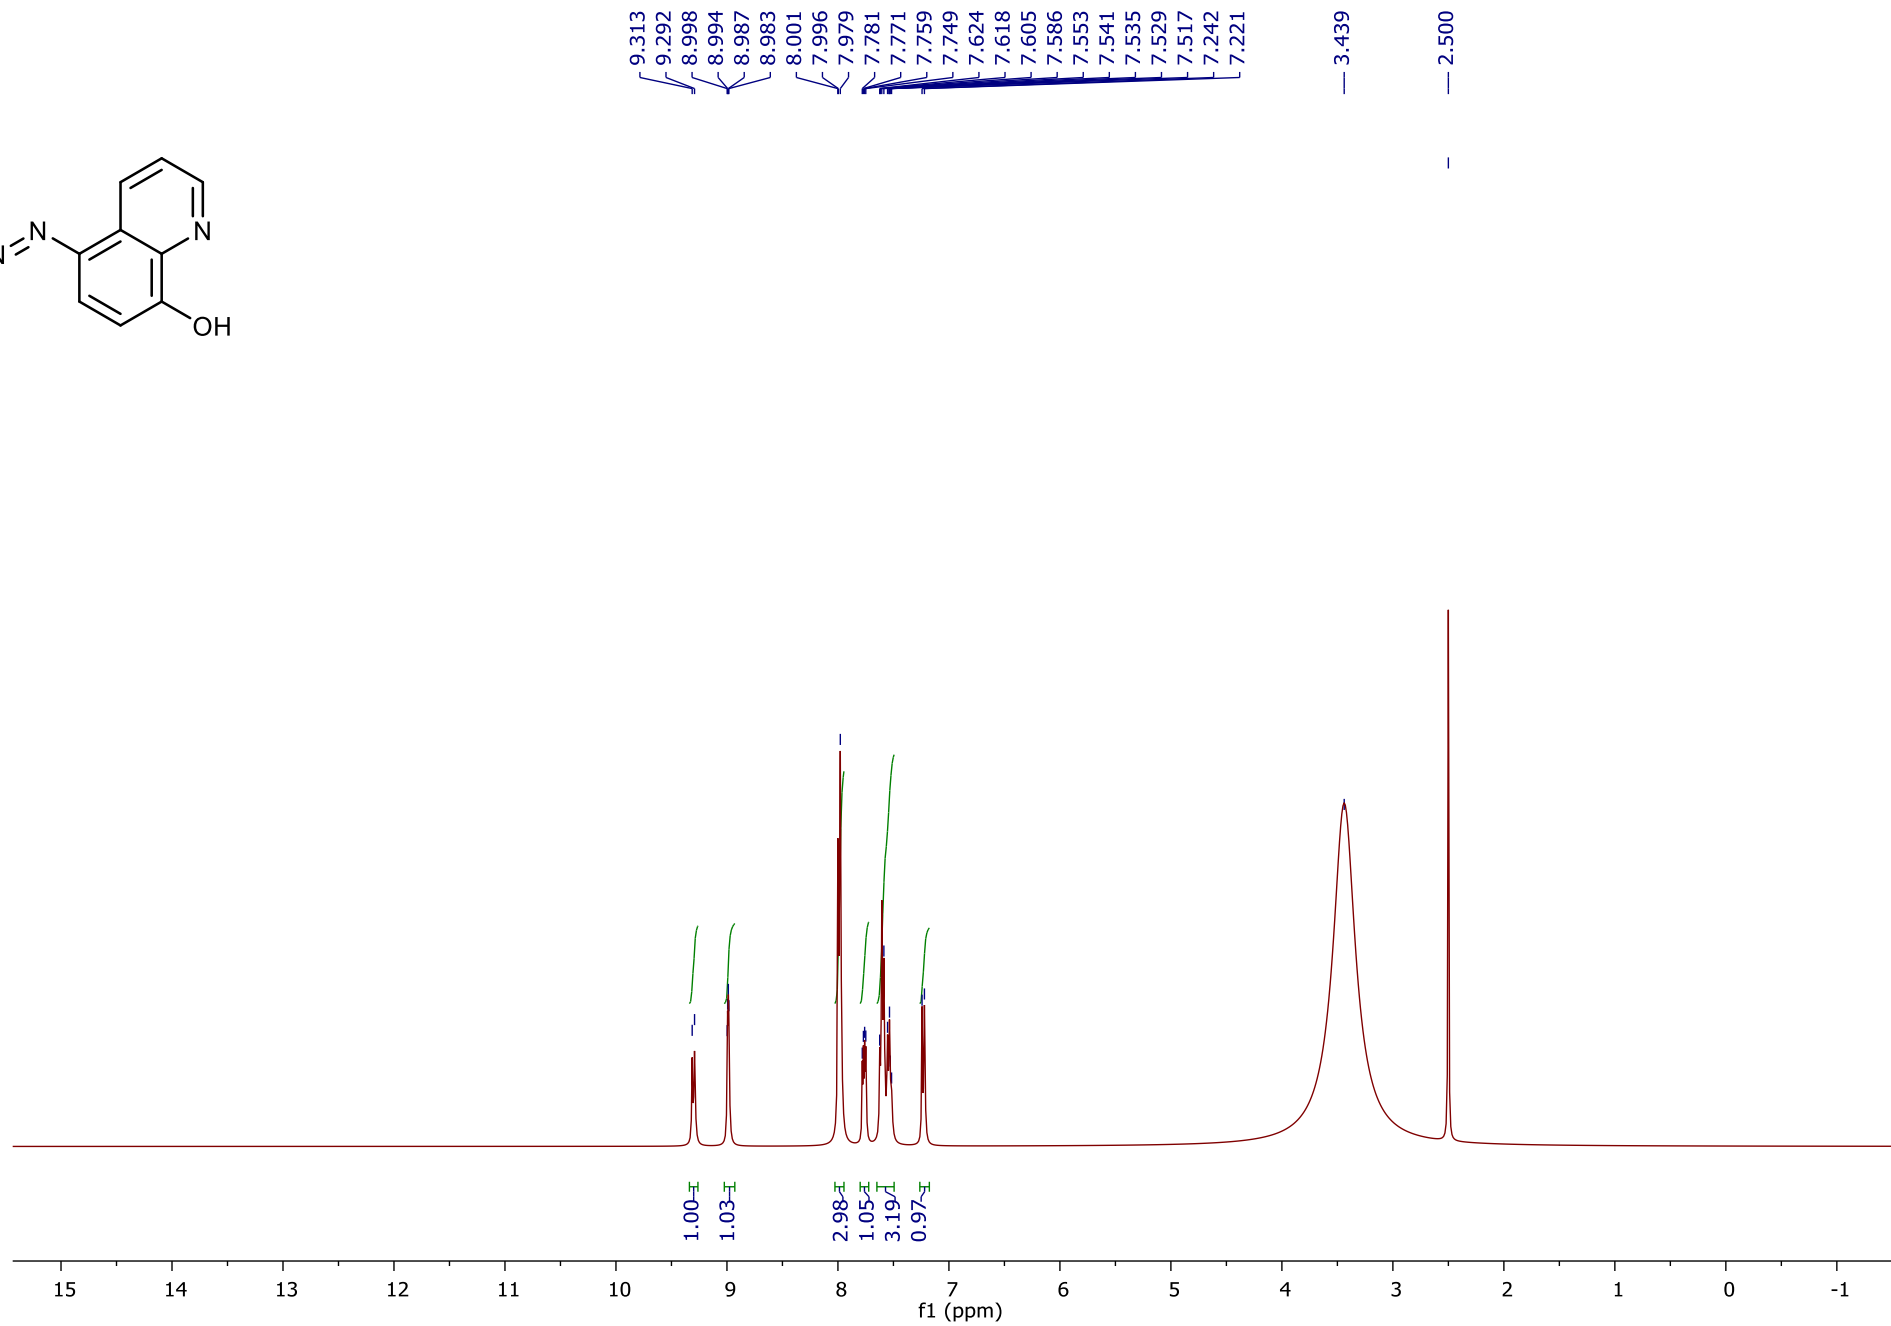

S33: <sup>1</sup>H NMR of Compound 29

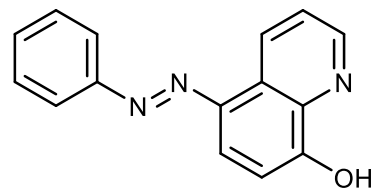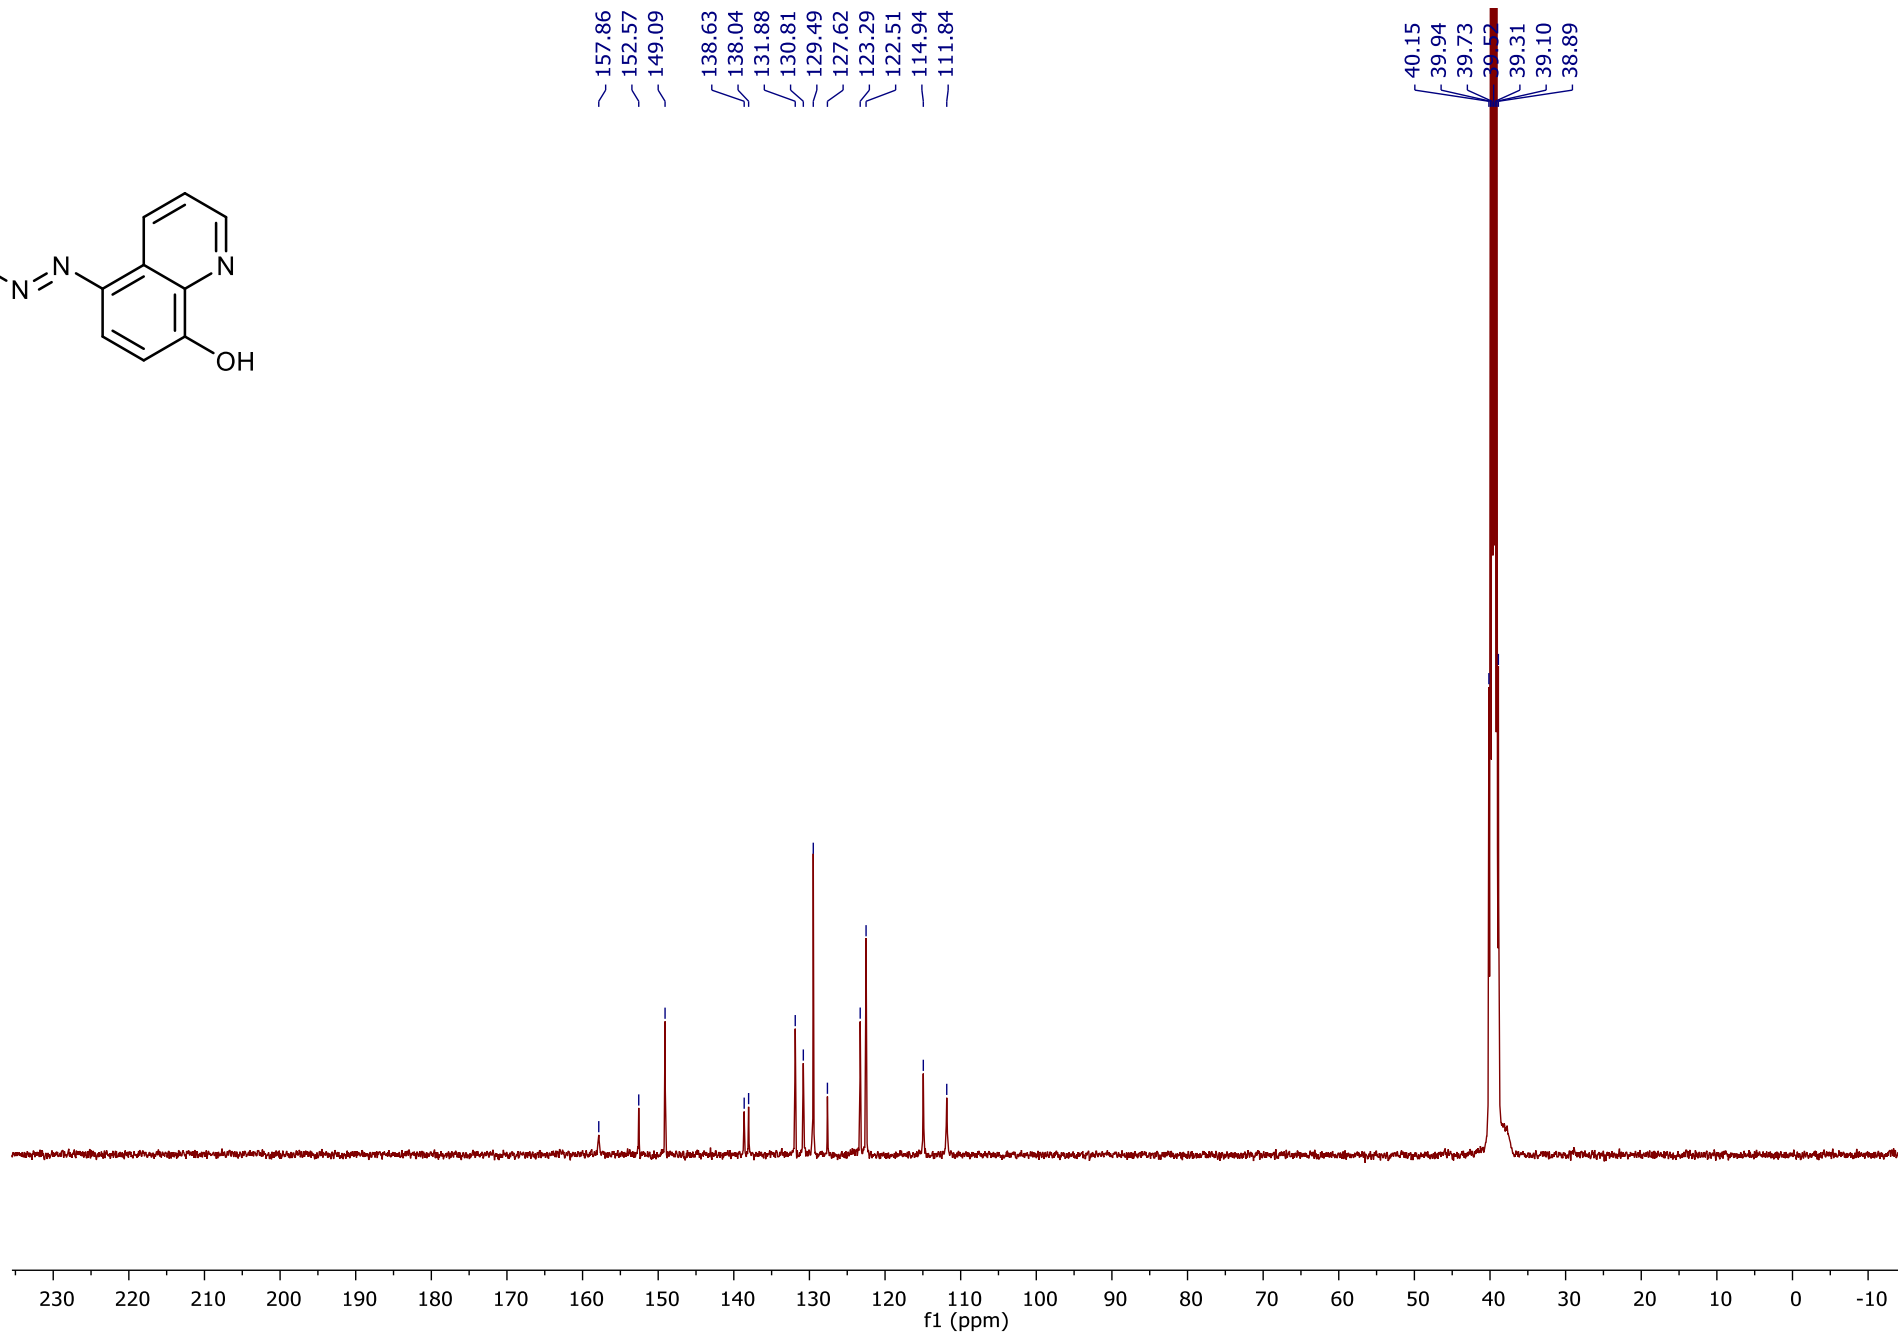

S34. <sup>13</sup>C NMR of Compound 29
